# Supplementary material
Source: publisher figshare collection journal article supplement (https://acs.figshare.com/ndownloader/files/21724335)
Supplement: Supplementary file 1 [file 21724335]

## Supporting Information

**Direct Comparison of (N)-Methanocarpa and Ribose-Containing 2-Arylalkynyladenosine Derivatives as A<sub>3</sub> Receptor Agonists**

Dilip K. Tosh, Veronica Salmaso, Harsha Rao, Ryan Campbell, Amelia Bitant, Zhan-Guo Gao, John A. Auchampach, Kenneth A. Jacobson

| <b>Contents</b>                                                                           | <b>Pages</b> |
|-------------------------------------------------------------------------------------------|--------------|
| <b>Synthetic Methods</b>                                                                  | S2-S9        |
| <b>Pharmacological Methods</b>                                                            | S10          |
| <b>Off-target interactions for selected compounds (Table S1, Figure S1)</b>               | S11-S15      |
| <b>ADME-tox Results, including rat PK (Figure S2, Table S2)</b>                           | S16-S21      |
| <b>Molecular Modeling Methods</b>                                                         | S22-S24      |
| <b>Molecular Modeling Results (Table S3, Figures S3-S7, legends for Videos S1 and S2)</b> | S25-S30      |
| <b>GPCR and kinase screens (DiscoverX, Table S4 and Figure S8)</b>                        | S31-S36      |
| <b>Representative NMR and Mass Spectra and HPLC Analysis</b>                              | S37-S51      |

## Chemical synthesis

**Scheme S1.** Synthesis of compounds **16** – **19**. Reagents and conditions: (i)  $R^1NH_2$ ,  $Et_3N$ , MeOH, rt; (ii)  $R^1NH_2$ , DIPEA, *i*-PrOH, 150 °C, MW; (iii) 40% MeNH<sub>2</sub>, MeOH, rt; (iv) 5-fluoro-2-ethynylthiophene,  $PdCl_2(Ph_3P)_2$ , CuI,  $Et_3N$ , DMF; (v) 10% TFA MeOH, 70 °C.

**Scheme S2.** Synthesis of compounds **8** and **9**. Reagents and conditions: (i) 5-fluoro-2-ethynylthiophene,  $PdCl_2(Ph_3P)_2$ , CuI,  $Et_3N$ , DMF; (ii) 10% TFA MeOH, 70 °C.

**Scheme S3.** Synthesis of compound **10**. Reagents and conditions: (i) 1-deaza-2-amino-6-chloro purine, BSA, TMSOTf,  $CH_3CN$ , 60 °C; (ii) isoamyl nitrite,  $CH_2I_2$ , CuI,  $I_2$ , THF, 90 °C; (iii) 40% MeNH<sub>2</sub>, MeOH, rt; (iv) 2,2-dimethoxy propane, conc.  $H_2SO_4$ , acetone, rt (v) TEMPO-BIAB,  $CH_3CN-H_2O$ ; (vi) MeNH<sub>2</sub>.HCl, HATU, DIPEA, DMF; (vii) MeNH<sub>2</sub>.HCl, DIPEA, *i*-PrOH, 150 °C, MW; (viii) 5-fluoro-2-ethynylthiophene,  $PdCl_2(Ph_3P)_2$ , CuI,  $Et_3N$ , DMF; (ix) 10% TFA, MeOH 70 °C.

## Scheme S1

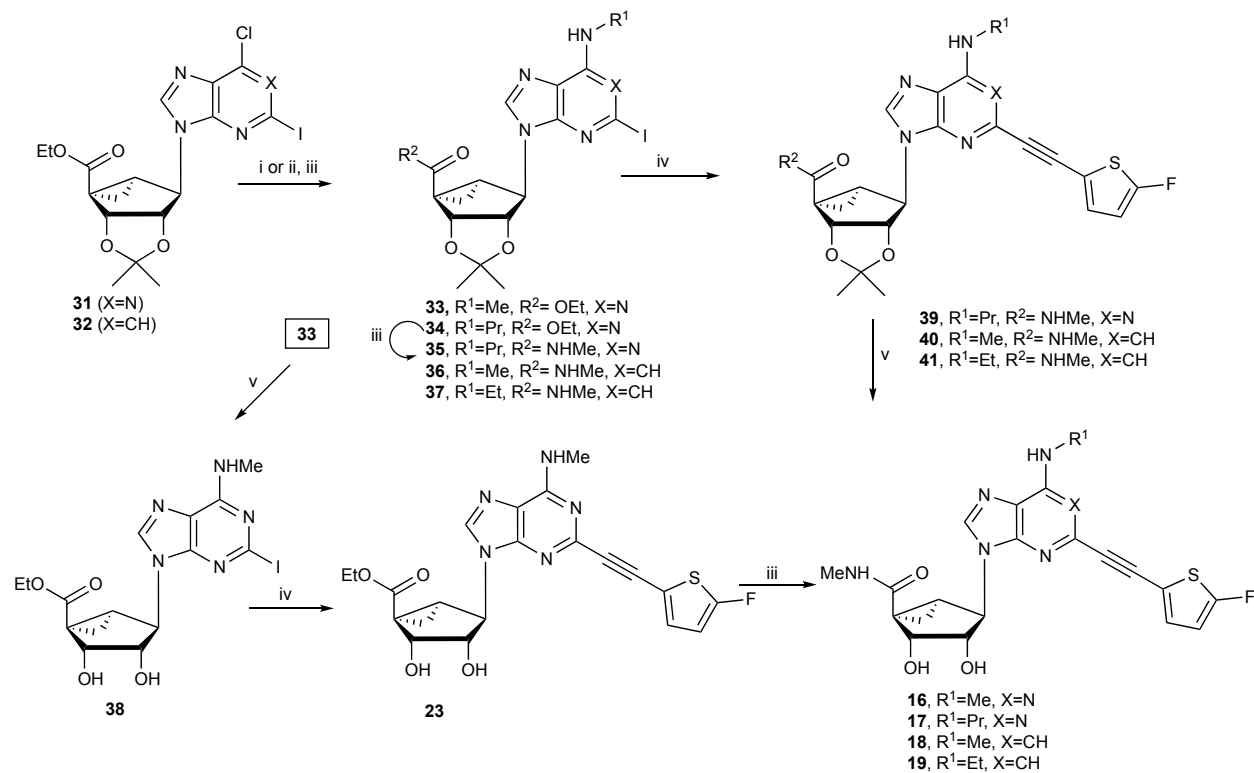

## Scheme S2

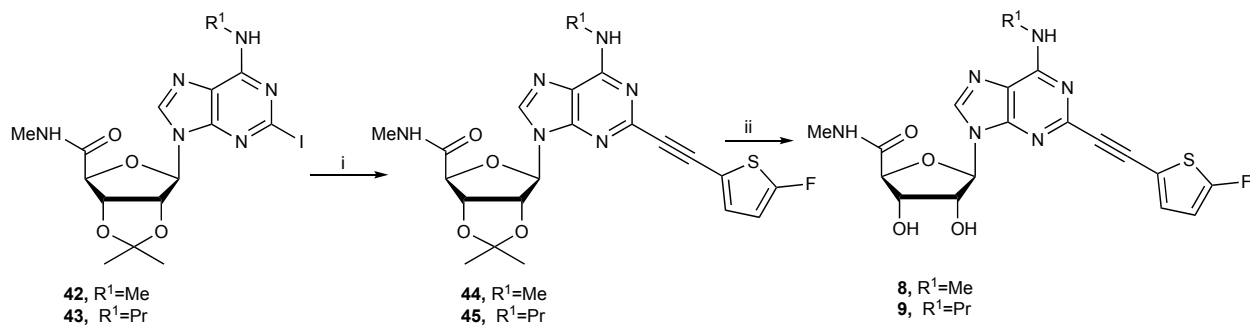

## Scheme S3

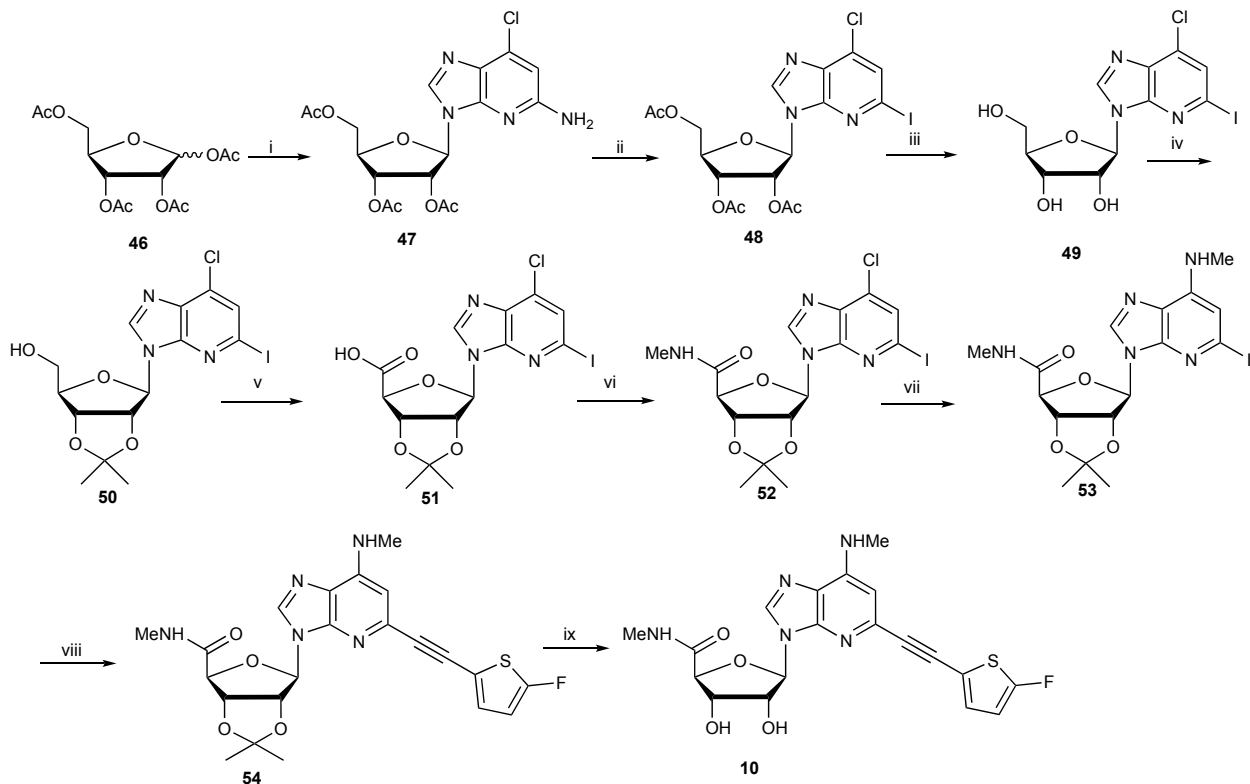

## Chemical synthesis

### Materials and instrumentation

All reagents and solvents were purchased from Sigma-Aldrich (St. Louis, MO).  $^1\text{H}$  NMR spectra were obtained with a Bruker 400 spectrometer using  $\text{CDCl}_3$ ,  $\text{CD}_3\text{OD}$  and DMSO as solvents. Chemical shifts are expressed in  $\delta$  values (ppm) with tetramethylsilane ( $\delta$  0.00) for  $\text{CDCl}_3$  and water ( $\delta$  3.30) for  $\text{CD}_3\text{OD}$ . NMR spectra were collected with a Bruker AV spectrometer equipped with a z-gradient [ $^1\text{H}$ ,  $^{13}\text{C}$ ,  $^{15}\text{N}$ ]-cryoprobe. TLC analysis was carried out on glass sheets precoated with silica gel F254 (0.2 mm) from Aldrich. The purity of final nucleoside derivatives was checked using a Hewlett–Packard 1100 HPLC equipped with a Zorbax SB-Aq 5  $\mu\text{m}$  analytical column (50  $\times$  4.6 mm; Agilent Technologies Inc., Palo Alto, CA). Mobile phase: linear gradient solvent system, 5 mM TBAP (tetrabutylammonium dihydrogen phosphate) –  $\text{CH}_3\text{CN}$  from 80:20 to 0:100 in 13 min; the flow rate was 0.5 mL/min. Peaks were detected by UV absorption with a diode array detector at 230, 254, and 280 nm. All derivatives tested for biological activity showed >95% purity by HPLC analysis (detection at 254 nm). Low-resolution mass spectrometry was performed with a JEOL SX102 spectrometer with 6-kV Xe atoms following desorption from a glycerol matrix or on an Agilent LC/MS 1100 MSD, with a Waters (Milford, MA) Atlantis C18 column. High resolution mass spectroscopic (HRMS) measurements were performed on a proteomics optimized Q-TOF-2 (Micromass-Waters) using external calibration with polyalanine, unless noted. Observed mass accuracies are those expected based on known performance of the instrument as well as trends in masses of standard compounds observed at intervals during the series of measurements. Reported masses are observed masses uncorrected for this time-dependent drift in mass accuracy. All of the monosubstituted alkyne intermediates were purchased from Sigma-Aldrich (St. Louis, MO), Small Molecules, Inc. (Hoboken, NJ), Anichem (North Brunswick, NJ), PharmaBlock, Inc. (Sunnyvale, CA), Frontier Scientific (Logan, UT) and Tractus (Perrineville, NJ).

#### **(2*S*,3*S*,4*R*,5*R*)-5-(2-((5-Fluorothiophen-2-yl)ethynyl)-6-(methylamino)-9H-purin-9-yl)-3,4-dihydroxy-N-methyltetrahydrofuran-2-carboxamide (8)**

Compound **8** (92%) was prepared from compound **44** following the same method as for compound **17**.  $^1\text{H}$  NMR ( $\text{CD}_3\text{OD}$ , 400 MHz)  $\delta$  8.26 (s, 1H), 7.19 (t,  $J=4.0$  Hz, 1H), 6.65–6.63 (m, 1H), 6.00 (d,  $J=8.0$  Hz, 1H), 4.77–4.74 (m, 1H), 4.50 (1H), 4.33 (d,  $J=4.8$  Hz, 1H), 3.14 (br s, 3H), 3.00 (s, 3H). HRMS calculated for  $\text{C}_{18}\text{H}_{18}\text{N}_6\text{O}_4\text{FS}$  ( $\text{M} + \text{H}$ ) $^+$ : 433.1094; found 433.1096.

#### **(2*S*,3*S*,4*R*,5*R*)-5-(2-((5-Fluorothiophen-2-yl)ethynyl)-6-(propylamino)-9H-purin-9-yl)-3,4-dihydroxy-N-methyltetrahydrofuran-2-carboxamide (9)**

Compound **8** (89%) was prepared from compound **45** following the same method as for compound **17**.  $^1\text{H}$  NMR ( $\text{CD}_3\text{OD}$ , 400 MHz)  $\delta$  8.25 (s, 1H), 7.19 (t,  $J=4.0$  Hz, 1H), 6.65–6.63 (m, 1H), 6.00 (d,  $J=8.0$  Hz, 1H), 4.78–4.75 (m, 1H), 4.50 (s, 1H), 4.33 (dd,  $J_1=1.2$  Hz,  $J_2=4.8$  Hz, 1H), 3.59 (br s, 2H), 3.00 (s, 3H), 1.77–1.70 (m, 2H), 1.06 (d,  $J=6.4$  Hz, 3H). HRMS calculated for  $\text{C}_{20}\text{H}_{22}\text{N}_6\text{O}_4\text{FS}$  ( $\text{M} + \text{H}$ ) $^+$ : 461.1407; found 461.1404.

#### **(2*S*,3*S*,4*R*,5*R*)-5-(5-((5-Fluorothiophen-2-yl)ethynyl)-7-(methylamino)-3H-imidazo[4,5-b]pyridin-3-yl)-3,4-dihydroxy-N-methyltetrahydrofuran-2-carboxamide (10)**

Compound **10** (92%) was prepared from compound **54** following the same method as for compound **17**.  $^1\text{H}$  NMR ( $\text{CD}_3\text{OD}$ , 400 MHz)  $\delta$  8.32 (br s, 1H), 7.21 (s, 1H), 6.86 (s, 1H), 6.67 (s,

1H), 6.06 (d,  $J = 7.6$  Hz, 1H), 4.68-4.61 (m, 2H), 4.28 (d,  $J = 4.4$  Hz, 1H), 3.15 (s, 3H), 2.97 (s, 3H). HRMS calculated for  $C_{19}H_{19}N_5O_4FS$  ( $M + H$ )<sup>+</sup>: 432.1142; found 432.1141.

**(1*S*,2*R*,3*S*,4*R*,5*S*)-4-(2-((5-Fluorothiophen-2-yl)ethynyl)-6-(methylamino)-9H-purin-9-yl)-2,3-dihydroxy-*N*-methylbicyclo[3.1.0]hexane-1-carboxamide (16)**

40% MeNH<sub>2</sub> (1.5 mL) solution was added to a solution of compound **23** (50 mg, 0.1 mmol) in MeOH (1.5 mL) and stirred at room temperature for overnight. Solvent was evaporated and the residue was purified on flash silica gel column chromatography (CH<sub>2</sub>Cl<sub>2</sub>:MeOH = 20:1) to give the compound **16** (36 mg, 75%) as a colorless syrup. <sup>1</sup>H NMR (CD<sub>3</sub>OD, 400 MHz)  $\delta$  8.09 (s, 1H), 7.19 (t,  $J = 4.0$  Hz, 1H), 6.64-6.62 (m, 1H), 5.05 (d,  $J = 6.4$  Hz, 1H), 4.81 (s, 1H), 4.02 (d,  $J = 6.4$  Hz, 1H), 3.13 (br s, 3H), 2.12-2.09 (m, 1H), 1.88 (t,  $J = 4.8$  Hz, 1H), 1.41-1.38 (m, 1H). HRMS calculated for  $C_{20}H_{20}N_6O_3FS$  ( $M + H$ )<sup>+</sup>: 443.1302; found 443.1295.

**(1*S*,2*R*,3*S*,4*R*,5*S*)-4-(2-((5-Fluorothiophen-2-yl)ethynyl)-6-(propylamino)-9H-purin-9-yl)-2,3-dihydroxy-*N*-methylbicyclo[3.1.0]hexane-1-carboxamide (17)**

A solution of compound **39** (36 mg, 0.07 mmol) in methanol (1.5 mL) and 10% trifluoromethanesulfonic acid (1.5 mL) was heated at 70 °C for 3 h. Solvent was evaporated under vacuum, and the residue was purified on flash silica gel column chromatography (CH<sub>2</sub>Cl<sub>2</sub>:MeOH = 30:1) to give the compound **17** (30 mg, 91%) as colorless syrup. <sup>1</sup>H NMR (CD<sub>3</sub>OD, 400 MHz)  $\delta$  8.10 (s, 1H), 7.19 (t,  $J = 4.0$  Hz, 1H), 6.64-6.62 (m, 1H), 5.04 (d,  $J = 6.4$  Hz, 1H), 4.82 (s, 1H), 4.02 (d,  $J = 6.4$  Hz, 1H), 3.57 (br s, 2H), 2.86 (s, 3H), 2.12-2.09 (m, 1H), 1.88 (t,  $J = 4.8$  Hz, 1H), 1.75-1.68 (m, 2H), 1.41-1.37 (m, 1H), 1.04 (t,  $J = 7.2$  Hz, 3H). HRMS calculated for  $C_{22}H_{24}N_6O_3FS$  ( $M + H$ )<sup>+</sup>: 471.1615; found 471.1623.

**(1*S*,2*R*,3*S*,4*R*,5*S*)-4-(5-((5-Fluorothiophen-2-yl)ethynyl)-7-(methylamino)-3H-imidazo[4,5-b]pyridin-3-yl)-2,3-dihydroxy-*N*-methylbicyclo[3.1.0]hexane-1-carboxamide (18)**

Compound **18** (91%) was prepared from compound **40** following the same method as for compound **17**. <sup>1</sup>H NMR (CD<sub>3</sub>OD, 400 MHz)  $\delta$  8.35 (s, 1H), 7.13 (t,  $J = 4.0$  Hz, 1H), 6.71 (s, 1H), 6.63-6.61 (m, 1H), 4.98 (d,  $J = 6.0$  Hz, 1H), 4.93 (s, 1H), 4.01 (d,  $J = 6.4$  Hz, 1H), 3.07 (s, 3H), 2.86 (s, 3H), 2.15-2.11 (m, 1H), 1.92 (t,  $J = 4.8$  Hz, 1H), 1.42-1.38 (m, 1H). HRMS calculated for  $C_{21}H_{21}N_5O_3FS$  ( $M + H$ )<sup>+</sup>: 442.1349 Found 442.1349.

**(1*S*,2*R*,3*S*,4*R*,5*S*)-4-(7-(Ethylamino)-5-((5-fluorothiophen-2-yl)ethynyl)-3H-imidazo[4,5-b]pyridin-3-yl)-2,3-dihydroxy-*N*-methylbicyclo[3.1.0]hexane-1-carboxamide (19)**

Compound **19** (90%) was prepared from compound **41** following the same method as for compound **17**. <sup>1</sup>H NMR (CD<sub>3</sub>OD, 400 MHz)  $\delta$  8.41 (s, 1H), 7.14 (t,  $J = 4.0$  Hz, 1H), 6.74 (s, 1H), 6.63-6.61 (m, 1H), 4.98 (d,  $J = 6.4$  Hz, 1H), 4.94 (s, 1H), 4.01 (d,  $J = 6.0$  Hz, 1H), 3.51-3.46 (m, 2H), 2.86 (s, 3H), 2.15-2.12 (m, 1H), 1.92 (t,  $J = 4.8$  Hz, 1H), 1.42-1.34 (m, 4H). HRMS calculated for  $C_{22}H_{23}N_5O_3FS$  ( $M + H$ )<sup>+</sup>: 456.1506; found 456.1508.

**Ethyl (1*S*,2*R*,3*S*,4*R*,5*S*)-4-(2-((5-Fluorothiophen-2-yl)ethynyl)-6-(methylamino)-9H-purin-9-yl)-2,3-dihydroxybicyclo[3.1.0]hexane-1-carboxylate (23)**

Compound **23** (84%) was prepared from compound **38** following the same method for compound **39**. <sup>1</sup>H NMR (CD<sub>3</sub>OD, 400 MHz)  $\delta$  8.04 (s, 1H), 7.20 (t,  $J = 4.0$  Hz, 1H), 6.64-6.62 (m, 1H), 5.22 (d,  $J = 6.4$  Hz, 1H), 4.84 (s, 1H), 4.27-4.22 (m, 2H), 4.12 (d,  $J = 6.8$  Hz, 1H), 3.13 (br s, 3H),

2.23-2.19 (m, 1H), 1.92 (t,  $J = 4.8$  Hz, 1H), 1.67-1.63 (m, 1H), 1.29 (t,  $J = 7.2$  Hz, 3H). HRMS calculated for  $C_{21}H_{21}N_5O_4FS$  ( $M + H$ )<sup>+</sup>: 458.1298; found 458.1298.

**Ethyl (3a*R*,3b*S*,4a*S*,5*R*,5a*S*)-5-(2-((5-fluorothiophen-2-yl)ethynyl)-6-(propylamino)-9H-purin-9-yl)-2,2-dimethyltetrahydrocyclopropa[3,4]cyclopenta[1,2-d][1,3]dioxole-3b(3aH)-carboxylate (39)**

$PdCl_2(PPh_3)_2$  (12.32 mg, 0.01 mmol), CuI (1.6 mg, 0.008 mmol), 2-ethynyl-5-fluorothiophene (66 mg, 0.52 mmol) and triethylamine (0.12 mL, 0.87 mmol) were added to a solution of compound **35** (45 mg, 0.08 mmol) in anhydrous DMF (1.0 mL), and the mixture heated at 66 °C for 2 h. Solvent was evaporated under vacuum, and the residue was purified on flash silica gel column chromatography ( $CH_2Cl_2$ :MeOH = 35:1) to give the compound **39** (36 mg, 82%) as a brown syrup. <sup>1</sup>H NMR ( $CD_3OD$ , 400 MHz)  $\delta$  8.14 (s, 1H), 7.25 (t,  $J = 4.0$  Hz, 1H), 6.64-6.63 (m, 1H), 5.80 (d,  $J = 7.2$  Hz, 1H), 5.01 (s, 1H), 3.57 (br s, 2H), 2.82 (s, 3H), 2.16-2.13 (m, 1H), 1.75-1.71 (m, 2H), 1.55 (s, 3H), 1.42 (t,  $J = 5.2$  Hz, 1H), 1.31 (s, 3H), 1.03 (t,  $J = 7.2$  Hz, 3H). HRMS calculated for  $C_{25}H_{28}N_6O_3FS$  ( $M + H$ )<sup>+</sup>: 511.1928; found 511.1929.

**(3a*R*,3b*S*,4a*S*,5*R*,5a*S*)-5-(5-((5-Fluorothiophen-2-yl)ethynyl)-7-(methylamino)-3H-imidazo[4,5-b]pyridin-3-yl)-N,2,2-trimethyltetrahydrocyclopropa[3,4]cyclopenta[1,2-d][1,3]dioxole-3b(3aH)-carboxamide (40)**

Compound **40** (82%) was prepared from compound **36** following the same method as for compound **39**. <sup>1</sup>H NMR ( $CD_3OD$ , 400 MHz)  $\delta$  8.17 (s, 1H), 7.15 (t,  $J = 4.0$  Hz, 1H), 6.63 (s, 1H), 6.61-6.60 (m, 1H), 5.77 (d,  $J = 6.8$  Hz, 1H), 5.05 (s, 1H), 4.85 (d,  $J = 6.4$  Hz, 1H), 3.00 (s, 3H), 2.81 (s, 3H), 2.15-2.11 (m, 1H), 1.56-1.53 (m, 4H), 1.42 (t,  $J = 5.2$  Hz, 1H), 1.29 (s, 3H). HRMS calculated for  $C_{24}H_{25}N_5O_3FS$  ( $M + H$ )<sup>+</sup>: 482.1662; found 482.1667.

**(3a*R*,3b*S*,4a*S*,5*R*,5a*S*)-5-(7-(Ethylamino)-5-((5-fluorothiophen-2-yl)ethynyl)-3H-imidazo[4,5-b]pyridin-3-yl)-N,2,2-trimethyltetrahydrocyclopropa[3,4]cyclopenta[1,2-d][1,3]dioxole-3b(3aH)-carboxamide (41)**

Compound **41** (81%) was prepared from compound **37** following the same method for compound **39**. <sup>1</sup>H NMR ( $CD_3OD$ , 400 MHz)  $\delta$  8.15 (s, 1H), 7.15 (t,  $J = 4.0$  Hz, 1H), 6.67 (s, 1H), 6.62-6.60 (m, 1H), 5.77 (d,  $J = 6.8$  Hz, 1H), 5.05 (s, 1H), 4.85 (d,  $J = 6.4$  Hz, 1H), 3.44-3.39 (m, 2H), 2.82 (s, 3H), 2.15-2.11 (m, 1H), 1.56-1.53 (m, 4H), 1.42 (t,  $J = 5.2$  Hz, 1H), 1.34 (t,  $J = 7.2$  Hz, 3H), 1.29 (s, 3H). HRMS calculated for  $C_{25}H_{27}N_5O_3FS$  ( $M + H$ )<sup>+</sup>: 496.1819; found 496.1826.

**(3a*S*,4*S*,6*R*,6a*R*)-6-(2-((5-Fluorothiophen-2-yl)ethynyl)-6-(methylamino)-9H-purin-9-yl)-N,2,2-trimethyltetrahydrofuro[3,4-d][1,3]dioxole-4-carboxamide (44)**

Compound **44** (80%) was prepared from compound **42** following the same method as for compound **39**. <sup>1</sup>H NMR ( $CD_3OD$ , 400 MHz)  $\delta$  8.21 (s, 1H), 7.23 (t,  $J = 4.0$  Hz, 1H), 6.63 (t,  $J = 4.0$  Hz, 1H), 6.31 (d,  $J = 1.6$ , 1H), 5.51 (d,  $J = 4.0$  Hz, 1H), 5.38 (d,  $J = 4.0$  Hz, 1H), 4.66 (s, 1H), 3.12 (br s, 3H), 2.53 (s, 3H), 1.62 (s, 3H), 1.42 (s, 3H). HRMS calculated for  $C_{21}H_{22}N_6O_4FS$  ( $M + H$ )<sup>+</sup>: 473.1407; found 473.1411.

**(3a*S*,4*S*,6*R*,6a*R*)-6-(2-((5-Fluorothiophen-2-yl)ethynyl)-6-(propylamino)-9H-purin-9-yl)-N,2,2-trimethyltetrahydrofuro[3,4-d][1,3]dioxole-4-carboxamide (45)**

Compound **45** (82%) was prepared from compound **43** following the same method as for compound **39**. <sup>1</sup>H NMR ( $CD_3OD$ , 400 MHz)  $\delta$  8.21 (s, 1H), 7.22 (t,  $J = 4.0$  Hz, 1H), 6.63-6.64

(m, 1H), 6.30 (s, 1H), 4.66 (s, 1H), 3.56 (br s, 2H), 2.53 (s, 3H), 1.75-1.62 (m, 2H), 1.62 (s, 3H), 1.42 (s, 3H), 1.03 (t,  $J = 7.6$  Hz, 3H). HRMS calculated for  $C_{23}H_{26}N_6O_4FS$  ( $M + H$ )<sup>+</sup>: 501.1720; found 501.1723.

**(2*R*,3*R*,4*R*,5*R*)-2-(Acetoxymethyl)-5-(5-amino-7-chloro-3H-imidazo[4,5-*b*]pyridin-3-yl)tetrahydrofuran-3,4-diyl diacetate (47)**

BSA (0.76 mL, 3.14 mmol) was added to a suspension of 1-deaza-2-amino-6-chloro-purine (317 mg, 1.88 mmol) in dry  $CH_3CN$  (35 mL) and heated at 60 °C for 1 h until it became clear. A solution of tetraacetate riboside (500 mg, 1.57 mmol) in dry  $CH_3CN$  (10 mL) followed by TMSOTf (0.14 mL, 0.78 mmol) were added into the reaction mixture and continued heating at 60 °C for overnight. The reaction mixture was cooled down to room temperature and quenched with saturated  $NaHCO_3$  solution and stirred for 15 min. Aqueous layer was extracted with ethyl acetate (3 times) and combined organic layer was washed with brine, filtered and evaporated. The residue was purified on flash silica gel column chromatography (hexane:ethyl acetate = 1:2) to give the compound **48** (445 mg, 66%) as foamy solid.  $^1H$  NMR ( $CD_3OD$ , 400 MHz)  $\delta$  8.12 (s, 1H), 6.61 (s, 1H), 6.18 (d,  $J = 4.4$  Hz, 1H), 6.06 (t,  $J = 5.2$  Hz, 1H), 5.86 (t,  $J = 5.2$  Hz, 1H), 4.48-4.47 (m, 1H), 4.44-4.35 (m, 2H), 2.14 (s, 3H), 2.08 (s, 3H), 2.03 (s, 3H). HRMS calculated for  $C_{17}H_{20}N_4O_7Cl$  ( $M + H$ )<sup>+</sup>: 427.1021; found 427.1016.

**(2*R*,3*R*,4*R*,5*R*)-2-(Acetoxymethyl)-5-(7-chloro-5-iodo-3H-imidazo[4,5-*b*]pyridin-3-yl)tetrahydrofuran-3,4-diyl diacetate (48)**

CuI (218 mg, 1.14 mmol), iodine (264 mg, 1.04 mmol),  $CH_2I_2$  (0.84 mL, 10.4 mmol) and isoamyl nitrite (0.42 mL, 3.13 mmol) were added to a solution of compound **47** (445 mg, 1.04 mmol) in dry THF (15 mL) and refluxed at 90 °C for 2 h. After cooling down the reaction mixture to room temperature, water was added into the reaction mixture and the aqueous layer was extracted with ethyl acetate. The combined organic layer was washed with saturated sodium bisulfite solution followed by brine, dried, filtered and evaporated under vacuum. The residue was purified on flash silica gel column chromatography (hexane:ethyl acetate = 2:1) to give the compound **48** (296 mg, 53%) as a brownish syrup.  $^1H$  NMR ( $CD_3OD$ , 400 MHz)  $\delta$  8.54 (s, 1H), 7.87 (s, 1H), 6.32 (d,  $J = 4.8$  Hz, 1H), 5.98 (t,  $J = 5.2$  Hz, 1H), 5.76 (t,  $J = 5.2$  Hz, 1H), 4.48-4.38 (m, 3H), 2.16 (s, 3H), 2.10 (s, 3H), 2.06 (s, 3H). HRMS calculated for  $C_{17}H_{18}N_3O_7ClI$  ( $M + H$ )<sup>+</sup>: 537.9878; found 537.9875.

**(2*R*,3*R*,4*S*,5*R*)-2-(7-Chloro-5-iodo-3H-imidazo[4,5-*b*]pyridin-3-yl)-5-(hydroxymethyl)tetrahydrofuran-3,4-diol (49)**

A solution of compound **48** (142 mg, 0.26 mmol) in MeOH (4 mL) and 40% MeNH<sub>2</sub> (4 mL) were stirred at room temperature for 5 h. Solvent was evaporated and the residue was purified on flash silica gel chromatography ( $CH_2Cl_2$ :MeOH = 15:1) to give the compound **49** (91 mg, 84%) as a colorless syrup.  $^1H$  NMR ( $CD_3OD$ , 400 MHz)  $\delta$  8.70 (s, 1H), 7.86 (s, 1H), 6.12 (d,  $J = 5.6$  Hz, 1H), 4.71 (d,  $J = 5.2$  Hz, 1H), 4.38 (t,  $J = 8.8$  Hz, 1H), 4.18-4.15 (m, 1H), 4.93 (dd,  $J_1 = 3.2$  Hz,  $J_2 = 12.4$  Hz, 1H), 3.81 (dd,  $J_1 = 3.2$  Hz,  $J_2 = 12.4$  Hz, 1H). HRMS calculated for  $C_{11}H_{12}N_3O_4ClI$  ( $M + H$ )<sup>+</sup>: 411.9483; found 411.9487.

**((3*aR*,4*R*,6*R*,6*aR*)-6-(7-Chloro-5-iodo-3H-imidazo[4,5-*b*]pyridin-3-yl)-2,2-dimethyltetrahydrofuro[3,4-*d*][1,3]dioxol-4-yl)methanol (50)**

2,2-Dimethoxypropane (0.2 mL, 1.65 mmol) and conc.  $\text{H}_2\text{SO}_4$  (10.2  $\mu\text{L}$ ), were added to a solution of compound **49** (68 mg, 0.16 mmol) in acetone (2 mL) and stirred at room temperature for overnight. Reaction mixture was neutralized with  $\text{NaHCO}_3$  and evaporated under vacuum. The residue was partition with water and ethyl acetate, the combined organic layer was dried, filtered and evaporated. The residue was purified on flash silica gel column chromatography (hexane:ethyl acetate = 1:2) to give the compound **50** (55 mg, 74%) as a colorless syrup.  $^1\text{H}$  NMR ( $\text{CD}_3\text{OD}$ , 400 MHz)  $\delta$  8.66 (s, 1H), 7.86 (s, 1H), 6.29 (d,  $J$  = 6.4 Hz, 1H), 5.36-5.33 (m, 1H), 5.07-5.03 (m, 1H), 4.41-4.36 (m, 1H), 3.82-3.72 (m, 2H), 1.63 (s, 3H), 1.41 (s, 3H). HRMS calculated for  $\text{C}_{14}\text{H}_{16}\text{N}_3\text{O}_4\text{ClI}$  ( $\text{M} + \text{H}$ ) $^+$ : 451.9874; found 451.9870.

**(3a*S*,4*S*,6*R*,6a*R*)-6-(7-Chloro-5-iodo-3*H*-imidazo[4,5-*b*]pyridin-3-yl)-2,2-dimethyltetrahydro furo[3,4-*d*][1,3]dioxole-4-carboxylic acid (51)**

TEMPO (19 mg, 0.24 mmol), BAIB (98 mg, 0.3 mmol) were added to a solution of compound **50** (55 mg, 0.12 mmol) in  $\text{CH}_3\text{CN}$  (1 mL) and water (1 mL) and stirred at room temperature for 2 days. Aqueous layer was extracted with ethyl acetate (3 times) and the combined organic layer was dried, filtered and evaporated. The residue was purified on flash silica gel column chromatography ( $\text{CH}_2\text{Cl}_2$ :MeOH = 15:1) to give the compound **51** (28 mg, 50%) as a colorless syrup.  $^1\text{H}$  NMR ( $\text{CD}_3\text{OD}$ , 400 MHz)  $\delta$  8.57 (s, 1H), 7.80 (s, 1H), 6.43 (s, 1H), 5.68 (d,  $J$  = 5.6 Hz, 1H), 5.57 (d,  $J$  = 6.0 Hz, 1H), 4.79 (s, 1H), 1.60 (s, 3H), 1.44 (s, 3H). HRMS calculated for  $\text{C}_{14}\text{H}_{14}\text{N}_3\text{O}_5\text{ClI}$  ( $\text{M} + \text{H}$ ) $^+$ : 465.9667; found 465.9665.

**(3a*S*,4*S*,6*R*,6a*R*)-6-(7-chloro-5-iodo-3*H*-imidazo[4,5-*b*]pyridin-3-yl)-*N*,2,2-trimethyltetrahydrofuro[3,4-*d*][1,3]dioxole-4-carboxamide (52)**

$\text{MeNH}_2\cdot\text{HCl}$  (4.8 mg, 0.072 mmol), HATU (29.7 mg, 0.078 mmol) and DIPEA (13  $\mu\text{L}$ , 0.078 mmol) were added to a solution of compound **51** (28 mg, 0.06 mmol) in DMF (1 mL) and stirred at room temperature for overnight. Solvent was evaporated under vacuum and the residue was purified on flash silica gel column chromatography (hexane:ethyl acetate = 1:3) to give the compound **52** (26 mg, 93%) as colorless syrup.  $^1\text{H}$  NMR ( $\text{CD}_3\text{OD}$ , 400 MHz)  $\delta$  8.54 (s, 1H), 7.83 (s, 1H), 6.44 (s, 1H), 5.64-5.62 (dd,  $J_1$  = 2.4 Hz,  $J_2$  = 6.2 Hz, 1H), 5.47 (d,  $J$  = 6.4 Hz, 1H), 4.69 (s, 1H), 2.35 (d,  $J$  = 4.8 Hz, 3H), 1.61 (s, 3H), 1.42 (s, 3H). HRMS calculated for  $\text{C}_{15}\text{H}_{17}\text{N}_4\text{O}_4\text{ClI}$  ( $\text{M} + \text{H}$ ) $^+$ : 478.9983; found 478.9978.

**(3a*S*,4*S*,6*R*,6a*R*)-6-(5-Iodo-7-(methylamino)-3*H*-imidazo[4,5-*b*]pyridin-3-yl)-*N*,2,2-trimethyltetrahydrofuro[3,4-*d*][1,3]dioxole-4-carboxamide (53)**

To a solution of compound **52** (33 mg, 0.069 mmol) in DMF (1 mL)  $\text{MeNH}_2\cdot\text{HCl}$  (23.2 mg, 0.34 mmol) and DIPEA (0.12 mL, 0.69 mmol) were heated at 150  $^\circ\text{C}$  for 3 h under microwave condition. Solvent was evaporated under vacuum and the residue was purified on flash silica gel column chromatography (Ethyl acetate:MeOH = 60:1) to give the compound **53** (21 mg, 65%) as colorless syrup.  $^1\text{H}$  NMR ( $\text{CD}_3\text{OD}$ , 400 MHz)  $\delta$  8.08 (s, 1H), 6.75 (s, 1H), 6.30 (s, 1H), 5.57 (d,  $J$  = 5.6 Hz, 1H), 5.41 (d,  $J$  = 5.6 Hz, 1H), 4.62 (s, 1H), 2.97 (s, 3H), 2.43 (s, 3H), 1.60 (s, 3H), 1.41 (s, 3H). HRMS calculated for  $\text{C}_{16}\text{H}_{21}\text{N}_5\text{O}_4\text{I}$  ( $\text{M} + \text{H}$ ) $^+$ : 474.0638; found 474.0642.

**(3a*S*,4*S*,6*R*,6a*R*)-6-(5-((5-Fluorothiophen-2-yl)ethynyl)-7-(methylamino)-3*H*-imidazo[4,5-*b*]pyridin-3-yl)-*N*,2,2-trimethyltetrahydrofuro[3,4-*d*][1,3]dioxole-4-carboxamide (54)**

$\text{PdCl}_2(\text{PPh}_3)_2$  (6.22 mg, 0.008 mmol),  $\text{CuI}$  (1.0 mg, 0.004 mmol), 2-ethynyl-5-fluorothiophene (34 mg, 0.52 mmol) and triethylamine (61  $\mu\text{L}$ , 0.44 mmol) were added to a solution of



compound **53** (21 mg, 0.044 mmol) in anhydrous DMF (1.0 mL), and the mixture heated at 70 °C for 2 h. Solvent was evaporated under vacuum, and the residue was purified on flash silica gel column chromatography (CH<sub>2</sub>Cl<sub>2</sub>:MeOH = 45:1) to give the compound **54** (17 mg, 84%) as a brown syrup. <sup>1</sup>H NMR (CD<sub>3</sub>OD, 400 MHz) δ 8.22 (s, 1H), 7.68-7.63 (m, 1H), 7.59-7.55 (m, 1H), 7.12 (t, *J* = 4.0 Hz, 1H), 6.65 (s, 1H), 6.60 (t, *J* = 3.6 Hz, 1H), 6.30 (d, *J* = 6.0 Hz, 1H), 5.45-5.39 (m, 2H), 4.65 (s, 1H), 3.03 (s, 3H), 2.56 (s, 3H), 1.63 (s, 3H), 1.41 (s, 3H). HRMS calculated for C<sub>22</sub>H<sub>23</sub>N<sub>5</sub>O<sub>4</sub>FS (M + H)<sup>+</sup>: 472.1455; found 472.1464.

## Pharmacological Methods

The nucleoside analogues were examined in radioligand binding assays (Table 1A and 1B) at three hARs and two or three mARs as previously described.<sup>1-3</sup>

Binding affinity for human A<sub>1</sub>AR, A<sub>2A</sub>AR, and A<sub>3</sub>ARs was measured as described using membranes from human embryonic kidney (HEK)-293 HEK293 (hA<sub>1</sub>AR, hA<sub>2A</sub>AR) or CHO (hA<sub>3</sub>AR) stably expressing individual recombinant mouse adenosine receptors and using the agonists radioligands. The binding affinity for hA<sub>1</sub>, A<sub>2A</sub> and A<sub>3</sub>ARs was expressed as K<sub>i</sub> values using agonists [<sup>3</sup>H]N<sup>6</sup>-R-phenylisopropyladenosine **55**, [<sup>3</sup>H]2-[p-(2-carboxyethyl)phenyl-ethylamino]-5'-N-ethylcarboxamidoadenosine **56**, or [<sup>125</sup>I]N<sup>6</sup>-(4-amino-3-iodobenzyl)adenosine-5'-N-methyluronamide **57**, respectively. A percent in italics refers to inhibition of binding at 10 μM. Nonspecific binding was determined using 10 μM adenosine 5'-N-ethyluronamide **58** or N-(2-aminoethyl)-2-[4-(2,3,6,7-tetrahydro-2,6-dioxo-1,3-dipropyl-1H-purin-8-yl)phenoxy]-acetamide (XAC, **59**, hA<sub>1</sub>AR, hA<sub>2A</sub>AR).

Binding affinity for mouse A<sub>1</sub>AR, A<sub>2A</sub>AR, and A<sub>3</sub>ARs was measured as described<sup>4</sup> using membranes from human embryonic kidney (HEK)-293 cells stably expressing individual recombinant mouse adenosine receptors and using the agonists [<sup>125</sup>I]N<sup>6</sup>-(4-amino-3-iodobenzyl)adenosine-5'-methyluronamide ([<sup>125</sup>I]AB-MECA; A<sub>1</sub>AR and A<sub>3</sub>AR) and [<sup>3</sup>H]CGS21680 (A<sub>2A</sub>AR) as radioligands. Nonspecific binding was defined using 100 μM adenosine-5'-N-ethylcarboxamide (NECA).

K<sub>i</sub> values were obtained using the Cheng-Prusoff equation<sup>5</sup> from IC<sub>50</sub> values calculated by non-linear regression analysis of specific binding data using GraphPad Prism software (San Diego, CA). In cases where there was only ~50% AR binding inhibition at 10 μM, an estimated K<sub>i</sub> of ~10 μM was used in approximating the selectivity ratio.

For one compound, activation of the Gs-coupled human A<sub>2B</sub>AR stably expressed in CHO cells was measured as described.<sup>6</sup>

## References:

1. Carlin, J. L.; Jain, S.; Gizewski, E.; Wan, T. C.; Tosh, D. K.; Xiao, C.; Auchampach, J. A.; Jacobson, K. A.; Gavriloiva, O.; Reitman, M. L. Hypothermia in mouse is caused by adenosine A<sub>1</sub> and A<sub>3</sub> receptor agonists and AMP via three distinct mechanisms. *Neuropharmacology* **2017**, *114*, 101–113.
2. Tosh, D. K.; Paoletta, S.; Deflorian, F.; Phan, K.; Moss, S. M.; Gao, Z. G.; Jiang, X.; Jacobson, K. A. Structural sweet spot for A<sub>1</sub> adenosine receptor activation by truncated (N)-methanocarpa nucleosides: Receptor docking and potent anticonvulsant activity. *J. Med. Chem.* **2012**, *55*, 8075–8090.
3. Tosh, D. K.; Ciancetta, A.; Warnick, E.; Crane, S.; Gao, Z. G.; Jacobson, K. A. Structure-based scaffold repurposing for G protein-coupled receptors: Transformation of adenosine derivatives into 5HT<sub>2B</sub>/5HT<sub>2C</sub> serotonin receptor antagonists. *J. Med. Chem.* **2016**, *59*, 11006–11026.
4. Kreckler, L.M.; Wan, T.C.; Ge, Z.D.; Auchampach, J.A. Adenosine inhibits tumor necrosis factor- $\alpha$  release from mouse peritoneal macrophages via A<sub>2A</sub> and A<sub>2B</sub> but not the A<sub>3</sub> adenosine receptor. *J. Pharmacol. Exp. Ther.* **2006**, *317* (1), 172e180.
5. Cheng, Y. C.; Prusoff, W. H. Relationship between the inhibition constant ( $K_i$ ) and the concentration of inhibitor which causes 50 per cent inhibition ( $I_{50}$ ) of an enzymatic reaction. *Biochem. Pharmacol.* **1973**, *22*, 3099–3108.
6. Jacobson, K.A.; Ohno, M.; Duong, H.T.; Kim, S.K.; Tchilibon, S.; Cesnek, M.; Holy, A.; Gao, Z.G. A neoceptor approach to unraveling microscopic interactions between the human A<sub>2A</sub> adenosine receptor and its agonists. *Chemistry and Biology* **2005**, *12*, 237-247.

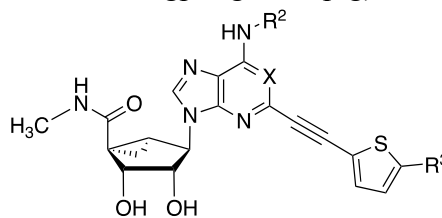

**4, 11 – 19**

| Compd.<br>(MRS#,<br>PDSP#)    | R <sup>2</sup> , R <sup>3</sup> , X | Off-target binding,<br>K <sub>i</sub> , μM (or IC <sub>50</sub> <sup>f</sup> ),<br>or % inhibition <sup>a</sup> |
|-------------------------------|-------------------------------------|-----------------------------------------------------------------------------------------------------------------|
| <b>6</b><br>MRS7294<br>42206  | Me, Cl, N                           | DAT -134%                                                                                                       |
| <b>7</b><br>MRS7295<br>42207  | <i>n</i> -Pr, Cl, N                 | DAT -41%                                                                                                        |
| <b>8</b><br>MRS7432<br>49028  | Me, F, N                            | DAT -234%,<br>σ <sub>2</sub> 1.83                                                                               |
| <b>9</b><br>MRS7433<br>49029  | <i>n</i> -Pr, F, N                  | DAT -40%,<br>σ <sub>1</sub> 3.26 (gp), σ <sub>2</sub> 0.98                                                      |
| <b>10</b><br>MRS7424<br>48846 | Me, F, CH                           | σ <sub>2</sub> 2.22                                                                                             |
| <b>4</b><br>MRS5980           | Me, Cl, N                           | DAT -556%,<br>TSPO 0.68±0.18,<br>σ <sub>1</sub> 1.40 (gp),<br>σ <sub>2</sub> 0.527±0.088                        |
| <b>11</b><br>MRS7135          | Et, Cl, N                           | DAT -329%                                                                                                       |
| <b>12</b><br>MRS7154          | <i>n</i> -Pr, Cl, N                 | DAT -159%, TSPO<br>1.31±0.21, β <sub>3</sub> 1.44                                                               |
| <b>13</b><br>MRS7140          | Me, Cl, CH                          | σ <sub>2</sub> 3.11 (gp), β <sub>3</sub> 1.96                                                                   |
| <b>14</b><br>MRS7144          | Et, Cl, CH                          | 5HT <sub>2B</sub> 2.21±0.34, TSPO<br>3.21, β <sub>3</sub> 1.44                                                  |
| <b>15</b><br>MRS7161<br>48644 | <i>n</i> -Pr, Cl,<br>CH             | 5HT <sub>2B</sub> 0.76, β <sub>3</sub> 1.68,<br>DAT 3.94, TSPO 4.83,<br>σ <sub>2</sub> , 1.27                   |

|                                           |                          |                                                           |
|-------------------------------------------|--------------------------|-----------------------------------------------------------|
| <b>16</b><br>MRS7334<br>44294             | Me, F, N                 | DAT -144%, TSPO, 3.38                                     |
| <b>17</b><br>MRS7426<br>48994             | <i>n</i> -Pr, F, N       | $\sigma_2$ 1.87, DAT -212%                                |
| <b>18</b><br>MRS7345<br>44510             | Me, F, CH                | $\beta_3$ 1.96                                            |
| <b>19</b><br>MRS7346<br>44511             | Et, F, CH                | $\beta_3$ 3.34                                            |
| <b>20</b><br>MRS7296<br>42208             | 5'-ester,<br>See Table 1 | 5HT <sub>2C</sub> 3.24±1.05,<br>DAT -99%                  |
| <b>21<sup>b</sup></b><br>MRS7292<br>42073 | 5'-ester,<br>See Table 1 | KOR 3.13±0.53,<br>DAT -240%                               |
| <b>22<sup>b</sup></b><br>MRS7332<br>44512 | 5'-ester,<br>See Table 1 | KOR 0.806±0.263<br>TSPO 4.13±0.33<br>$\sigma_2$ 1.66±0.38 |
| <b>23</b><br>MRS7333<br>44293             | 5'-ester,<br>See Table 1 | KOR 2.65±0.37,<br>DAT -228%, $\sigma_1$ 4.04 (gp)         |

**Figure S1. PDSP Off-target screening, representative binding curves (human, unless noted).**

Unless noted in the text, no significant interactions (<50% inhibition at 10  $\mu$ M) for any of the nucleosides were found at the following sites (human unless noted): 5HT<sub>1A</sub>, 5HT<sub>1B</sub>, 5HT<sub>1D</sub>, 5HT<sub>1E</sub>, 5HT<sub>2A</sub>, 5HT<sub>2B</sub>, 5HT<sub>2C</sub>, 5HT<sub>3</sub>, 5HT<sub>5A</sub>, 5HT<sub>6</sub>, 5HT<sub>7</sub>,  $\alpha_{1A}$ ,  $\alpha_{1B}$ ,  $\alpha_{1D}$ ,  $\alpha_{2A}$ ,  $\alpha_{2B}$ ,  $\alpha_{2C}$ ,  $\beta_1$ ,  $\beta_2$ ,  $\beta_3$ , BZP rat brain site, D<sub>1</sub>, D<sub>2</sub>, D<sub>3</sub>, D<sub>4</sub>, D<sub>5</sub>, delta opioid receptor (DOR), GABA<sub>A</sub>, H<sub>1</sub>, H<sub>2</sub>, H<sub>3</sub>, H<sub>4</sub>, M<sub>1</sub>, M<sub>2</sub>, M<sub>5</sub>, mu opioid receptor (MOR),  $\sigma_1$ ,  $\sigma_2$ , DAT, NET, SERT. Representative curves are shown.

DAT inhibition by compound **8** (MRS7432, 49028).

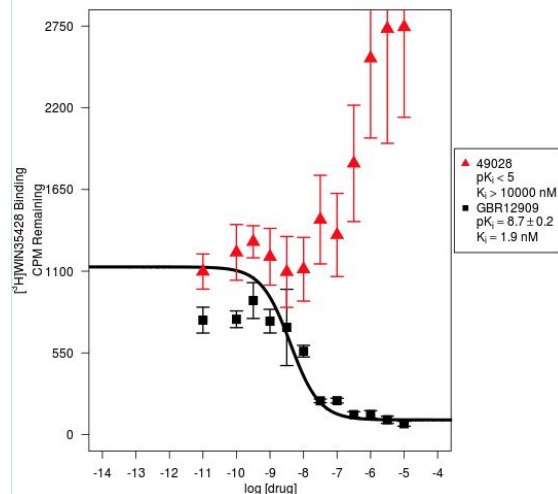

$\sigma_1$ R (gp) inhibition by compound **9** (MRS7433, 49029).

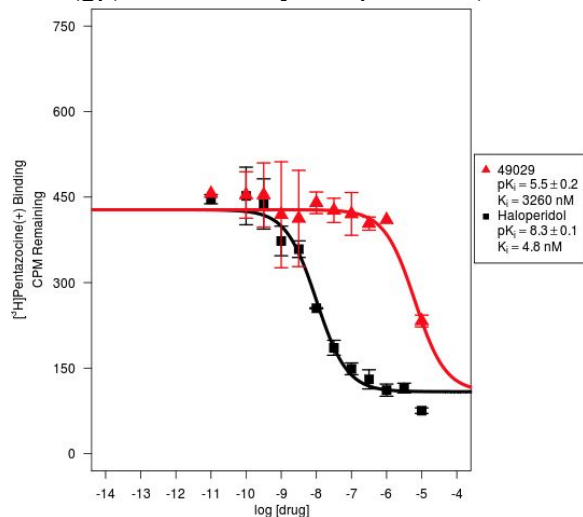

$\sigma_2$ R inhibition by compound **9** (MRS7433, 49029).

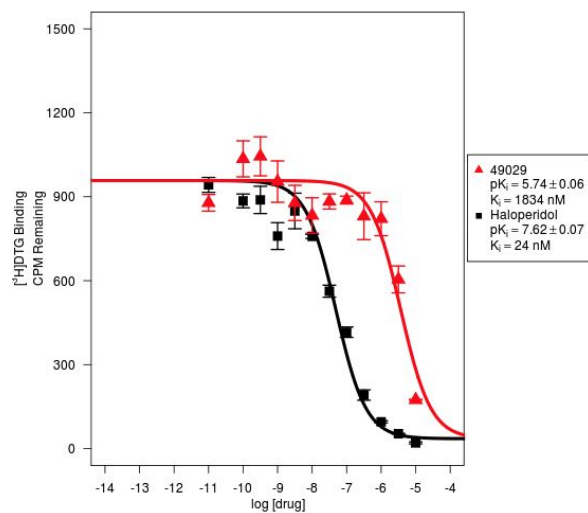

DAT inhibition by compound **15** (MRS7161, 48644).

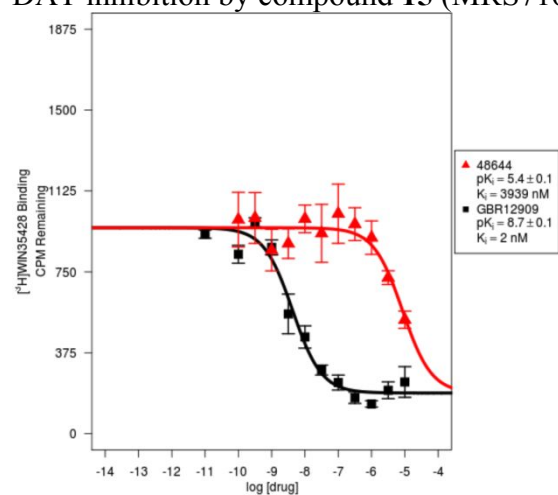

5HT<sub>2B</sub>R inhibition by compound **15** (MRS7161, 48644).

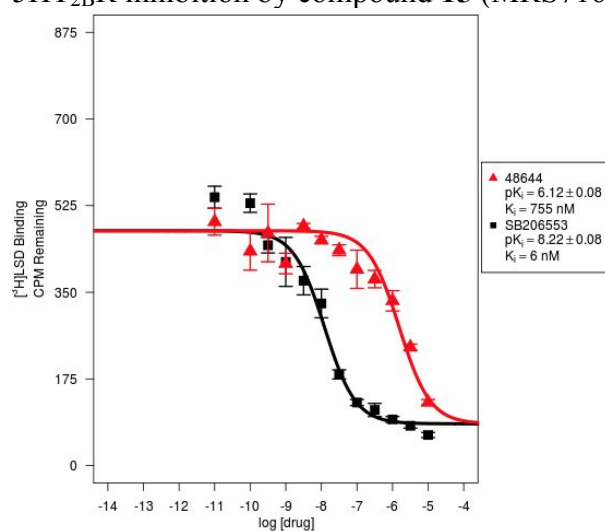

$\beta_3\text{R}$  inhibition by compound **19** (MRS7346, 44511).

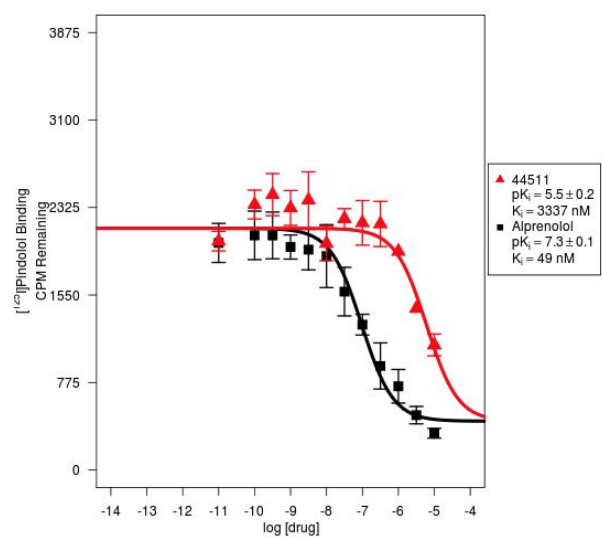

**Figure S2.** Rat PK of A<sub>3</sub>AR selective nucleosides **4** (A), **11** (B), **14** (C), **16** (D) and **17** (E) (GVK Biosciences, Hyderabad, India.).

A

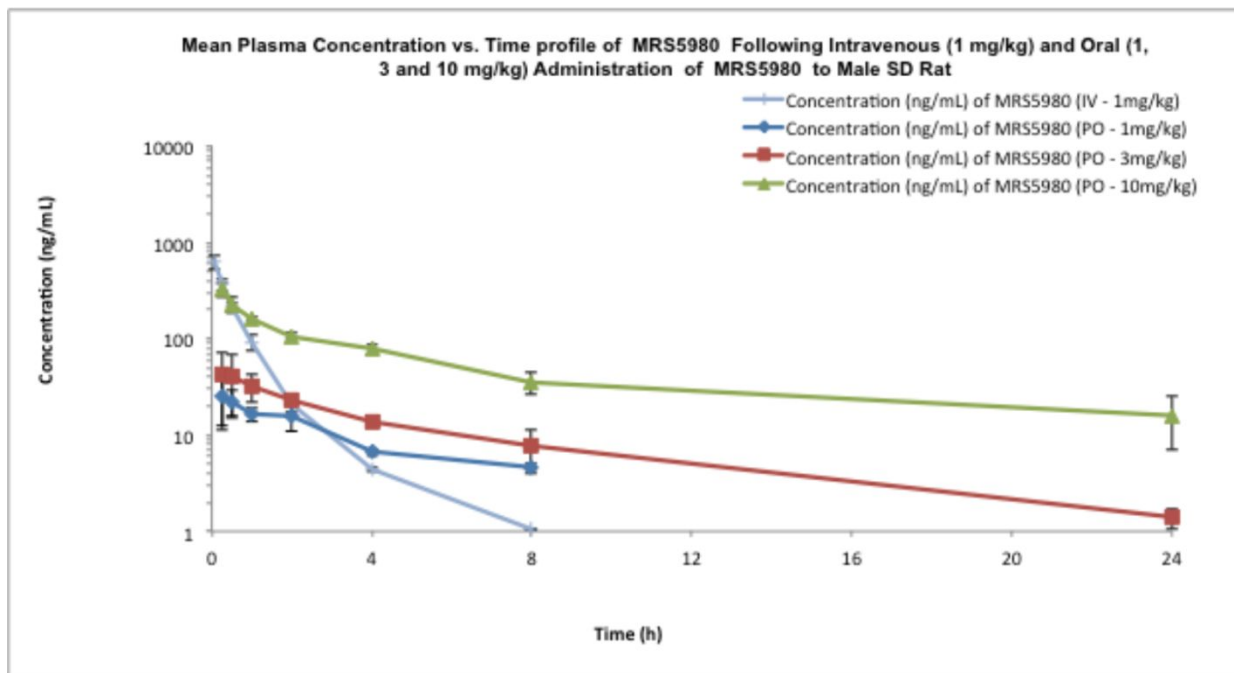

|                      | i.v.      |           | p.o.      |           |
|----------------------|-----------|-----------|-----------|-----------|
|                      | 1 mg/kg   | 1 mg/kg   | 3 mg/kg   | 10 mg/kg  |
| Bioavailability      |           | 22 ± 0.3  | 19 ± 3.5  | 33 ± 2.2  |
| t <sub>1/2</sub> (h) | 0.7 ± 0.3 | 3.6 ± 0.4 | 5.3 ± 0.8 | 7.8 ± 2.0 |
| C <sub>max</sub>     |           |           |           |           |
| ng/ml                |           | 29 ± 8.6  | 47 ± 24   | 326 ± 57  |
| nM                   |           | 63 ± 19   | 101 ± 53  | 711 ± 125 |



B

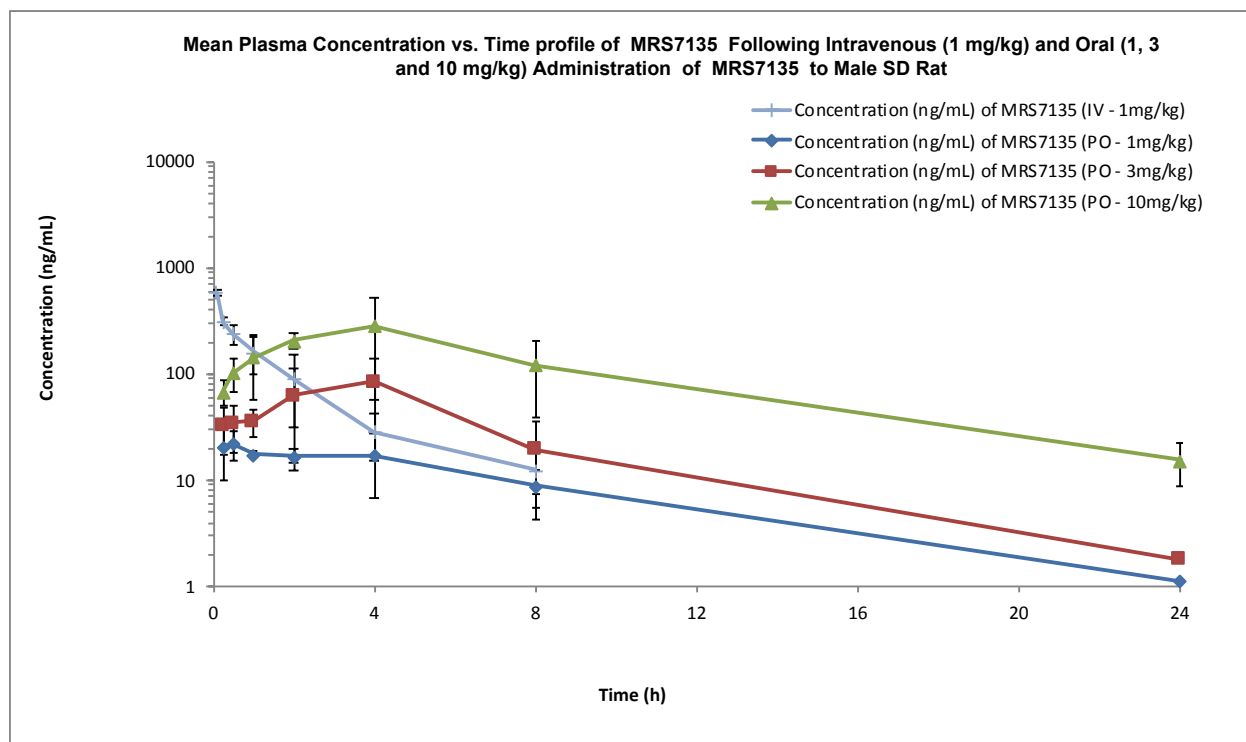

| Parameter                          | 1 mg/kg   | 3 mg/kg   | 10 mg/kg  |
|------------------------------------|-----------|-----------|-----------|
| $t_{1/2}$ (h), oral administration | 7.07±1.25 | 3.31±0.88 | 5.33±2.13 |
| Bioavailability (%F)               | 22.3±3.0  | 26.6±18.1 | 37.9±13.3 |

C

**Mean Plasma Concentration vs. Time profile of MRS7144 Following Intravenous (1 mg/kg) and Oral (1, 3 and 10 mg/kg) Administration of MRS7144 to Male SD Rat**

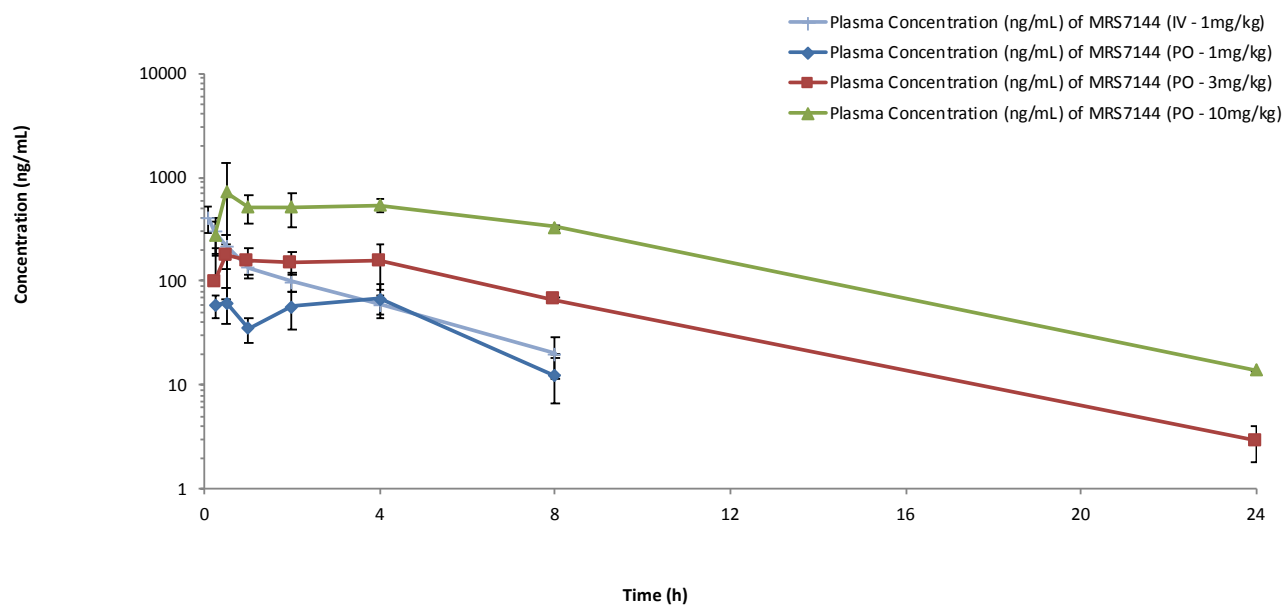

|                                 | IV-1 mg/kg | PO-1 mg/kg | PO-3 mg/kg | PO-10 mg/kg |
|---------------------------------|------------|------------|------------|-------------|
| AUC <sub>0-last</sub> (ng·h/mL) | 711.99     | 342.56     | 1331.04    | 5314.92     |
| AUC <sub>0-inf</sub> (ng·h/mL)  | 745.00     | 390.47     | 1345.65    | 5389.32     |
| Bioavailability                 | ---        | 52.41      | 60.21      | 72.34       |
| t <sub>1/2</sub> (hr)           | 2.62±0.90  | 2.53±0.49  | 3.50±0.04  | 3.71±0.14   |

D

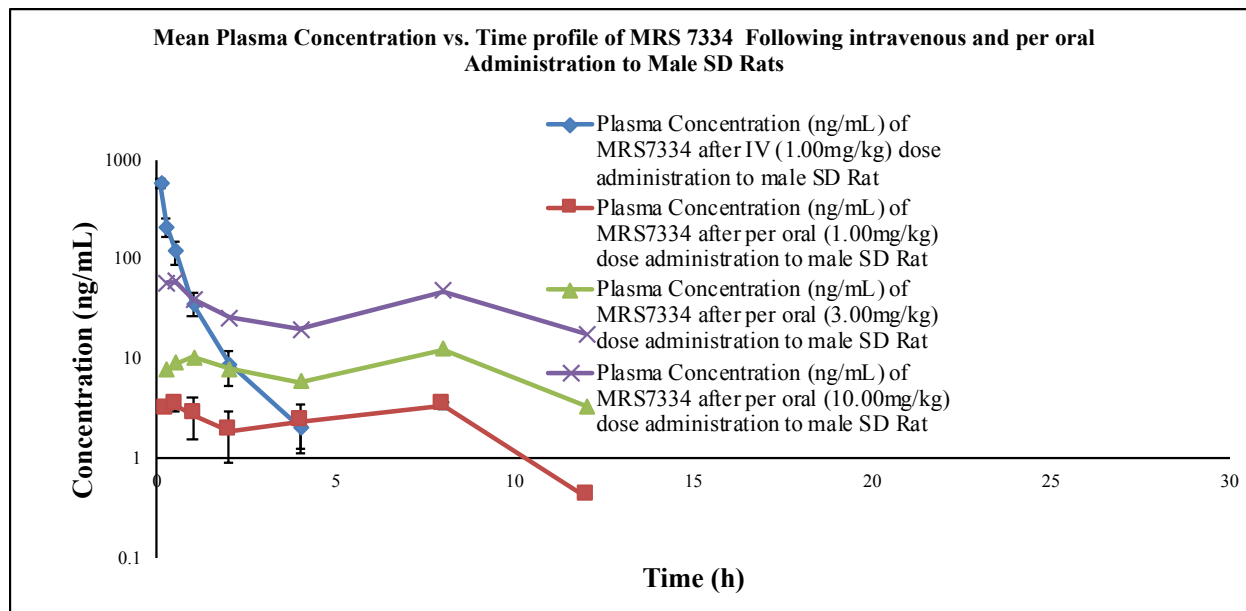

| Parameter (MRS7334)             | Mean          | St Dev | %CV    |
|---------------------------------|---------------|--------|--------|
| Dose (mg/kg)                    | <b>10.00</b>  | 0.00   | 0.00   |
| C <sub>max</sub> (ng/mL)        | <b>66.35</b>  | 9.23   | 13.91  |
| T <sub>max</sub> (h)            | <b>2.83</b>   | 4.47   | 157.92 |
| AUC <sub>0-last</sub> (ng·h/mL) | <b>400.60</b> | 120.48 | 30.08  |
| AUC <sub>0-inf</sub> (ng·h/mL)  | <b>622.74</b> | 451.15 | 72.45  |
| AUC <sub>Extra</sub> (%)        | <b>30.94</b>  | 24.69  | 79.80  |
| MRT <sub>0-last</sub> (h)       | <b>5.78</b>   | 0.76   | 13.14  |
| F (%)                           | <b>14.48</b>  | 0.94   | 6.51   |
| Rsq                             | <b>0.54</b>   | 0.24   | 45.11  |

E

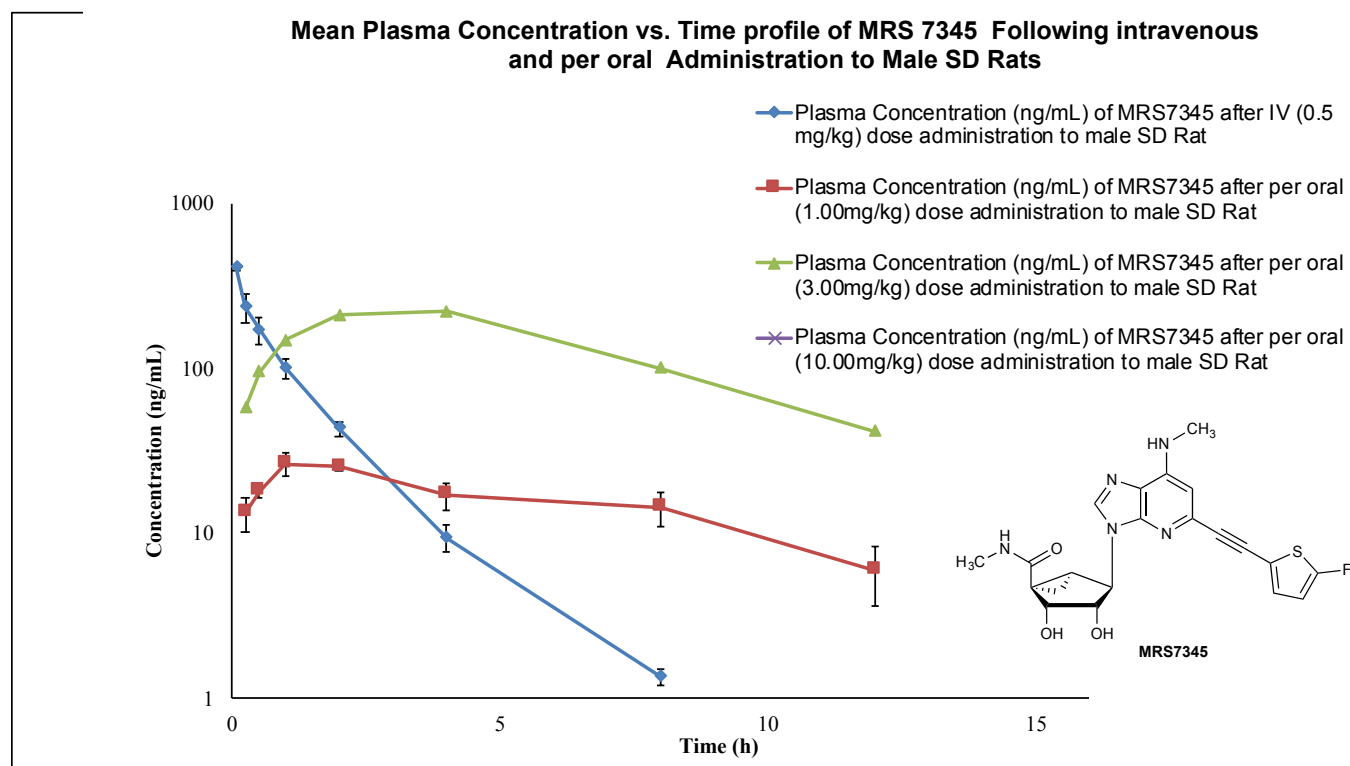

|                                 | IV-1 mg/kg | PO-1 mg/kg | PO-3 mg/kg | PO-10 mg/kg |
|---------------------------------|------------|------------|------------|-------------|
| AUC <sub>0-last</sub> (ng·h/mL) | 503.86     | 185.8±10.5 | 1566±608   | -           |
| AUC <sub>0-inf</sub> (ng·h/mL)  | 512.53     | 237.3±43.1 | 1578±602   | -           |
| Bioavailability (%F)            | --         | 28.3±1.1   | 98.9±37.7  | -           |
| t <sub>max</sub>                | -          | 1.33±0.58  | 2.67±1.15  | -           |

t<sub>1/2</sub>                      1.12±0.10                      -                      -

**Table S2.** In vitro and in vivo ADME-tox data for five representative A<sub>3</sub>AR (N)-methanocarpa agonists, determined by GVK Biosciences, Hyderabad, India..<sup>a</sup>

| Test                                                                                         | <b>4,<br/>MRS5980<sup>b</sup></b>  | <b>11,<br/>MRS7135<sup>b</sup></b> | <b>14,<br/>MRS7144<sup>b</sup></b>   | <b>16,<br/>MRS7334</b>           | <b>17,<br/>MRS7345</b>             |
|----------------------------------------------------------------------------------------------|------------------------------------|------------------------------------|--------------------------------------|----------------------------------|------------------------------------|
| Simulated gastric fluid<br>(% remaining, min)                                                | 100 (120)                          | 92.9 (240)                         | 89.5 (240)                           | 100 (120)                        | ND                                 |
| Simulated intestinal fluid<br>(% remaining, min)                                             | 100 (120)                          | 91.7 (240)                         | 100 (240)                            | 86.2 (120)                       | ND                                 |
| CYP1A2 (IC <sub>50</sub> , μM)                                                               | >10                                | >10                                | >10                                  | >30                              | >30                                |
| CYP2C9 (IC <sub>50</sub> , μM)                                                               | >10                                | >10                                | >10                                  | >30                              | >30                                |
| CYP2C19 (IC <sub>50</sub> , μM)                                                              | >10                                | >10                                | >10                                  | >30                              | >30                                |
| CYP2D6 (IC <sub>50</sub> , μM)                                                               | >10                                | >10                                | >10                                  | >30                              | >30                                |
| CYP3A4 (IC <sub>50</sub> , μM)                                                               | >10                                | >10                                | >10                                  | >30                              | >30                                |
| Plasma stability, 3 species <sup>d</sup><br>(% remaining at 120 min)                         | 97.1 (h);<br>100 (r);<br>100 (m)   | 99.0 (h);<br>93.9 (r);<br>100 (m)  | 86.4 (h);<br>93.2 (r);<br>100 (m)    | 100 (h);<br>100 (r);<br>97.3 (m) | 98.1 (h);<br>81.5 (r);<br>96.0 (m) |
| Plasma protein binding,<br>3 species <sup>d</sup> (%)                                        | 93.8 (h);<br>94.1 (r);<br>93.6 (m) | 97.0 (h);<br>93.9 (r);<br>96.8 (m) | 99.64 (h);<br>99.22 (r);<br>99.5 (m) | ND                               | ND                                 |
| CACO2 permeability<br>(P <sub>app</sub> , A to B (10 <sup>-6</sup> cm/sec);<br>efflux ratio) | 2.20;<br>16.2                      | 0.80;<br>40.1                      | 2.05;<br>6.40                        | 0.87;<br>53.1                    | 4.89;<br>9.57                      |
| Liver microsomal stability,<br>3 species <sup>d</sup> (t <sub>1/2</sub> , min)               | 230 (h),<br>128 (r),<br>143 (m)    | 203 (h),<br>155 (r),<br>95.4 (m)   | 145 (h),<br>104 (r),<br>98.6 (m)     | 141 (h),<br>145 (r),<br>117 (m)  | 60.6 (h),<br>41.9 (r),<br>117 (m)  |
| HEP G2 cell toxicity, CC <sub>50</sub><br>(μM)                                               | >100                               | >30                                | ND                                   | >30                              | ND                                 |
| aqueous solubility <sup>c</sup><br>(pH 7.4, unless noted,<br>μg/mL)                          | 16.8±1.1;<br>19.7±0.5<br>(pH 4.0)  | 4.22                               | 5.37±0.48                            | ND                               | 167±5                              |

<sup>a</sup> Procedure is in the Supporting Information of Tosh et al., *J. Med. Chem.*, 2014, 57: 9901-9914.

<sup>b</sup> Compounds previously reported in Tosh et al.: 1) *J. Med. Chem.*, 2014, 57: 9901-9914; 2) *ACS Med. Chem. Lett.*, 2015, 6:804-808.

<sup>c</sup> Mean ± SD, pION method.

<sup>d</sup> Species tested were human, rat and mouse; species as indicated.

## ***Molecular Modeling***

### ***Ligand-Protein Complex Preparation***

A homology model of hA<sub>3</sub>AR was retrieved from a previous work, where it was built with the Prime knowledge-based method<sup>1,2</sup>, using as templates a structure of hA<sub>2A</sub>AR (3QAK<sup>3</sup>, plus 4UHR<sup>4</sup> to model IL3) for the greater part of the receptor and a structure of hA<sub>1</sub>AR (5UEN<sup>5</sup>) for TM2. The Protein Preparation Wizard tool<sup>6</sup> of the Schrödinger suite (Maestro 2019-1)<sup>7</sup> was used to assign the histidines protonation and tautomeric states, with His79, His95, His124 and His158 protonated at N<sup>ε</sup> nitrogen (named HSE according to the CHARMM nomenclature), while His272 protonated at N<sup>δ</sup> (HSD). The Ballesteros-Weinstein<sup>8</sup> numbering was used throughout the manuscript to define the residues of the receptor.

Ligands were drawn using the Schrödinger suite (Maestro 2019-1)<sup>7</sup> and minimized using the OPLS3 force field.<sup>9</sup>

### ***Molecular Docking***

Compounds **16** and **8** were docked to the hA<sub>3</sub>AR homology model with Glide-XP<sup>10</sup> scoring function, on a grid of 30 Å side, centered on Asn250 (Asn6.55) and Phe168 (EL2). Successively, a pose was selected for each compound by visual inspection.

### ***Molecular Dynamics***

The systems obtained from docking were prepared for MD simulations employing the HTMD<sup>11</sup> module, adding to the system a water molecule mediating the interaction among Asn250 (Asn6.55), Ser247 (Ser6.52) and Met177 (Met5.38), as previously reported.<sup>12</sup> Each protein-ligand complex was oriented using the Positioning of Proteins in Membrane (PPM)<sup>13</sup> web server and inserted into a 90 Å x 90 Å 1-palmitoyl-2-oleoyl-sn-glycero-3-phosphocholine (POPC) lipid bilayer generated with the VMD Membrane Plugin.<sup>14</sup> Each system was solvated with TIP3P<sup>15</sup> water molecules (with a positive and negative padding of 15 Å on the *z* axis) and neutralized with Na<sup>+</sup>/Cl<sup>-</sup> counter-ions, added to reach a concentration of 0.154 M.

The compounds were also simulated in the free (unbound) state: they were inserted at the center of a 40 Å sided water box and simulated in the conditions discussed below.

The simulations were carried out employing CHARMM36<sup>16,17</sup> force field for protein, lipids, water and ions, CGenFF<sup>18,19</sup> force field for the ligand, and ACEMD<sup>20</sup> as molecular dynamics engine.

Missing ligand parameters were assigned by analogy using the ParamChem<sup>21</sup> web service, with few modifications on the (N)-methanocarba parameters, assigned manually according to the carbocyclic parameters present in the CGenFF.

The initial system was minimized through 5000 conjugate-gradient steps and equilibrated for 40 ns MD simulation in the NPT ensemble, where positional harmonic restraints were applied to ligand and protein atoms (0.8 kcal mol<sup>-1</sup> Å<sup>-2</sup> for ligand atoms, 0.85 kcal mol<sup>-1</sup> Å<sup>-2</sup> for Cα carbon atoms, and 0.4 kcal mol<sup>-1</sup> Å<sup>-2</sup> for the other protein atoms) and linearly reduced in the last 20 ns. After equilibration, three 30 ns replicates of MD simulations were run for each system in the NVT ensemble. The pressure was maintained at around 1 atm by a Berendsen barostat (relaxation time 800 fs) during equilibration and temperature was kept at around 310 K by a Langevin thermostat (damping constant 1 ps<sup>-1</sup> and 0.1 ps<sup>-1</sup> for equilibration and production, respectively). The timestep was set to 2 fs in all the simulations and the M-SHAKE<sup>22</sup> algorithm was used to constrain bonds containing hydrogen atoms. A 9 Å cutoff was employed for non-bonded interactions, with a switching distance of 7.5 Å, and the long-range electrostatic interactions beyond the cutoff were computed with the Particle Mesh Ewald (PME)<sup>23</sup> method (1 Å grid spacing).

### Trajectory Analysis

An in-house Tcl script employing VMD 1.9.3 was used to analyze the MD trajectories.<sup>14</sup> The systems were aligned to their initial conformation by superposing protein C $\alpha$  carbon atoms. Ligand-protein electrostatic and van der Waals interactions were computed with NAMD.<sup>24</sup> The data were plotted using the Gnuplot (version 5.0) software.<sup>25</sup>

The puckering parameters (phase angle of pseudorotation ( $P$ ) and degree of deformation from the plane ( $\nu_{max}$ )) were computed with an in-house python2.7 script, employing the ProDy<sup>26</sup> and matplotlib<sup>27</sup> modules.

### References:

1. Jacobson, M. P.; Pincus, D. L.; Rapp, C. S.; Day, T. J. F.; Honig, B.; Shaw, D. E.; Friesner, R. A. A Hierarchical Approach to All-Atom Protein Loop Prediction. *Proteins* **2004**, 55 (2), 351–367.
2. Jacobson, M. P.; Friesner, R. A.; Xiang, Z.; Honig, B. On the Role of the Crystal Environment in Determining Protein Side-Chain Conformations. *J. Mol. Biol.* **2002**, 320 (3), 597–608.
3. Xu, F.; Wu, H.; Katritch, V.; Han, G. W.; Jacobson, K. A.; Gao, Z.-G.; Cherezov, V.; Stevens, R. C. Structure of an Agonist-Bound Human A2A Adenosine Receptor. *Science* **2011**, 332 (6027), 322–327.
4. Lebon, G.; Edwards, P. C.; Leslie, A. G. W.; Tate, C. G. Molecular Determinants of CGS21680 Binding to the Human Adenosine A2A Receptor. *Mol. Pharmacol.* **2015**, 87 (6), 907–915.
5. Glukhova, A.; Thal, D. M.; Nguyen, A. T.; Vecchio, E. A.; Jörg, M.; Scammells, P. J.; May, L. T.; Sexton, P. M.; Christopoulos, A. Structure of the Adenosine A1 Receptor Reveals the Basis for Subtype Selectivity. *Cell* **2017**, 168 (5), 867–877.e13.
6. Sastry, G. M.; Adzhigirey, M.; Day, T.; Annabhimoju, R.; Sherman, W. Protein and Ligand Preparation: Parameters, Protocols, and Influence on Virtual Screening Enrichments. *J. Comput. Aided Mol. Des.* **2013**, 27 (3), 221–234.
7. Schrödinger Release 2019-3: Maestro, Schrödinger, LLC, New York, NY, 2019.
8. Ballesteros, J. A.; Weinstein, H. [19] Integrated Methods for the Construction of Three-Dimensional Models and Computational Probing of Structure-Function Relations in G Protein-Coupled Receptors. In *Receptor Molecular Biology*; Methods in Neurosciences; Elsevier, 1995; Vol. 25, pp 366–428.
9. Harder, E.; Damm, W.; Maple, J.; Wu, C.; Reboul, M.; Xiang, J. Y.; Wang, L.; Lupyan, D.; Dahlgren, M. K.; Knight, J. L.; et al. OPLS3: A Force Field Providing Broad Coverage of Drug-like Small Molecules and Proteins. *J. Chem. Theory Comput.* **2016**, 12 (1), 281–296.
10. Friesner, R. A.; Murphy, R. B.; Repasky, M. P.; Frye, L. L.; Greenwood, J. R.; Halgren, T. A.; Sanschagrin, P. C.; Mainz, D. T. Extra Precision Glide: Docking and Scoring Incorporating a Model of Hydrophobic Enclosure for Protein-Ligand Complexes. *J. Med. Chem.* **2006**, 49 (21), 6177–6196.
12. Tosh, D. K.; Salmaso, V.; Rao, H.; Bitant, A.; Fisher, C. L.; Lieberman, D. I.; Vorbrüggen, H.; Reitman, M. L.; Gavrilova, O.; Gao, Z. G.; Auchampach, J. A.; Jacobson, K. A. Truncated (N)-methanocarba nucleosides as partial agonists at mouse and human A<sub>3</sub> adenosine receptors: Affinity enhancement by N<sup>6</sup>-(2-phenylethyl) substitution. J. Med. Chem., ACS Spring 2020 National Meeting & Exposition, Philadelphia, PA, Abstr. MEDI150.

11. Doerr, S.; Harvey, M. J.; Noé, F.; De Fabritiis, G. HTMD: High-Throughput Molecular Dynamics for Molecular Discovery. *J. Chem. Theory Comput.* **2016**, *12* (4), 1845–1852.
13. Lomize, M. A.; Pogozheva, I. D.; Joo, H.; Mosberg, H. I.; Lomize, A. L. OPM Database and PPM Web Server: Resources for Positioning of Proteins in Membranes. *Nucleic Acids Res.* **2012**, *40* (Database issue), D370–6.
14. Humphrey, W.; Dalke, A.; Schulten, K. VMD: Visual Molecular Dynamics. *J. Mol. Graph.* **1996**, *14* (1), 33–38, 27.
15. Jorgensen, W. L.; Chandrasekhar, J.; Madura, J. D.; Impey, R. W.; Klein, M. L. Comparison of Simple Potential Functions for Simulating Liquid Water. *J. Chem. Phys.* **1983**, *79* (2), 926.
16. Best, R. B.; Zhu, X.; Shim, J.; Lopes, P. E. M.; Mittal, J.; Feig, M.; Mackerell, A. D. Optimization of the Additive CHARMM All-Atom Protein Force Field Targeting Improved Sampling of the Backbone  $\phi$ ,  $\psi$  and Side-Chain  $\chi(1)$  and  $\chi(2)$  Dihedral Angles. *J. Chem. Theory Comput.* **2012**, *8* (9), 3257–3273.
17. Klauda, J. B.; Venable, R. M.; Freites, J. A.; O'Connor, J. W.; Tobias, D. J.; Mondragon-Ramirez, C.; Vorobyov, I.; MacKerell, A. D.; Pastor, R. W. Update of the CHARMM All-Atom Additive Force Field for Lipids: Validation on Six Lipid Types. *J. Phys. Chem. B* **2010**, *114* (23), 7830–7843.
18. Vanommeslaeghe, K.; MacKerell, A. D. Automation of the CHARMM General Force Field (CGenFF) I: Bond Perception and Atom Typing. *J. Chem. Inf. Model.* **2012**, *52* (12), 3144–3154.
19. Vanommeslaeghe, K.; Raman, E. P.; MacKerell, A. D. Automation of the CHARMM General Force Field (CGenFF) II: Assignment of Bonded Parameters and Partial Atomic Charges. *J. Chem. Inf. Model.* **2012**, *52* (12), 3155–3168.
20. Harvey, M. J.; Giupponi, G.; Fabritiis, G. D. ACEMD: Accelerating Biomolecular Dynamics in the Microsecond Time Scale. *J. Chem. Theory Comput.* **2009**, *5* (6), 1632–1639.
21. CHARMM General Force Field (CGenFF) program, <https://cgenff.umaryland.edu/>
22. Kräutler, V.; van Gunsteren, W. F.; Hünenberger, P. H. A Fast SHAKE Algorithm to Solve Distance Constraint Equations for Small Molecules in Molecular Dynamics Simulations. *J. Comput. Chem.* **2001**, *22* (5), 501–508.
23. Essmann, U.; Perera, L.; Berkowitz, M. L.; Darden, T.; Lee, H.; Pedersen, L. G. A Smooth Particle Mesh Ewald Method. *J. Chem. Phys.* **1995**, *103* (19), 8577.
24. Phillips, J. C.; Braun, R.; Wang, W.; Gumbart, J.; Tajkhorshid, E.; Villa, E.; Chipot, C.; Skeel, R. D.; Kalé, L.; Schulten, K. Scalable Molecular Dynamics with NAMD. *J. Comput. Chem.* **2005**, *26* (16), 1781–1802.
25. Williams, T.; Kelley, C. Gnuplot 5.0, <http://www.gnuplot.info>
26. Bakan, A.; Meireles, L. M.; Bahar, I. ProDy: Protein Dynamics Inferred from Theory and Experiments. *Bioinformatics* **2011**, *27* (11), 1575–1577.
27. Hunter, J. D. Matplotlib: A 2D Graphics Environment. *Comput. Sci. Eng.* **2007**, *9* (3), 90–95.



Table S3

| Compound                        |                | Cmp 8 (MRS7432) |            |            | Cmp 16 (MRS7334) |            |            |
|---------------------------------|----------------|-----------------|------------|------------|------------------|------------|------------|
| Replicates                      |                | 1               | 2          | 3          | 1                | 2          | 3          |
| RMSD <sub>ave</sub> (Å)         |                | 1.85            | 1.60       | 1.84       | 2.03             | 1.84       | 2.21       |
| En <sub>ave</sub><br>(kcal/mol) | Ele            | -<br>25.85      | -<br>26.10 | -<br>25.30 | -<br>29.51       | -<br>22.39 | -<br>25.38 |
|                                 | vdW            | -<br>38.33      | -<br>39.05 | -<br>38.70 | -<br>46.54       | -<br>42.46 | -<br>42.75 |
|                                 | Total          | -<br>64.18      | -<br>65.15 | -<br>64.00 | -<br>76.05       | -<br>64.85 | -<br>68.13 |
| Hydrogen Bonds                  | Thr94<br>3.36  | 88%             | 82%        | 86%        | 69%              | 69%        | 43%        |
|                                 | Asn250<br>6.55 | 93%             | 96%        | 86%        | 88%              | 89%        | 89%        |
|                                 | Ser271<br>7.42 | 23%             | 38%        | 14%        | 1%               | 10%        | 5%         |
|                                 | His272<br>7.43 | 3%              | 6%         | 4%         | 84%              | 0%         | 50%        |

**Table S3.** Summary of the MD trajectories analysis of the complexes between hA<sub>3</sub> AR and compounds **8** and **16**. The following average values are reported: the average root mean square deviation of the ligand heavy atoms relative to the docking pose (RMSD<sub>ave</sub>), after alignment of the protein Cα atoms to the starting structure; the average ligand-receptor electrostatic (Ele), van der Waals (vdW) and sum of the two (Total) interaction energy (En<sub>ave</sub>). The percentages of frames showing hydrogen bonds between the ligand and Thr94 (3.36), Asn250 (6.55), Ser271 (7.42) and His272 (7.43) are indicated. The replicates discussed in the manuscript (selected on the basis of the lowest average total interaction energy) are highlighted in red.

Figure S3

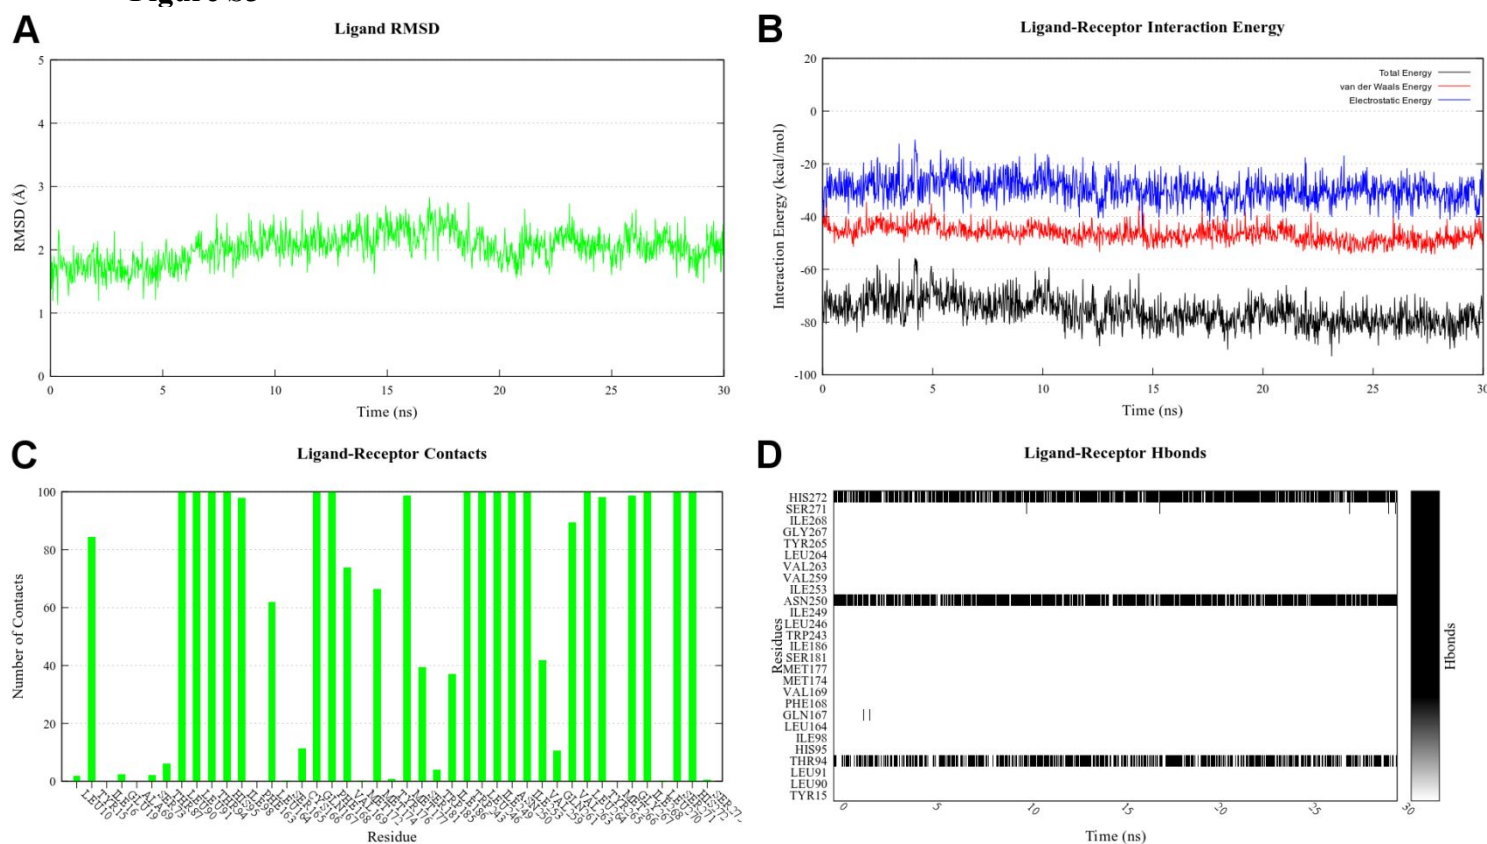

**Figure S3.** Analysis of the MD simulation (replicate 1) of the complex between compound **16** and hA<sub>3</sub>AR. The replicate was chosen on the basis of the lowest average total interaction energy. **A**) RMSD of ligand heavy atoms relative to the docking pose, after alignment of the protein Ca atoms to the starting structure. **B**) Electrostatic and van der Waals (and Total, as sum of the two) ligand-receptor interaction energy. **C**) Histograms showing the percentage of time where each protein residue is in contact (distance < 4 Å) with the ligand. Residues with 0 contacts during the simulations are not reported. **D**) Presence of hydrogen bonds during the simulation for selected residues (residues that are in contact with the ligand at least for one third of the simulation).

Figure S4

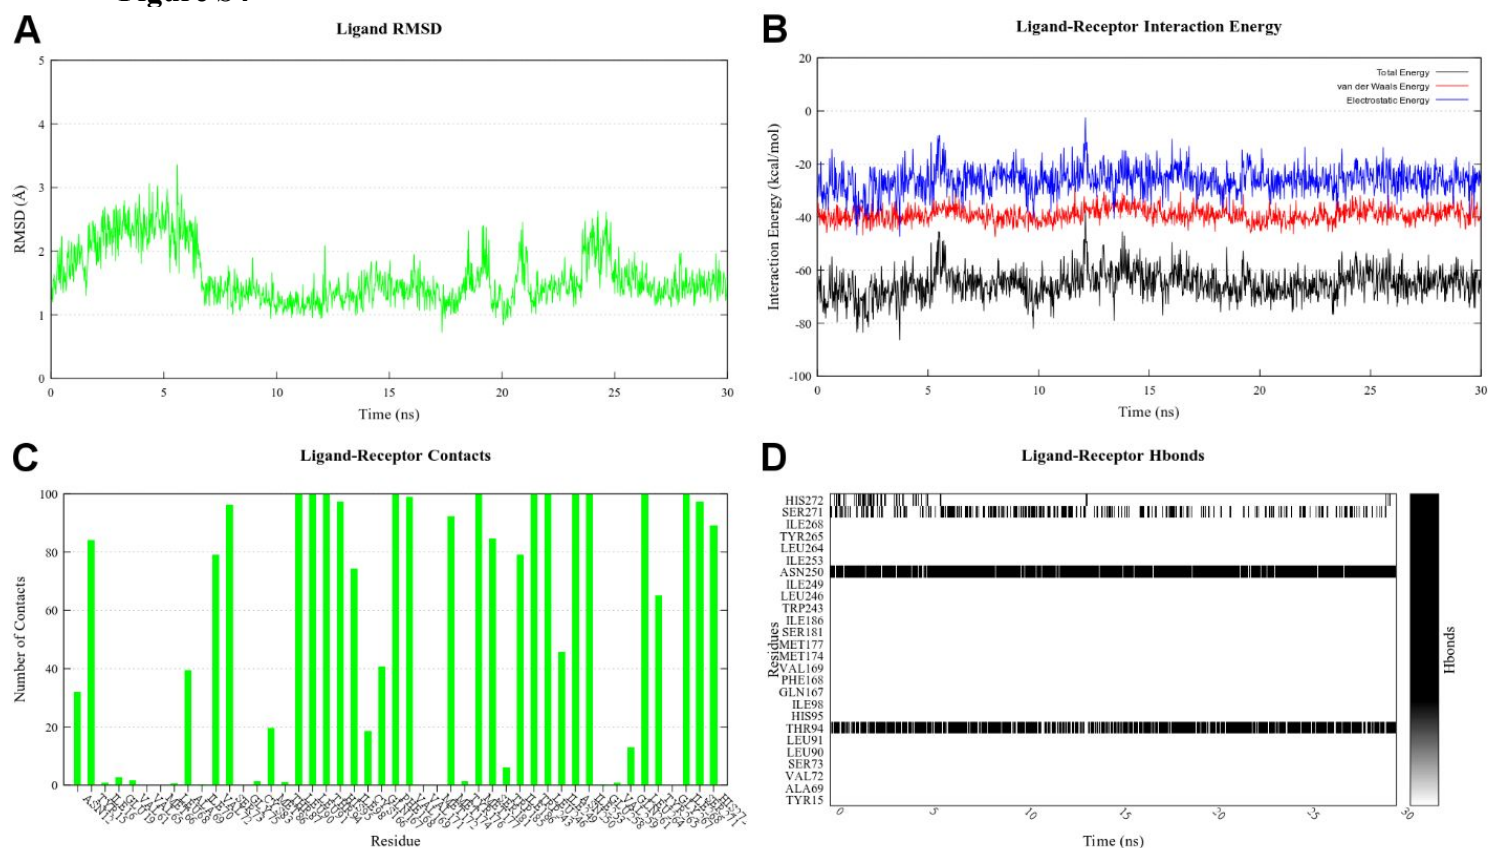

**Figure S4.** Analysis of the MD simulation (replicate 2) of the complex between compound **8** and hA<sub>3</sub>AR. The replicate was chosen on the basis of the lowest average total interaction energy. **A)** RMSD of ligand heavy atoms relative to the docking pose, after alignment of the protein C $\alpha$  atoms to the starting structure. **B)** Electrostatic and van der Waals (and Total, as sum of the two) ligand-receptor interaction energy. **C)** Histograms showing the percentage of time where each protein residue is in contact (distance < 4 Å) with the ligand. Residues with 0 contacts during the simulations are not reported. **D)** Presence of hydrogen bonds during the simulation for selected residues (residues that are in contact with the ligand at least for one third of the simulation).

Figure S5

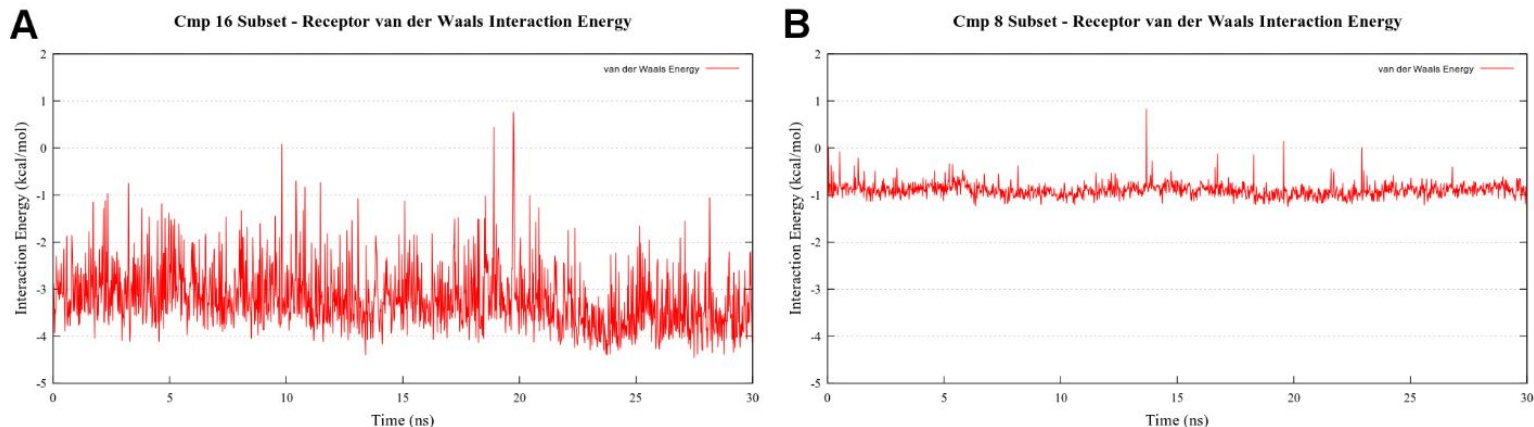

**Figure S5.** van der Waals interaction energy during the MD simulation between **A)** the receptor and the carbon and hydrogen atoms replacing O4' in compound **16**; **B)** the receptor and O4' of compound **8**.

Figure S6

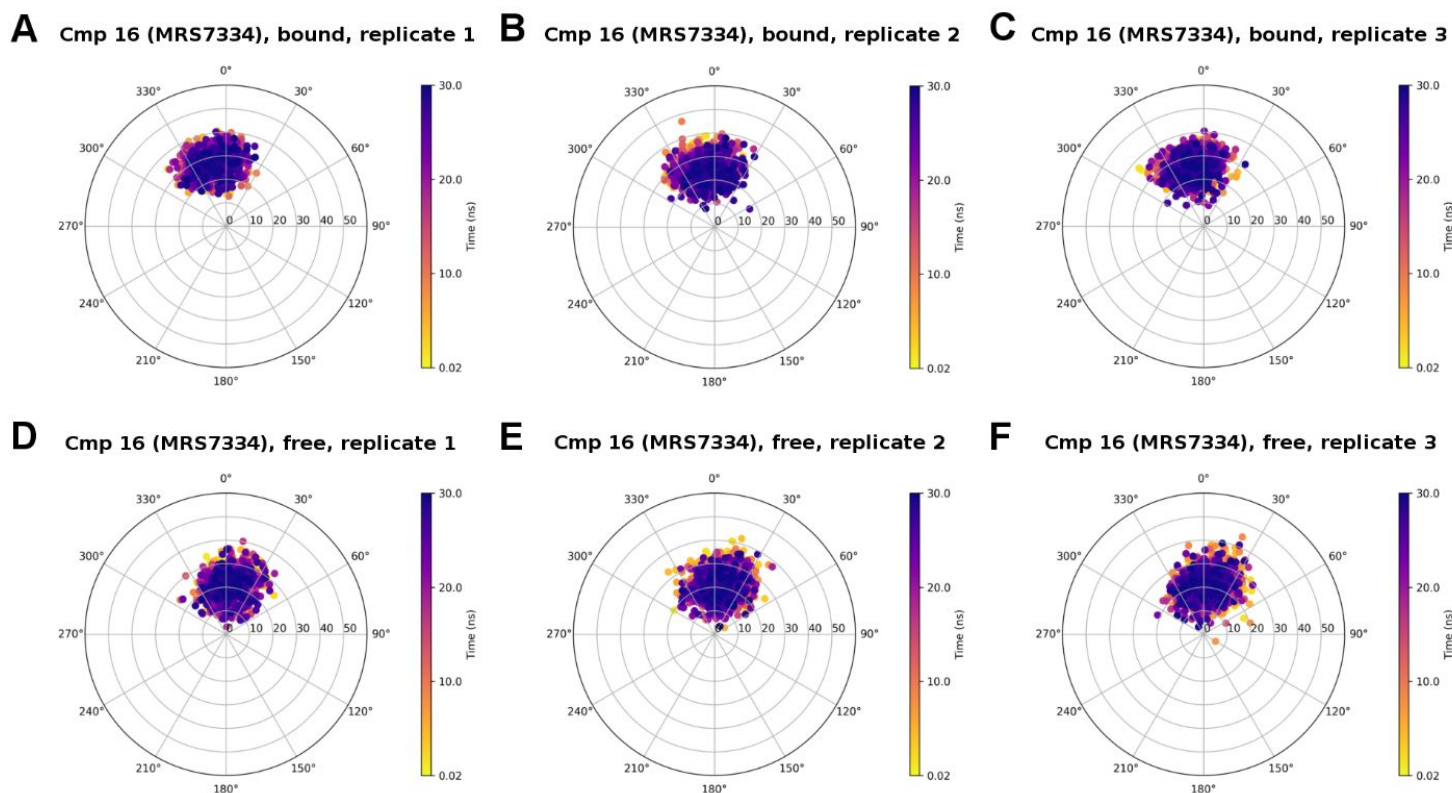

**Figure S6.** Conformation of the (N)-methanocarba moiety of compound **16** expressed as phase angle of pseudorotation ( $P$ ) and degree of deformation from the plane ( $v_{max}$ ), reported respectively on the polar axis and on the  $x/y$  axes of the pseudorotational cycle. The time-coordinate is

represented by a colorimetric scale going from yellow to dark purple. Plots **A-B-C**) represent the puckering of the (N)-methanocarba when the compound is bound to the receptor, in replicates 1, 2 and 3, respectively. Plots **D-E-F**) represent the puckering of the (N)-methanocarba when the compound is simulated in an un-bound state, in solution, in three different replicates.

**Figure S7**

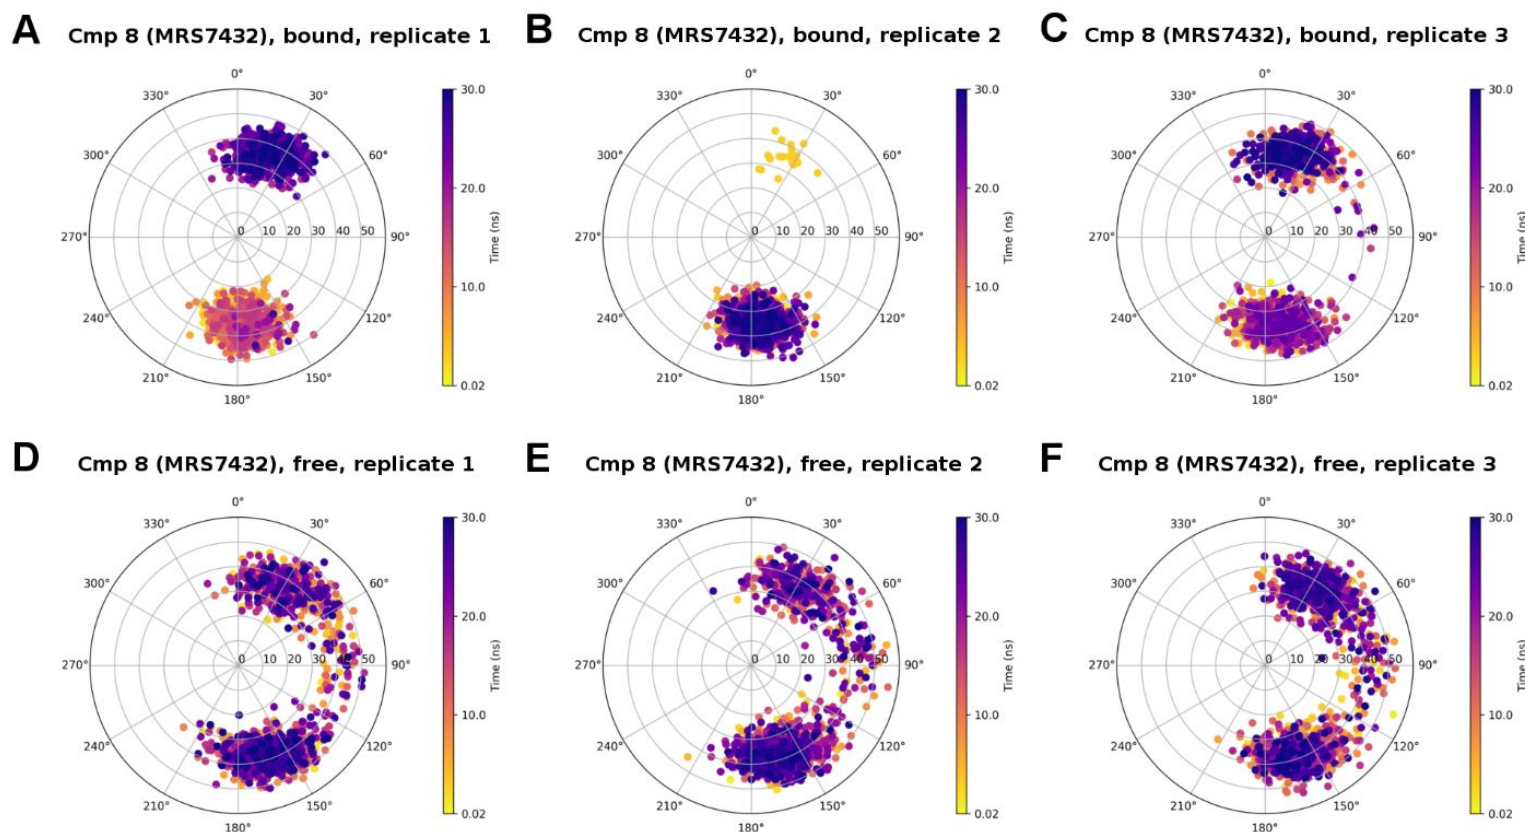

**Figure S7.** Conformation of the ribose-like ring of compound **8** expressed as phase angle of pseudorotation ( $P$ ) and degree of deformation from the plane ( $v_{max}$ ), reported respectively on the polar axis and on the  $x/y$  axes of the pseudorotational cycle. The time-coordinate is represented by a colorimetric scale going from yellow to dark purple. Plots **A-B-C**) represent the puckering of ribose-like ring when the compound is bound to the receptor, in replicates 1, 2 and 3, respectively. Plots **D-E-F**) represent the puckering of the ribose-like ring when the compound is simulated in an un-bound state, in solution, in three different replicates.

**Video S1.** MD trajectory (replicate 1) of the complex between compound **16 (MRS7334)** and hA<sub>3</sub>AR, after superposition of receptor C $\alpha$  atoms to the initial frame. The receptor is depicted by a grey ribbon and the ligand by green sticks. The transparency of TM7 tip was increased to enable the visualization of the ligand. Key receptor residues are highlighted by sticks. Hydrogen bonds are shown by dashed lines.

**Video S2.** MD trajectory (replicate 2) of the complex between compound **8 (MRS7432)** and hA<sub>3</sub>AR, after superposition of receptor C $\alpha$  atoms to the initial frame. The receptor is depicted by a grey ribbon and the ligand by orange sticks. The transparency of TM7 tip was increased to enable the visualization of the ligand. Key receptor residues are highlighted by sticks. Hydrogen bonds are shown by dashed lines.



**Table S4.** Screening of compound **4** (MRS5980) by DiscoverX (Eurofins DiscoverX Corporation, Fremont, CA 94538 USA) broadly at G protein-coupled receptors (GPCRs) and at kinases.

A. Compound **4** (10  $\mu$ M) tested as agonist in GPCRMax screen (167 known GPCRs). ADORA3 (A<sub>3</sub>AR) is the only hit.

| GPCR ID      | Customer | Compound ID | Assay Mode | Conc [ $\mu$ M] | Mean RLU | % Activity |
|--------------|----------|-------------|------------|-----------------|----------|------------|
| ADCYAP1R1    | NIH      | MRS5980     | Agonist    | 10              | 222880   | 0%         |
| ADORA3       | NIH      | MRS5980     | Agonist    | 10              | 592620   | 168%       |
| ADRA1B       | NIH      | MRS5980     | Agonist    | 10              | 210280   | 0%         |
| ADRA2A       | NIH      | MRS5980     | Agonist    | 10              | 441000   | 0%         |
| ADRA2B       | NIH      | MRS5980     | Agonist    | 10              | 268660   | 4%         |
| ADRA2C       | NIH      | MRS5980     | Agonist    | 10              | 133560   | -1%        |
| ADRB1        | NIH      | MRS5980     | Agonist    | 10              | 211260   | 1%         |
| ADRB2        | NIH      | MRS5980     | Agonist    | 10              | 49940    | 0%         |
| AGTR1        | NIH      | MRS5980     | Agonist    | 10              | 495720   | -3%        |
| AGTRL1       | NIH      | MRS5980     | Agonist    | 10              | 401660   | 0%         |
| AVPR1A       | NIH      | MRS5980     | Agonist    | 10              | 22260    | 0%         |
| AVPR1B       | NIH      | MRS5980     | Agonist    | 10              | 33140    | 0%         |
| AVPR2        | NIH      | MRS5980     | Agonist    | 10              | 796320   | 1%         |
| BDKR1        | NIH      | MRS5980     | Agonist    | 10              | 25480    | 0%         |
| BDKR2        | NIH      | MRS5980     | Agonist    | 10              | 530740   | -2%        |
| BRG3         | NIH      | MRS5980     | Agonist    | 10              | 364280   | 4%         |
| C3AR1        | NIH      | MRS5980     | Agonist    | 10              | 41020    | 0%         |
| C3AR1        | NIH      | MRS5980     | Agonist    | 10              | 136080   | 1%         |
| C3L2         | NIH      | MRS5980     | Agonist    | 10              | 447020   | 3%         |
| CACR1        | NIH      | MRS5980     | Agonist    | 10              | 33040    | 0%         |
| CALCRL-RAMP1 | NIH      | MRS5980     | Agonist    | 10              | 82680    | 0%         |
| CALCRL-RAMP2 | NIH      | MRS5980     | Agonist    | 10              | 209720   | 4%         |
| CALCRL-RAMP3 | NIH      | MRS5980     | Agonist    | 10              | 450240   | 2%         |
| CALCR-RAMP2  | NIH      | MRS5980     | Agonist    | 10              | 167020   | 8%         |
| CALCR-RAMP3  | NIH      | MRS5980     | Agonist    | 10              | 14000    | -1%        |
| CCKAR        | NIH      | MRS5980     | Agonist    | 10              | 43260    | 0%         |
| CCKBR        | NIH      | MRS5980     | Agonist    | 10              | 933960   | 3%         |
| CCR10        | NIH      | MRS5980     | Agonist    | 10              | 97580    | 1%         |
| CCR1         | NIH      | MRS5980     | Agonist    | 10              | 736960   | 10%        |
| CCR2         | NIH      | MRS5980     | Agonist    | 10              | 150640   | 2%         |
| CCR3         | NIH      | MRS5980     | Agonist    | 10              | 123620   | 7%         |
| CCR4         | NIH      | MRS5980     | Agonist    | 10              | 287280   | 6%         |
| CCR5         | NIH      | MRS5980     | Agonist    | 10              | 207760   | 3%         |
| CCR6         | NIH      | MRS5980     | Agonist    | 10              | 196280   | 3%         |
| CCR7         | NIH      | MRS5980     | Agonist    | 10              | 1327620  | 11%        |
| CCR8         | NIH      | MRS5980     | Agonist    | 10              | 35140    | 0%         |
| CCR9         | NIH      | MRS5980     | Agonist    | 10              | 121800   | 0%         |
| CHRM1        | NIH      | MRS5980     | Agonist    | 10              | 846160   | 2%         |
| CHRM2        | NIH      | MRS5980     | Agonist    | 10              | 63260    | 0%         |
| CHRM3        | NIH      | MRS5980     | Agonist    | 10              | 69860    | 0%         |
| CHRM4        | NIH      | MRS5980     | Agonist    | 10              | 586040   | -1%        |
| CHRM5        | NIH      | MRS5980     | Agonist    | 10              | 552440   | -2%        |
| CNLR1        | NIH      | MRS5980     | Agonist    | 10              | 89460    | 1%         |
| CNR1         | NIH      | MRS5980     | Agonist    | 10              | 26320    | 1%         |
| CNR2         | NIH      | MRS5980     | Agonist    | 10              | 153260   | -15%       |
| CNHR1        | NIH      | MRS5980     | Agonist    | 10              | 291900   | 1%         |
| CNHR2        | NIH      | MRS5980     | Agonist    | 10              | 120960   | 0%         |
| CNHR3        | NIH      | MRS5980     | Agonist    | 10              | 151060   | -2%        |
| CX3CR1       | NIH      | MRS5980     | Agonist    | 10              | 366800   | 1%         |
| CXCR1        | NIH      | MRS5980     | Agonist    | 10              | 250460   | 1%         |
| CXCR2        | NIH      | MRS5980     | Agonist    | 10              | 220200   | 4%         |
| CXCR3        | NIH      | MRS5980     | Agonist    | 10              | 424900   | 1%         |
| CXCR4        | NIH      | MRS5980     | Agonist    | 10              | 82280    | 12%        |
| CXCR5        | NIH      | MRS5980     | Agonist    | 10              | 263900   | 1%         |
| CXCR6        | NIH      | MRS5980     | Agonist    | 10              | 29260    | 3%         |
| CXCR7        | NIH      | MRS5980     | Agonist    | 10              | 324660   | 2%         |
| DRO1         | NIH      | MRS5980     | Agonist    | 10              | 110740   | 1%         |
| DRO2L        | NIH      | MRS5980     | Agonist    | 10              | 98140    | 4%         |
| DRO2S        | NIH      | MRS5980     | Agonist    | 10              | 233880   | 3%         |
| DRO3         | NIH      | MRS5980     | Agonist    | 10              | 581000   | 12%        |
| DRO4         | NIH      | MRS5980     | Agonist    | 10              | 12880    | 3%         |
| DRO5         | NIH      | MRS5980     | Agonist    | 10              | 31360    | 2%         |
| EDG1         | NIH      | MRS5980     | Agonist    | 10              | 145180   | -2%        |
| EDG2         | NIH      | MRS5980     | Agonist    | 10              | 174720   | -1%        |
| EDG3         | NIH      | MRS5980     | Agonist    | 10              | 1139460  | 12%        |
| EDG4         | NIH      | MRS5980     | Agonist    | 10              | 146020   | 1%         |
| EDG5         | NIH      | MRS5980     | Agonist    | 10              | 253260   | 2%         |
| EDG6         | NIH      | MRS5980     | Agonist    | 10              | 423640   | -9%        |
| EDG7         | NIH      | MRS5980     | Agonist    | 10              | 87780    | 0%         |
| EDNRA        | NIH      | MRS5980     | Agonist    | 10              | 25340    | 0%         |
| EDNRB        | NIH      | MRS5980     | Agonist    | 10              | 96280    | 2%         |
| F2R          | NIH      | MRS5980     | Agonist    | 10              | 153020   | 1%         |
| F2RL1        | NIH      | MRS5980     | Agonist    | 10              | 493040   | 2%         |
| F2RL3        | NIH      | MRS5980     | Agonist    | 10              | 1126720  | 15%        |
| FFAR1        | NIH      | MRS5980     | Agonist    | 10              | 211120   | 2%         |
| FFRL1        | NIH      | MRS5980     | Agonist    | 10              | 1510660  | 12%        |
| FSHR         | NIH      | MRS5980     | Agonist    | 10              | 98140    | 1%         |
| FSHR         | NIH      | MRS5980     | Agonist    | 10              | 211120   | -5%        |
| GALR1        | NIH      | MRS5980     | Agonist    | 10              | 366520   | 3%         |
| GALR2        | NIH      | MRS5980     | Agonist    | 10              | 682360   | 7%         |
| GCCR         | NIH      | MRS5980     | Agonist    | 10              | 277760   | 1%         |
| GHGR         | NIH      | MRS5980     | Agonist    | 10              | 448000   | 5%         |
| GPR          | NIH      | MRS5980     | Agonist    | 10              | 14420    | 0%         |
| GLP1R        | NIH      | MRS5980     | Agonist    | 10              | 194040   | 1%         |

| GPCR ID  | Customer | Compound ID | Assay Mode | Conc [ $\mu$ M] | Mean RLU | % Activity |
|----------|----------|-------------|------------|-----------------|----------|------------|
| GLP2R    | NIH      | MRS5980     | Agonist    | 10              | 92540    | 2%         |
| GR1      | NIH      | MRS5980     | Agonist    | 10              | 79660    | 2%         |
| GR103    | NIH      | MRS5980     | Agonist    | 10              | 77560    | 5%         |
| GR108A   | NIH      | MRS5980     | Agonist    | 10              | 538440   | 3%         |
| GR108B   | NIH      | MRS5980     | Agonist    | 10              | 303860   | -1%        |
| GR119    | NIH      | MRS5980     | Agonist    | 10              | 213060   | 2%         |
| GR120    | NIH      | MRS5980     | Agonist    | 10              | 31640    | 4%         |
| GR33     | NIH      | MRS5980     | Agonist    | 10              | 396480   | 9%         |
| GPR2     | NIH      | MRS5980     | Agonist    | 10              | 281960   | 8%         |
| GPR4     | NIH      | MRS5980     | Agonist    | 10              | 52640    | 0%         |
| HCRTR1   | NIH      | MRS5980     | Agonist    | 10              | 108220   | 0%         |
| HCRTR2   | NIH      | MRS5980     | Agonist    | 10              | 61740    | 0%         |
| HRH1     | NIH      | MRS5980     | Agonist    | 10              | 375900   | 0%         |
| HRH2     | NIH      | MRS5980     | Agonist    | 10              | 94820    | 3%         |
| HRH3     | NIH      | MRS5980     | Agonist    | 10              | 40320    | -1%        |
| HRH4     | NIH      | MRS5980     | Agonist    | 10              | 1021580  | 13%        |
| HTR1A    | NIH      | MRS5980     | Agonist    | 10              | 1305500  | 2%         |
| HTR1B    | NIH      | MRS5980     | Agonist    | 10              | 1135260  | 4%         |
| HTR1E    | NIH      | MRS5980     | Agonist    | 10              | 32900    | 0%         |
| HTR1F    | NIH      | MRS5980     | Agonist    | 10              | 330530   | -4%        |
| HTR2A    | NIH      | MRS5980     | Agonist    | 10              | 440580   | 2%         |
| HTR2C    | NIH      | MRS5980     | Agonist    | 10              | 437240   | 0%         |
| HTR3A    | NIH      | MRS5980     | Agonist    | 10              | 1173200  | 2%         |
| KISS1R   | NIH      | MRS5980     | Agonist    | 10              | 49700    | 3%         |
| UCGR     | NIH      | MRS5980     | Agonist    | 10              | 27300    | 1%         |
| LTBR     | NIH      | MRS5980     | Agonist    | 10              | 127400   | 0%         |
| MCL1     | NIH      | MRS5980     | Agonist    | 10              | 11900    | 0%         |
| MC3R     | NIH      | MRS5980     | Agonist    | 10              | 15120    | -1%        |
| MC4R     | NIH      | MRS5980     | Agonist    | 10              | 32060    | -1%        |
| MC5R     | NIH      | MRS5980     | Agonist    | 10              | 114100   | -2%        |
| MCHR1    | NIH      | MRS5980     | Agonist    | 10              | 40740    | 6%         |
| MCHR2    | NIH      | MRS5980     | Agonist    | 10              | 43400    | -1%        |
| MLNR     | NIH      | MRS5980     | Agonist    | 10              | 232680   | 0%         |
| MRSXPRL1 | NIH      | MRS5980     | Agonist    | 10              | 634340   | -4%        |
| MRSXPRL2 | NIH      | MRS5980     | Agonist    | 10              | 129220   | -1%        |
| MTNRL1A  | NIH      | MRS5980     | Agonist    | 10              | 61180    | 8%         |
| NMBR     | NIH      | MRS5980     | Agonist    | 10              | 60200    | -1%        |
| NMU1R    | NIH      | MRS5980     | Agonist    | 10              | 94640    | NIH        |
| NFBWR1   | NIH      | MRS5980     | Agonist    | 10              | 62440    | 2%         |
| NFBWR2   | NIH      | MRS5980     | Agonist    | 10              | 184180   | NIH        |
| NFFR1    | NIH      | MRS5980     | Agonist    | 10              | 149240   | 5%         |
| NPSR1B   | NIH      | MRS5980     | Agonist    | 10              | 56420    | 0%         |
| NPY1R    | NIH      | MRS5980     | Agonist    | 10              | 56280    | -3%        |
| NPY2R    | NIH      | MRS5980     | Agonist    | 10              | 311920   | 1%         |
| NTSR1    | NIH      | MRS5980     | Agonist    | 10              | 353640   | 3%         |
| OPR1     | NIH      | MRS5980     | Agonist    | 10              | 108360   | 0%         |
| OPR1L    | NIH      | MRS5980     | Agonist    | 10              | 45220    | 0%         |
| OPR1L    | NIH      | MRS5980     | Agonist    | 10              | 167860   | 0%         |
| OPRM1    | NIH      | MRS5980     | Agonist    | 10              | 95340    | 0%         |
| QIR1     | NIH      | MRS5980     | Agonist    | 10              | 74480    | 1%         |
| QIR2     | NIH      | MRS5980     | Agonist    | 10              | 24920    | 1%         |
| P2RY1    | NIH      | MRS5980     | Agonist    | 10              | 88200    | 0%         |
| P2RY11   | NIH      | MRS5980     | Agonist    | 10              | 54040    | 2%         |
| P2RY12   | NIH      | MRS5980     | Agonist    | 10              | 438620   | 5%         |
| P2RY2    | NIH      | MRS5980     | Agonist    | 10              | 281680   | 0%         |
| P2RY4    | NIH      | MRS5980     | Agonist    | 10              | 421680   | 9%         |
| P2RY6    | NIH      | MRS5980     | Agonist    | 10              | 317800   | 5%         |
| PPYR1    | NIH      | MRS5980     | Agonist    | 10              | 35140    | 1%         |
| PRU4R    | NIH      | MRS5980     | Agonist    | 10              | 34440    | 2%         |
| PROKR1   | NIH      | MRS5980     | Agonist    | 10              | 30800    | 0%         |
| PROKR2   | NIH      | MRS5980     | Agonist    | 10              | 10780    | 1%         |
| PTAFR    | NIH      | MRS5980     | Agonist    | 10              | 665280   | -3%        |
| PTGER2   | NIH      | MRS5980     | Agonist    | 10              | 22400    | 0%         |
| PTGER3   | NIH      | MRS5980     | Agonist    | 10              | 281120   | 3%         |
| PTGER4   | NIH      | MRS5980     | Agonist    | 10              | 89880    | 2%         |
| PTGFR    | NIH      | MRS5980     | Agonist    | 10              | 8400     | 0%         |
| PTGIR    | NIH      | MRS5980     | Agonist    | 10              | 141680   | 1%         |
| PTH1R    | NIH      | MRS5980     | Agonist    | 10              | 100800   | 3%         |
| PTH2R    | NIH      | MRS5980     | Agonist    | 10              | 106120   | 1%         |
| ROXFP3   | NIH      | MRS5980     | Agonist    | 10              | 56280    | 8%         |
| SCTR     | NIH      | MRS5980     | Agonist    | 10              | 389200   | 2%         |
| SSTR1    | NIH      | MRS5980     | Agonist    | 10              | 30520    | 6%         |
| SSTR2    | NIH      | MRS5980     | Agonist    | 10              | 8400     | 0%         |
| SSTR3    | NIH      | MRS5980     | Agonist    | 10              | 55160    | NIH        |
| SSTR5    | NIH      | MRS5980     | Agonist    | 10              | 196140   | 1%         |
| TACR1    | NIH      | MRS5980     | Agonist    | 10              | 423240   | -1%        |
| TACR2    | NIH      | MRS5980     | Agonist    | 10              | 419160   | 2%         |
| TACR3    | NIH      | MRS5980     | Agonist    | 10              | 111300   | 0%         |
| TBXA2R   | NIH      | MRS5980     | Agonist    | 10              | 132860   | 1%         |
| THRR     | NIH      | MRS5980     | Agonist    | 10              | 16520    | 1%         |
| TSHR[L]  | NIH      | MRS5980     | Agonist    | 10              | 4620     | -3%        |
| UTR2     | NIH      | MRS5980     | Agonist    | 10              | 34160    | 4%         |
| VIPR1    | NIH      | MRS5980     | Agonist    | 10              | 421680   | 0%         |
| VIPR2    | NIH      | MRS5980     | Agonist    | 10              | 307720   | 0%         |

B. Compound 4 (10  $\mu$ M) tested as antagonist in GPCRMax screen (167 known GPCRs). No antagonist hits were found.

| GPCR ID     | Customer | Compound ID | Assay Mode | Conc ( $\mu$ M) | Mean RLU | % Inhibition |
|-------------|----------|-------------|------------|-----------------|----------|--------------|
| ADCYAP1R1   | NIH      | MRS2980     | Antagonist | 10              | 1226700  | 21%          |
| ADORA3      | NIH      | MRS2980     | Antagonist | 10              | 359300   | -11%         |
| ADORA1B     | NIH      | MRS2980     | Antagonist | 10              | 1276320  | -3%          |
| ADORA2A     | NIH      | MRS2980     | Antagonist | 10              | 1091160  | 1%           |
| ADORA2B     | NIH      | MRS2980     | Antagonist | 10              | 618940   | -9%          |
| ADORA2C     | NIH      | MRS2980     | Antagonist | 10              | 659120   | 13%          |
| ADRB1       | NIH      | MRS2980     | Antagonist | 10              | 904400   | -6%          |
| ADRB2       | NIH      | MRS2980     | Antagonist | 10              | 760200   | -1%          |
| AGTRL1      | NIH      | MRS2980     | Antagonist | 10              | 2631720  | 1%           |
| AGTRL1      | NIH      | MRS2980     | Antagonist | 10              | 2088240  | -2%          |
| AVPR1A      | NIH      | MRS2980     | Antagonist | 10              | 343560   | 9%           |
| AVPR1B      | NIH      | MRS2980     | Antagonist | 10              | 238840   | 7%           |
| AVPR2       | NIH      | MRS2980     | Antagonist | 10              | 2917880  | 3%           |
| BOKR81      | NIH      | MRS2980     | Antagonist | 10              | 121380   | -6%          |
| BOKR82      | NIH      | MRS2980     | Antagonist | 10              | 2809040  | 20%          |
| BR33        | NIH      | MRS2980     | Antagonist | 10              | 2652860  | -11%         |
| C3AR1       | NIH      | MRS2980     | Antagonist | 10              | 1875440  | 8%           |
| C3AR1       | NIH      | MRS2980     | Antagonist | 10              | 1472320  | -6%          |
| CSL2        | NIH      | MRS2980     | Antagonist | 10              | 814380   | -17%         |
| CALCR       | NIH      | MRS2980     | Antagonist | 10              | 281120   | -1%          |
| CALCR-RAMP1 | NIH      | MRS2980     | Antagonist | 10              | 980000   | 12%          |
| CALCR-RAMP2 | NIH      | MRS2980     | Antagonist | 10              | 1064000  | -7%          |
| CALCR-RAMP3 | NIH      | MRS2980     | Antagonist | 10              | 1605800  | 11%          |
| CALCR-RAMP2 | NIH      | MRS2980     | Antagonist | 10              | 791560   | -11%         |
| CALCR-RAMP3 | NIH      | MRS2980     | Antagonist | 10              | 32480    | -27%         |
| CCAR        | NIH      | MRS2980     | Antagonist | 10              | 1056300  | 3%           |
| CCAR        | NIH      | MRS2980     | Antagonist | 10              | 2899280  | 12%          |
| CCR10       | NIH      | MRS2980     | Antagonist | 10              | 876960   | -6%          |
| CCR1        | NIH      | MRS2980     | Antagonist | 10              | 1194200  | 1%           |
| CCR2        | NIH      | MRS2980     | Antagonist | 10              | 833660   | -7%          |
| CCR3        | NIH      | MRS2980     | Antagonist | 10              | 309120   | -1%          |
| CCR4        | NIH      | MRS2980     | Antagonist | 10              | 1425140  | 1%           |
| CCR5        | NIH      | MRS2980     | Antagonist | 10              | 1087240  | 6%           |
| CCR6        | NIH      | MRS2980     | Antagonist | 10              | 1416240  | 0%           |
| CCR7        | NIH      | MRS2980     | Antagonist | 10              | 3297140  | 5%           |
| CCR8        | NIH      | MRS2980     | Antagonist | 10              | 612080   | 7%           |
| CCR9        | NIH      | MRS2980     | Antagonist | 10              | 825340   | -2%          |
| CHRM1       | NIH      | MRS2980     | Antagonist | 10              | 2259320  | 23%          |
| CHRM2       | NIH      | MRS2980     | Antagonist | 10              | 687820   | 17%          |
| CHRM3       | NIH      | MRS2980     | Antagonist | 10              | 500220   | 19%          |
| CHRM4       | NIH      | MRS2980     | Antagonist | 10              | 992600   | 5%           |
| CHRM5       | NIH      | MRS2980     | Antagonist | 10              | 2348860  | 13%          |
| CMRL1       | NIH      | MRS2980     | Antagonist | 10              | 2542820  | -3%          |
| CNR1        | NIH      | MRS2980     | Antagonist | 10              | 208080   | 1%           |
| CNR2        | NIH      | MRS2980     | Antagonist | 10              | 468440   | 1%           |
| CNR1        | NIH      | MRS2980     | Antagonist | 10              | 3194160  | 14%          |
| CNR2        | NIH      | MRS2980     | Antagonist | 10              | 2728460  | 8%           |
| CNR2        | NIH      | MRS2980     | Antagonist | 10              | 794920   | 4%           |
| OCGR1       | NIH      | MRS2980     | Antagonist | 10              | 3324440  | -6%          |
| OCGR1       | NIH      | MRS2980     | Antagonist | 10              | 2163700  | 5%           |
| OCGR2       | NIH      | MRS2980     | Antagonist | 10              | 903700   | 9%           |
| OCGR3       | NIH      | MRS2980     | Antagonist | 10              | 1182160  | 0%           |
| OCGR4       | NIH      | MRS2980     | Antagonist | 10              | 131040   | 5%           |
| OCGR5       | NIH      | MRS2980     | Antagonist | 10              | 1065540  | 1%           |
| OCGR6       | NIH      | MRS2980     | Antagonist | 10              | 116750   | 12%          |
| OCGR7       | NIH      | MRS2980     | Antagonist | 10              | 1840180  | 13%          |
| DRD1        | NIH      | MRS2980     | Antagonist | 10              | 873460   | -3%          |
| DRD2        | NIH      | MRS2980     | Antagonist | 10              | 385940   | -9%          |
| DRD2S       | NIH      | MRS2980     | Antagonist | 10              | 1482880  | -16%         |
| DRD3        | NIH      | MRS2980     | Antagonist | 10              | 1023220  | -3%          |
| DRD4        | NIH      | MRS2980     | Antagonist | 10              | 44020    | -0%          |
| DRD5        | NIH      | MRS2980     | Antagonist | 10              | 366940   | 2%           |
| EB12        | NIH      | MRS2980     | Antagonist | 10              | 1672380  | 16%          |
| EDG1        | NIH      | MRS2980     | Antagonist | 10              | 832840   | 21%          |
| EDG3        | NIH      | MRS2980     | Antagonist | 10              | 4259500  | -23%         |
| EDG4        | NIH      | MRS2980     | Antagonist | 10              | 360640   | 2%           |
| EDG5        | NIH      | MRS2980     | Antagonist | 10              | 1712900  | 11%          |
| EDG6        | NIH      | MRS2980     | Antagonist | 10              | 786800   | -6%          |
| EDG7        | NIH      | MRS2980     | Antagonist | 10              | 680960   | 13%          |
| EDNRA       | NIH      | MRS2980     | Antagonist | 10              | 424760   | -6%          |
| EDNRB       | NIH      | MRS2980     | Antagonist | 10              | 1435940  | -4%          |
| F2R         | NIH      | MRS2980     | Antagonist | 10              | 1251600  | -7%          |
| F2RL1       | NIH      | MRS2980     | Antagonist | 10              | 2717680  | 0%           |
| F2RL3       | NIH      | MRS2980     | Antagonist | 10              | 2605540  | -6%          |
| FFAR1       | NIH      | MRS2980     | Antagonist | 10              | 420420   | 21%          |
| FFAR1       | NIH      | MRS2980     | Antagonist | 10              | 3265920  | -8%          |
| FFRL1       | NIH      | MRS2980     | Antagonist | 10              | 2497880  | 1%           |
| FSHR        | NIH      | MRS2980     | Antagonist | 10              | 533700   | -11%         |
| GALR1       | NIH      | MRS2980     | Antagonist | 10              | 2150820  | 2%           |
| GALR2       | NIH      | MRS2980     | Antagonist | 10              | 1271620  | 13%          |
| GCCR        | NIH      | MRS2980     | Antagonist | 10              | 2070180  | 8%           |
| GHSR        | NIH      | MRS2980     | Antagonist | 10              | 1460900  | -4%          |
| GPR         | NIH      | MRS2980     | Antagonist | 10              | 77980    | -8%          |
| GLP1R       | NIH      | MRS2980     | Antagonist | 10              | 2057720  | -6%          |

| GPCR ID | Customer | Compound ID | Assay Mode | Conc ( $\mu$ M) | Mean RLU | % Inhibition |
|---------|----------|-------------|------------|-----------------|----------|--------------|
| GLP2R   | NIH      | MRS2980     | Antagonist | 10              | 728840   | -7%          |
| GPR1    | NIH      | MRS2980     | Antagonist | 10              | 872380   | -2%          |
| GPR103  | NIH      | MRS2980     | Antagonist | 10              | 148120   | 1%           |
| GPR108A | NIH      | MRS2980     | Antagonist | 10              | 1302700  | 5%           |
| GPR108B | NIH      | MRS2980     | Antagonist | 10              | 2364040  | -7%          |
| GPR119  | NIH      | MRS2980     | Antagonist | 10              | 311780   | 9%           |
| GPR120  | NIH      | MRS2980     | Antagonist | 10              | 115940   | 20%          |
| GPR33   | NIH      | MRS2980     | Antagonist | 10              | 1074360  | -7%          |
| GPR92   | NIH      | MRS2980     | Antagonist | 10              | 745220   | 26%          |
| GRPR    | NIH      | MRS2980     | Antagonist | 10              | 1145900  | 2%           |
| HCR1L   | NIH      | MRS2980     | Antagonist | 10              | 3115420  | 2%           |
| HCR2L   | NIH      | MRS2980     | Antagonist | 10              | 2979620  | 5%           |
| HRH1    | NIH      | MRS2980     | Antagonist | 10              | 1859200  | -3%          |
| HRH2    | NIH      | MRS2980     | Antagonist | 10              | 295260   | 14%          |
| HRH3    | NIH      | MRS2980     | Antagonist | 10              | 299040   | -11%         |
| HRH4    | NIH      | MRS2980     | Antagonist | 10              | 2085460  | 3%           |
| HTRLA   | NIH      | MRS2980     | Antagonist | 10              | 2051280  | 27%          |
| HTRLB   | NIH      | MRS2980     | Antagonist | 10              | 2161600  | 9%           |
| HTRLC   | NIH      | MRS2980     | Antagonist | 10              | 61320    | 12%          |
| HTRLD   | NIH      | MRS2980     | Antagonist | 10              | 725340   | 16%          |
| HTRE2A  | NIH      | MRS2980     | Antagonist | 10              | 1747080  | 17%          |
| HTRE2C  | NIH      | MRS2980     | Antagonist | 10              | 1965040  | 11%          |
| HTRE3A  | NIH      | MRS2980     | Antagonist | 10              | 3366160  | 11%          |
| HS1R    | NIH      | MRS2980     | Antagonist | 10              | 222460   | -3%          |
| LMCR    | NIH      | MRS2980     | Antagonist | 10              | 157920   | -1%          |
| LTBR    | NIH      | MRS2980     | Antagonist | 10              | 1601480  | 0%           |
| MCLR    | NIH      | MRS2980     | Antagonist | 10              | 41720    | -6%          |
| MCR     | NIH      | MRS2980     | Antagonist | 10              | 83000    | 15%          |
| MCR     | NIH      | MRS2980     | Antagonist | 10              | 191380   | -1%          |
| MCR     | NIH      | MRS2980     | Antagonist | 10              | 356020   | 0%           |
| MCR1    | NIH      | MRS2980     | Antagonist | 10              | 136000   | -7%          |
| MCR2    | NIH      | MRS2980     | Antagonist | 10              | 268940   | 22%          |
| MLAR    | NIH      | MRS2980     | Antagonist | 10              | 2167620  | -1%          |
| MRSR1   | NIH      | MRS2980     | Antagonist | 10              | 2476880  | 6%           |
| MRSR2   | NIH      | MRS2980     | Antagonist | 10              | 741020   | 5%           |
| MTNR1A  | NIH      | MRS2980     | Antagonist | 10              | 159300   | -16%         |
| MTNR1B  | NIH      | MRS2980     | Antagonist | 10              | 757820   | 9%           |
| MTNR1L  | NIH      | MRS2980     | Antagonist | 10              | 1184540  | 3%           |
| NPBR1   | NIH      | MRS2980     | Antagonist | 10              | 167880   | 10%          |
| NPBR2   | NIH      | MRS2980     | Antagonist | 10              | 1376900  | -4%          |
| NPRL1   | NIH      | MRS2980     | Antagonist | 10              | 386260   | -6%          |
| NPRL2   | NIH      | MRS2980     | Antagonist | 10              | 428400   | 3%           |
| NPY1R   | NIH      | MRS2980     | Antagonist | 10              | 582820   | 12%          |
| NPY2R   | NIH      | MRS2980     | Antagonist | 10              | 2774940  | -2%          |
| NTSR1   | NIH      | MRS2980     | Antagonist | 10              | 1710380  | -1%          |
| OPR1    | NIH      | MRS2980     | Antagonist | 10              | 582680   | 7%           |
| OPR1    | NIH      | MRS2980     | Antagonist | 10              | 227220   | -10%         |
| OPR1    | NIH      | MRS2980     | Antagonist | 10              | 885360   | 26%          |
| OPR1    | NIH      | MRS2980     | Antagonist | 10              | 2581880  | 0%           |
| OXER1   | NIH      | MRS2980     | Antagonist | 10              | 222180   | -13%         |
| OXTR    | NIH      | MRS2980     | Antagonist | 10              | 451640   | -5%          |
| P2RY1   | NIH      | MRS2980     | Antagonist | 10              | 322980   | 6%           |
| P2RY11  | NIH      | MRS2980     | Antagonist | 10              | 375660   | 2%           |
| P2RY12  | NIH      | MRS2980     | Antagonist | 10              | 1568140  | 22%          |
| P2RY2   | NIH      | MRS2980     | Antagonist | 10              | 1186380  | -6%          |
| P2RY4   | NIH      | MRS2980     | Antagonist | 10              | 1128240  | 4%           |
| P2RY6   | NIH      | MRS2980     | Antagonist | 10              | 1359880  | 8%           |
| PPYR1   | NIH      | MRS2980     | Antagonist | 10              | 923460   | -2%          |
| PRUR    | NIH      | MRS2980     | Antagonist | 10              | 160720   | -7%          |
| PROKR1  | NIH      | MRS2980     | Antagonist | 10              | 490560   | 14%          |
| PROKR2  | NIH      | MRS2980     | Antagonist | 10              | 177380   | -12%         |
| PTAFR   | NIH      | MRS2980     | Antagonist | 10              | 3483200  | 10%          |
| PTGER2  | NIH      | MRS2980     | Antagonist | 10              | 108780   | -3%          |
| PTGER3  | NIH      | MRS2980     | Antagonist | 10              | 1172640  | 1%           |
| PTGER4  | NIH      | MRS2980     | Antagonist | 10              | 771540   | 2%           |
| PTGER   | NIH      | MRS2980     | Antagonist | 10              | 324100   | 3%           |
| PTGIR   | NIH      | MRS2980     | Antagonist | 10              | 500220   | -1%          |
| PTH1R   | NIH      | MRS2980     | Antagonist | 10              | 2466380  | 3%           |
| PTH2R   | NIH      | MRS2980     | Antagonist | 10              | 2659460  | 1%           |
| RXFP3   | NIH      | MRS2980     | Antagonist | 10              | 195020   | -21%         |
| SCR     | NIH      | MRS2980     | Antagonist | 10              | 2167060  | 6%           |
| SSTR1   | NIH      | MRS2980     | Antagonist | 10              | 60200    | -6%          |
| SSTR2   | NIH      | MRS2980     | Antagonist | 10              | 593180   | -16%         |
| SSTR3   | NIH      | MRS2980     | Antagonist | 10              | 617680   | 6%           |
| SSTR3   | NIH      | MRS2980     | Antagonist | 10              | 858480   | -4%          |
| TACR1   | NIH      | MRS2980     | Antagonist | 10              | 3467800  | 5%           |
| TACR2   | NIH      | MRS2980     | Antagonist | 10              | 1940400  | -8%          |
| TACR3   | NIH      | MRS2980     | Antagonist | 10              | 2155720  | 5%           |
| TBA2R   | NIH      | MRS2980     | Antagonist | 10              | 921340   | -6%          |
| TRHR    | NIH      | MRS2980     | Antagonist | 10              | 349720   | -1%          |
| TSHRL   | NIH      | MRS2980     | Antagonist | 10              | 44940    | -1%          |
| UTR2    | NIH      | MRS2980     | Antagonist | 10              | 131180   | -8%          |
| VPR1    | NIH      | MRS2980     | Antagonist | 10              | 3254440  | -5%          |
| VPR2    | NIH      | MRS2980     | Antagonist | 10              | 3901240  | 1%           |



C. Compound 4 (10  $\mu$ M) tested as agonist in a screen of 73 orphan GPCRs (OrphanMAX). No agonist hits were found. Compounds were tested at the concentration shown in the table. Basal control activity is given. Raw activity (RLU units) of individual replicates and mean RLU and percentage activity are shown. Percentage activity was calculated relative to the basal activity for each orphan GPCR target.

| GPCR ID | Customer | Baseline Vehicle | Mean RLU | SD     | %CV | Compound ID | Assay Mode | Test Conc ( $\mu$ M) | Rep 1 RLU | Rep 2 RLU | Mean RLU | SD     | %CV | % Activity |
|---------|----------|------------------|----------|--------|-----|-------------|------------|----------------------|-----------|-----------|----------|--------|-----|------------|
| BAI1    | NIH      | DMSO             | 119665   | 12304  | 10% | MRS5980     | Agonist    | 10                   | 116760    | 118160    | 117460   | 990    | 1%  | -2%        |
| BAI2    | NIH      | DMSO             | 206710   | 9061   | 4%  | MRS5980     | Agonist    | 10                   | 211400    | 206080    | 208740   | 3762   | 2%  | 1%         |
| BAI3    | NIH      | DMSO             | 133823   | 9532   | 7%  | MRS5980     | Agonist    | 10                   | 127400    | 122360    | 124880   | 3564   | 3%  | -7%        |
| CCRL2   | NIH      | DMSO             | 17815    | 1942   | 11% | MRS5980     | Agonist    | 10                   | 15120     | 15400     | 15260    | 198    | 1%  | -14%       |
| DARC    | NIH      | DMSO             | 226135   | 17207  | 8%  | MRS5980     | Agonist    | 10                   | 199080    | 193200    | 196140   | 4158   | 2%  | -13%       |
| GHSR1B  | NIH      | DMSO             | 161595   | 2641   | 2%  | MRS5980     | Agonist    | 10                   | 151200    | 144200    | 147700   | 4950   | 3%  | -9%        |
| GPR101  | NIH      | DMSO             | 169733   | 11857  | 7%  | MRS5980     | Agonist    | 10                   | 148680    | 149520    | 149100   | 594    | 0%  | -12%       |
| GPR107  | NIH      | DMSO             | 1621900  | 89951  | 6%  | MRS5980     | Agonist    | 10                   | 1423800   | 1483720   | 1453760  | 42370  | 3%  | -10%       |
| GPR12   | NIH      | DMSO             | 85190    | 4063   | 5%  | MRS5980     | Agonist    | 10                   | 81760     | 83440     | 82600    | 1188   | 1%  | -3%        |
| GPR123  | NIH      | DMSO             | 3536540  | 143811 | 4%  | MRS5980     | Agonist    | 10                   | 3592120   | 3557960   | 3575040  | 24155  | 1%  | 1%         |
| GPR132  | NIH      | DMSO             | 1586900  | 178177 | 11% | MRS5980     | Agonist    | 10                   | 1206240   | 1182160   | 1194200  | 17027  | 1%  | -25%       |
| GPR135  | NIH      | DMSO             | 36383    | 2710   | 7%  | MRS5980     | Agonist    | 10                   | 36400     | 37800     | 37100    | 990    | 3%  | 2%         |
| GPR137  | NIH      | DMSO             | 75968    | 4795   | 6%  | MRS5980     | Agonist    | 10                   | 72800     | 78120     | 75460    | 3762   | 5%  | -1%        |
| GPR139  | NIH      | DMSO             | 1166480  | 55521  | 5%  | MRS5980     | Agonist    | 10                   | 1168720   | 1086680   | 1127700  | 58011  | 5%  | -3%        |
| GPR141  | NIH      | DMSO             | 24378    | 2630   | 11% | MRS5980     | Agonist    | 10                   | 30800     | 24360     | 27580    | 4554   | 17% | 13%        |
| GPR142  | NIH      | DMSO             | 166268   | 16839  | 10% | MRS5980     | Agonist    | 10                   | 144760    | 150920    | 147840   | 4356   | 3%  | -11%       |
| GPR143  | NIH      | DMSO             | 172410   | 11103  | 6%  | MRS5980     | Agonist    | 10                   | 169960    | 199080    | 184520   | 20591  | 11% | 7%         |
| GPR146  | NIH      | DMSO             | 35945    | 1451   | 4%  | MRS5980     | Agonist    | 10                   | 38080     | 39200     | 38640    | 792    | 2%  | 7%         |
| GPR148  | NIH      | DMSO             | 129133   | 12473  | 10% | MRS5980     | Agonist    | 10                   | 135520    | 118720    | 127120   | 11879  | 9%  | -2%        |
| GPR149  | NIH      | DMSO             | 42893    | 3872   | 9%  | MRS5980     | Agonist    | 10                   | 38920     | 33040     | 35980    | 4158   | 12% | -16%       |
| GPR15   | NIH      | DMSO             | 27510    | 2853   | 10% | MRS5980     | Agonist    | 10                   | 26040     | 24920     | 25480    | 792    | 3%  | -7%        |
| GPR150  | NIH      | DMSO             | 617610   | 35895  | 6%  | MRS5980     | Agonist    | 10                   | 614880    | 579880    | 597380   | 24749  | 4%  | -3%        |
| GPR151  | NIH      | DMSO             | 482685   | 25111  | 5%  | MRS5980     | Agonist    | 10                   | 455840    | 432040    | 443940   | 16829  | 4%  | -8%        |
| GPR152  | NIH      | DMSO             | 360658   | 16188  | 4%  | MRS5980     | Agonist    | 10                   | 343280    | 345800    | 344540   | 1782   | 1%  | -4%        |
| GPR157  | NIH      | DMSO             | 2059365  | 181944 | 9%  | MRS5980     | Agonist    | 10                   | 1662080   | 1601320   | 1631700  | 42964  | 3%  | -21%       |
| GPR161  | NIH      | DMSO             | 18130    | 5045   | 28% | MRS5980     | Agonist    | 10                   | 16240     | 14560     | 15400    | 1188   | 8%  | -15%       |
| GPR162  | NIH      | DMSO             | 53253    | 5824   | 11% | MRS5980     | Agonist    | 10                   | 45640     | 47880     | 46760    | 1584   | 3%  | -12%       |
| GPR17   | NIH      | DMSO             | 74393    | 5109   | 7%  | MRS5980     | Agonist    | 10                   | 67200     | 70280     | 68740    | 2178   | 3%  | -8%        |
| GPR171  | NIH      | DMSO             | 259963   | 46637  | 18% | MRS5980     | Agonist    | 10                   | 220080    | 225680    | 222880   | 3960   | 2%  | -14%       |
| GPR173  | NIH      | DMSO             | 93660    | 6903   | 7%  | MRS5980     | Agonist    | 10                   | 91000     | 82880     | 86940    | 5742   | 7%  | -7%        |
| GPR176  | NIH      | DMSO             | 1042825  | 67715  | 6%  | MRS5980     | Agonist    | 10                   | 989240    | 978880    | 984060   | 7326   | 1%  | -6%        |
| GPR18   | NIH      | DMSO             | 95305    | 19705  | 21% | MRS5980     | Agonist    | 10                   | 81760     | 90440     | 86100    | 6138   | 7%  | -10%       |
| GPR182  | NIH      | DMSO             | 2403800  | 81460  | 3%  | MRS5980     | Agonist    | 10                   | 2394560   | 2211720   | 2303140  | 129287 | 6%  | -4%        |
| GPR20   | NIH      | DMSO             | 48983    | 4320   | 9%  | MRS5980     | Agonist    | 10                   | 52920     | 48160     | 50540    | 3366   | 7%  | 3%         |
| GPR23   | NIH      | DMSO             | 2058823  | 81290  | 4%  | MRS5980     | Agonist    | 10                   | 2025240   | 1825880   | 1925560  | 140969 | 7%  | -6%        |
| GPR25   | NIH      | DMSO             | 160213   | 8225   | 5%  | MRS5980     | Agonist    | 10                   | 159880    | 150080    | 154980   | 6930   | 4%  | -3%        |
| GPR26   | NIH      | DMSO             | 147193   | 17454  | 12% | MRS5980     | Agonist    | 10                   | 119840    | 129360    | 124600   | 6732   | 5%  | -15%       |
| GPR27   | NIH      | DMSO             | 145723   | 10909  | 7%  | MRS5980     | Agonist    | 10                   | 146720    | 141960    | 144340   | 3366   | 2%  | -1%        |
| GPR3    | NIH      | DMSO             | 1949430  | 122326 | 6%  | MRS5980     | Agonist    | 10                   | 2020200   | 1867880   | 1944040  | 107707 | 6%  | 0%         |
| GPR30   | NIH      | DMSO             | 749420   | 45689  | 6%  | MRS5980     | Agonist    | 10                   | 732480    | 714560    | 723520   | 12671  | 2%  | -3%        |
| GPR31   | NIH      | DMSO             | 25200    | 1838   | 7%  | MRS5980     | Agonist    | 10                   | 27440     | 23800     | 25620    | 2574   | 10% | 2%         |
| GPR32   | NIH      | DMSO             | 169890   | 7335   | 4%  | MRS5980     | Agonist    | 10                   | 168000    | 164360    | 166180   | 2574   | 2%  | -2%        |
| GPR37   | NIH      | DMSO             | 2048288  | 164658 | 8%  | MRS5980     | Agonist    | 10                   | 1756720   | 1648640   | 1702680  | 76424  | 4%  | -17%       |
| GPR37L1 | NIH      | DMSO             | 58783    | 5826   | 10% | MRS5980     | Agonist    | 10                   | 57680     | 63280     | 60480    | 3960   | 7%  | 3%         |
| GPR39   | NIH      | DMSO             | 1036805  | 80353  | 8%  | MRS5980     | Agonist    | 10                   | 1039920   | 1168720   | 1104320  | 91075  | 8%  | 7%         |
| GPR4    | NIH      | DMSO             | 527328   | 78090  | 15% | MRS5980     | Agonist    | 10                   | 494200    | 472640    | 483420   | 15245  | 3%  | -8%        |
| GPR45   | NIH      | DMSO             | 1098615  | 59665  | 5%  | MRS5980     | Agonist    | 10                   | 1142960   | 1061480   | 1102220  | 57615  | 5%  | 0%         |
| GPR50   | NIH      | DMSO             | 3523503  | 99560  | 3%  | MRS5980     | Agonist    | 10                   | 3359440   | 3365320   | 3362380  | 4158   | 0%  | -5%        |
| GPR52   | NIH      | DMSO             | 289958   | 22877  | 8%  | MRS5980     | Agonist    | 10                   | 307720    | 298760    | 303240   | 6336   | 2%  | 5%         |
| GPR55   | NIH      | DMSO             | 1709838  | 86214  | 5%  | MRS5980     | Agonist    | 10                   | 1638560   | 1557080   | 1597820  | 57615  | 4%  | -7%        |
| GPR6    | NIH      | DMSO             | 38868    | 2486   | 6%  | MRS5980     | Agonist    | 10                   | 41440     | 36680     | 39060    | 3366   | 9%  | 0%         |
| GPR61   | NIH      | DMSO             | 352888   | 16556  | 5%  | MRS5980     | Agonist    | 10                   | 340760    | 345800    | 343280   | 3564   | 1%  | -3%        |
| GPR65   | NIH      | DMSO             | 151060   | 10637  | 7%  | MRS5980     | Agonist    | 10                   | 143920    | 122640    | 133280   | 15047  | 11% | -12%       |
| GPR75   | NIH      | DMSO             | 116253   | 8115   | 7%  | MRS5980     | Agonist    | 10                   | 96320     | 106400    | 101360   | 7128   | 7%  | -13%       |
| GPR78   | NIH      | DMSO             | 85663    | 5624   | 7%  | MRS5980     | Agonist    | 10                   | 75600     | 77280     | 76440    | 1188   | 2%  | -11%       |
| GPR79   | NIH      | DMSO             | 138723   | 12178  | 9%  | MRS5980     | Agonist    | 10                   | 136920    | 133000    | 134960   | 2772   | 2%  | -3%        |
| GPR83   | NIH      | DMSO             | 942183   | 60023  | 6%  | MRS5980     | Agonist    | 10                   | 895440    | 821520    | 858480   | 52269  | 6%  | -9%        |
| GPR84   | NIH      | DMSO             | 205065   | 27138  | 13% | MRS5980     | Agonist    | 10                   | 213640    | 216440    | 215040   | 1980   | 1%  | 5%         |
| GPR85   | NIH      | DMSO             | 433755   | 47056  | 11% | MRS5980     | Agonist    | 10                   | 376600    | 415240    | 395920   | 27323  | 7%  | -9%        |
| GPR88   | NIH      | DMSO             | 46130    | 4637   | 10% | MRS5980     | Agonist    | 10                   | 44520     | 40040     | 42280    | 3168   | 7%  | -8%        |
| GPR91   | NIH      | DMSO             | 807940   | 101237 | 13% | MRS5980     | Agonist    | 10                   | 798000    | 632520    | 715260   | 117012 | 16% | -11%       |
| GPR97   | NIH      | DMSO             | 3703228  | 120664 | 3%  | MRS5980     | Agonist    | 10                   | 3598560   | 3627120   | 3612840  | 20195  | 1%  | -2%        |
| LGR4    | NIH      | DMSO             | 28683    | 3564   | 12% | MRS5980     | Agonist    | 10                   | 24080     | 19040     | 21560    | 3564   | 17% | -25%       |
| LGR5    | NIH      | DMSO             | 144165   | 8030   | 6%  | MRS5980     | Agonist    | 10                   | 151200    | 135800    | 143500   | 10889  | 8%  | 0%         |
| LGR6    | NIH      | DMSO             | 33250    | 4670   | 14% | MRS5980     | Agonist    | 10                   | 24360     | 23240     | 23800    | 792    | 3%  | -28%       |
| MRGPRD  | NIH      | DMSO             | 130095   | 7913   | 6%  | MRS5980     | Agonist    | 10                   | 122640    | 103880    | 113260   | 13265  | 12% | -13%       |
| MRGPPE  | NIH      | DMSO             | 393593   | 20992  | 5%  | MRS5980     | Agonist    | 10                   | 384720    | 392560    | 388640   | 5544   | 1%  | -1%        |
| MRGPRF  | NIH      | DMSO             | 2059068  | 82876  | 4%  | MRS5980     | Agonist    | 10                   | 2066120   | 2168880   | 2117500  | 72662  | 3%  | 3%         |
| MRGPRX4 | NIH      | DMSO             | 221515   | 22553  | 10% | MRS5980     | Agonist    | 10                   | 215880    | 242200    | 229040   | 18611  | 8%  | 3%         |
| OPN5    | NIH      | DMSO             | 635635   | 35710  | 6%  | MRS5980     | Agonist    | 10                   | 604520    | 628600    | 616560   | 17027  | 3%  | -3%        |
| OXGR1   | NIH      | DMSO             | 395693   | 23786  | 6%  | MRS5980     | Agonist    | 10                   | 401520    | 370160    | 385840   | 22175  | 6%  | -2%        |
| P2RY8   | NIH      | DMSO             | 3050040  | 110986 | 4%  | MRS5980     | Agonist    | 10                   | 2866360   | 2902200   | 2884280  | 25343  | 1%  | -5%        |
| TAAR5   | NIH      | DMSO             | 189175   | 8393   | 4%  | MRS5980     | Agonist    | 10                   | 172480    | 178920    | 175700   | 4554   | 3%  | -7%        |



D. Compound **4** (10  $\mu$ M) tested as antagonist in a screen of 73 orphan GPCRs (OrphanMAX).

No antagonist hits were found.

| GPCR ID  | Customer | Baseline Vehicle | Mean RLU | SD     | %CV | Compound ID | Assay Mode | Test Conc ( $\mu$ M) | Rep 1 RLU | Rep 2 RLU | Mean RLU | SD     | %CV | % Activity |
|----------|----------|------------------|----------|--------|-----|-------------|------------|----------------------|-----------|-----------|----------|--------|-----|------------|
| BAI1     | NIH      | DMSO             | 119665   | 12304  | 10% | MRS7154     | Agonist    | 10                   | 109480    | 113680    | 111580   | 2970   | 3%  | -7%        |
| BAI2     | NIH      | DMSO             | 206710   | 9061   | 4%  | MRS7154     | Agonist    | 10                   | 194040    | 186760    | 190400   | 5148   | 3%  | -8%        |
| BAI3     | NIH      | DMSO             | 133823   | 9532   | 7%  | MRS7154     | Agonist    | 10                   | 105280    | 100800    | 103040   | 3168   | 3%  | -23%       |
| CCRL2    | NIH      | DMSO             | 17815    | 1942   | 11% | MRS7154     | Agonist    | 10                   | 15680     | 14280     | 14980    | 990    | 7%  | -16%       |
| DARC     | NIH      | DMSO             | 226135   | 17207  | 8%  | MRS7154     | Agonist    | 10                   | 199360    | 194320    | 196840   | 3564   | 2%  | -13%       |
| GHSR18   | NIH      | DMSO             | 161595   | 2641   | 2%  | MRS7154     | Agonist    | 10                   | 132720    | 127680    | 130200   | 3564   | 3%  | -19%       |
| GPR101   | NIH      | DMSO             | 169733   | 11857  | 7%  | MRS7154     | Agonist    | 10                   | 159320    | 153440    | 156380   | 4158   | 3%  | -8%        |
| GPR107   | NIH      | DMSO             | 1621900  | 89951  | 6%  | MRS7154     | Agonist    | 10                   | 1527400   | 1667960   | 1597680  | 99391  | 6%  | -1%        |
| GPR12    | NIH      | DMSO             | 85190    | 4063   | 5%  | MRS7154     | Agonist    | 10                   | 86800     | 77840     | 82320    | 6336   | 8%  | -3%        |
| GPR123   | NIH      | DMSO             | 3536540  | 143811 | 4%  | MRS7154     | Agonist    | 10                   | 3665480   | 3863440   | 3764460  | 139979 | 4%  | 6%         |
| GPR132   | NIH      | DMSO             | 1586900  | 178177 | 11% | MRS7154     | Agonist    | 10                   | 929320    | 875280    | 902300   | 38212  | 4%  | -43%       |
| GPR135   | NIH      | DMSO             | 36383    | 2710   | 7%  | MRS7154     | Agonist    | 10                   | 48160     | 42560     | 45360    | 3960   | 9%  | 25%        |
| GPR137   | NIH      | DMSO             | 75968    | 4795   | 6%  | MRS7154     | Agonist    | 10                   | 65240     | 67760     | 66500    | 1782   | 3%  | -12%       |
| GPR139   | NIH      | DMSO             | 1166480  | 55521  | 5%  | MRS7154     | Agonist    | 10                   | 1081640   | 1052240   | 1066940  | 20789  | 2%  | -9%        |
| GPR141   | NIH      | DMSO             | 24378    | 2630   | 11% | MRS7154     | Agonist    | 10                   | 24920     | 21560     | 23240    | 2376   | 10% | -5%        |
| GPR142   | NIH      | DMSO             | 166268   | 16839  | 10% | MRS7154     | Agonist    | 10                   | 167720    | 150920    | 159320   | 11879  | 7%  | -4%        |
| GPR143   | NIH      | DMSO             | 172410   | 11103  | 6%  | MRS7154     | Agonist    | 10                   | 163800    | 191240    | 177520   | 19403  | 11% | 3%         |
| GPR146   | NIH      | DMSO             | 35945    | 1451   | 4%  | MRS7154     | Agonist    | 10                   | 32480     | 35280     | 33880    | 1980   | 6%  | -6%        |
| GPR148   | NIH      | DMSO             | 129133   | 12473  | 10% | MRS7154     | Agonist    | 10                   | 97160     | 106960    | 102060   | 6930   | 7%  | -21%       |
| GPR149   | NIH      | DMSO             | 42893    | 3872   | 9%  | MRS7154     | Agonist    | 10                   | 48160     | 35560     | 41860    | 8910   | 21% | -2%        |
| GPR15    | NIH      | DMSO             | 27510    | 2853   | 10% | MRS7154     | Agonist    | 10                   | 22680     | 23800     | 23240    | 792    | 3%  | -16%       |
| GPR150   | NIH      | DMSO             | 617610   | 35895  | 6%  | MRS7154     | Agonist    | 10                   | 638120    | 566720    | 602420   | 50487  | 8%  | -2%        |
| GPR151   | NIH      | DMSO             | 482685   | 25111  | 5%  | MRS7154     | Agonist    | 10                   | 397600    | 423920    | 410760   | 18611  | 5%  | -15%       |
| GPR152   | NIH      | DMSO             | 360658   | 16188  | 4%  | MRS7154     | Agonist    | 10                   | 333480    | 357280    | 345380   | 16829  | 5%  | -4%        |
| GPR157   | NIH      | DMSO             | 2059365  | 181944 | 9%  | MRS7154     | Agonist    | 10                   | 1741880   | 1624560   | 1683220  | 82958  | 5%  | -18%       |
| GPR161   | NIH      | DMSO             | 18130    | 5045   | 28% | MRS7154     | Agonist    | 10                   | 16520     | 15400     | 15960    | 792    | 5%  | -12%       |
| GPR162   | NIH      | DMSO             | 53253    | 5824   | 11% | MRS7154     | Agonist    | 10                   | 45920     | 42000     | 43960    | 2772   | 6%  | -17%       |
| GPR17    | NIH      | DMSO             | 74393    | 5109   | 7%  | MRS7154     | Agonist    | 10                   | 72240     | 69440     | 70840    | 1980   | 3%  | -5%        |
| GPR171   | NIH      | DMSO             | 259963   | 46637  | 18% | MRS7154     | Agonist    | 10                   | 218120    | 199360    | 208740   | 13265  | 6%  | -20%       |
| GPR173   | NIH      | DMSO             | 93660    | 6903   | 7%  | MRS7154     | Agonist    | 10                   | 83440     | 78400     | 80920    | 3564   | 4%  | -14%       |
| GPR176   | NIH      | DMSO             | 1042825  | 67715  | 6%  | MRS7154     | Agonist    | 10                   | 976080    | 983080    | 979580   | 4950   | 1%  | -6%        |
| GPR18    | NIH      | DMSO             | 95305    | 19705  | 21% | MRS7154     | Agonist    | 10                   | 87080     | 82600     | 84840    | 3168   | 4%  | -11%       |
| GPR182   | NIH      | DMSO             | 2403800  | 81460  | 3%  | MRS7154     | Agonist    | 10                   | 2230480   | 2479400   | 2354940  | 176013 | 7%  | -2%        |
| GPR20    | NIH      | DMSO             | 48983    | 4320   | 9%  | MRS7154     | Agonist    | 10                   | 41720     | 42560     | 42140    | 594    | 1%  | -14%       |
| GPR23    | NIH      | DMSO             | 2058823  | 81290  | 4%  | MRS7154     | Agonist    | 10                   | 1841280   | 1820560   | 1830920  | 14651  | 1%  | -11%       |
| GPR25    | NIH      | DMSO             | 160213   | 8225   | 5%  | MRS7154     | Agonist    | 10                   | 151200    | 136920    | 144060   | 10097  | 7%  | -10%       |
| GPR26    | NIH      | DMSO             | 147193   | 17454  | 12% | MRS7154     | Agonist    | 10                   | 127960    | 129920    | 128940   | 1386   | 1%  | -12%       |
| GPR27    | NIH      | DMSO             | 145723   | 10909  | 7%  | MRS7154     | Agonist    | 10                   | 125160    | 127960    | 126560   | 1980   | 2%  | -13%       |
| GPR3     | NIH      | DMSO             | 1949430  | 122326 | 6%  | MRS7154     | Agonist    | 10                   | 1862560   | 1847720   | 1855140  | 10493  | 1%  | -5%        |
| GPR30    | NIH      | DMSO             | 749420   | 45689  | 6%  | MRS7154     | Agonist    | 10                   | 711480    | 738920    | 725200   | 19403  | 3%  | -3%        |
| GPR31    | NIH      | DMSO             | 25200    | 1838   | 7%  | MRS7154     | Agonist    | 10                   | 23240     | 21280     | 22260    | 1386   | 6%  | -12%       |
| GPR32    | NIH      | DMSO             | 169890   | 7335   | 4%  | MRS7154     | Agonist    | 10                   | 147000    | 145600    | 146300   | 990    | 1%  | -14%       |
| GPR37    | NIH      | DMSO             | 2048288  | 164658 | 8%  | MRS7154     | Agonist    | 10                   | 1803200   | 1319080   | 1561140  | 342325 | 22% | -24%       |
| GPR37L1  | NIH      | DMSO             | 58783    | 5826   | 10% | MRS7154     | Agonist    | 10                   | 68040     | 57120     | 62580    | 7722   | 12% | 6%         |
| GPR39    | NIH      | DMSO             | 1036805  | 80353  | 8%  | MRS7154     | Agonist    | 10                   | 1001000   | 1008560   | 1004780  | 5346   | 1%  | -3%        |
| GPR4     | NIH      | DMSO             | 527328   | 78090  | 15% | MRS7154     | Agonist    | 10                   | 509880    | 602280    | 556080   | 65337  | 12% | 5%         |
| GPR45    | NIH      | DMSO             | 1098615  | 59665  | 5%  | MRS7154     | Agonist    | 10                   | 1071560   | 1091720   | 1081640  | 14255  | 1%  | -2%        |
| GPR50    | NIH      | DMSO             | 3523503  | 99560  | 3%  | MRS7154     | Agonist    | 10                   | 3177160   | 3131240   | 3154200  | 32470  | 1%  | -10%       |
| GPR52    | NIH      | DMSO             | 289958   | 22877  | 8%  | MRS7154     | Agonist    | 10                   | 308000    | 272160    | 290080   | 25343  | 9%  | 0%         |
| GPR55    | NIH      | DMSO             | 1709838  | 86214  | 5%  | MRS7154     | Agonist    | 10                   | 1388240   | 1393560   | 1390900  | 3762   | 0%  | -19%       |
| GPR6     | NIH      | DMSO             | 38868    | 2486   | 6%  | MRS7154     | Agonist    | 10                   | 33040     | 34440     | 33740    | 990    | 3%  | -13%       |
| GPR61    | NIH      | DMSO             | 352888   | 16556  | 5%  | MRS7154     | Agonist    | 10                   | 322840    | 339920    | 331380   | 12077  | 4%  | -6%        |
| GPR65    | NIH      | DMSO             | 151060   | 10637  | 7%  | MRS7154     | Agonist    | 10                   | 148680    | 144200    | 146440   | 3168   | 2%  | -3%        |
| GPR75    | NIH      | DMSO             | 116253   | 8115   | 7%  | MRS7154     | Agonist    | 10                   | 88480     | 91560     | 90020    | 2178   | 2%  | -23%       |
| GPR78    | NIH      | DMSO             | 85663    | 5624   | 7%  | MRS7154     | Agonist    | 10                   | 75320     | 65240     | 70280    | 7128   | 10% | -18%       |
| GPR79    | NIH      | DMSO             | 138723   | 12178  | 9%  | MRS7154     | Agonist    | 10                   | 122640    | 133840    | 128240   | 7920   | 6%  | -8%        |
| GPR83    | NIH      | DMSO             | 942183   | 60023  | 6%  | MRS7154     | Agonist    | 10                   | 763840    | 774760    | 769300   | 7722   | 1%  | -18%       |
| GPR84    | NIH      | DMSO             | 205065   | 27138  | 13% | MRS7154     | Agonist    | 10                   | 220360    | 201600    | 210980   | 13265  | 6%  | 3%         |
| GPR85    | NIH      | DMSO             | 433755   | 47056  | 11% | MRS7154     | Agonist    | 10                   | 402920    | 402080    | 402500   | 594    | 0%  | -7%        |
| GPR88    | NIH      | DMSO             | 46130    | 4637   | 10% | MRS7154     | Agonist    | 10                   | 45640     | 41720     | 43680    | 2772   | 6%  | -5%        |
| GPR91    | NIH      | DMSO             | 807940   | 101237 | 13% | MRS7154     | Agonist    | 10                   | 714280    | 696640    | 705460   | 12473  | 2%  | -13%       |
| GPR97    | NIH      | DMSO             | 3703228  | 120664 | 3%  | MRS7154     | Agonist    | 10                   | 3541160   | 3641680   | 3591420  | 71078  | 2%  | -3%        |
| LGR4     | NIH      | DMSO             | 28683    | 3564   | 12% | MRS7154     | Agonist    | 10                   | 23520     | 22400     | 22960    | 792    | 3%  | -20%       |
| LGR5     | NIH      | DMSO             | 144165   | 8030   | 6%  | MRS7154     | Agonist    | 10                   | 124040    | 124040    | 124040   | 0      | 0%  | -14%       |
| LGR6     | NIH      | DMSO             | 33250    | 4670   | 14% | MRS7154     | Agonist    | 10                   | 26040     | 27160     | 26600    | 792    | 3%  | -20%       |
| MARGPRD  | NIH      | DMSO             | 130095   | 7913   | 6%  | MRS7154     | Agonist    | 10                   | 106400    | 109200    | 107800   | 1980   | 2%  | -17%       |
| MARGPRE  | NIH      | DMSO             | 393593   | 20992  | 5%  | MRS7154     | Agonist    | 10                   | 376040    | 388080    | 382060   | 8514   | 2%  | -3%        |
| MARGPRF  | NIH      | DMSO             | 2059068  | 82876  | 4%  | MRS7154     | Agonist    | 10                   | 1794520   | 1973160   | 1883840  | 126318 | 7%  | -9%        |
| MARGPRX4 | NIH      | DMSO             | 221515   | 22553  | 10% | MRS7154     | Agonist    | 10                   | 148400    | 188440    | 168420   | 28313  | 17% | -24%       |
| OPN5     | NIH      | DMSO             | 635635   | 35710  | 6%  | MRS7154     | Agonist    | 10                   | 664720    | 698600    | 681660   | 23957  | 4%  | 7%         |
| OXR1     | NIH      | DMSO             | 395693   | 23786  | 6%  | MRS7154     | Agonist    | 10                   | 360360    | 367080    | 363720   | 4752   | 1%  | -8%        |
| P2RY8    | NIH      | DMSO             | 3050040  | 110986 | 4%  | MRS7154     | Agonist    | 10                   | 2687440   | 2846480   | 2766960  | 112458 | 4%  | -9%        |
| TAAR5    | NIH      | DMSO             | 189175   | 8393   | 4%  | MRS7154     | Agonist    | 10                   | 168280    | 148960    | 158620   | 13661  | 9%  | -16%       |

Figure S8. Compound **4** (MRS5980, 10  $\mu$ M) tested as inhibitor in KinomeSCAN screen (DiscoverX).

**MRS5980**

468 Assays Tested  
4 Interactions Mapped  
S-Score(35) = 0.01

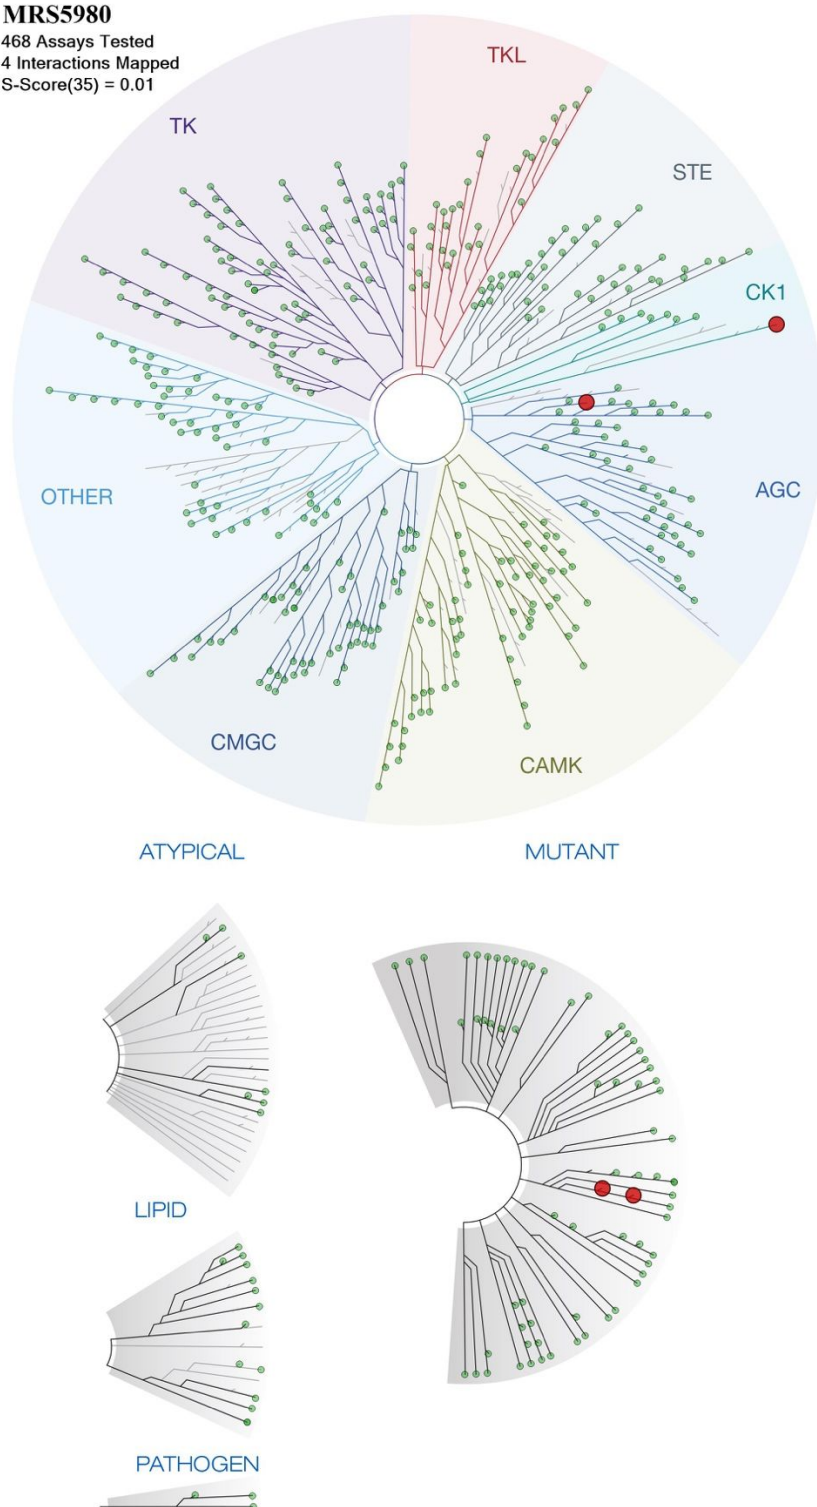

Four weak kinase screening hits (among 403 nonmutant kinases and 63 other kinases) were detected with <50% activity remaining (% inhibition at 10  $\mu$ M **4**): FLT3 (ITD, D835V), 70%; LATS2, 74%; VRK2, 69%. The overall selectivity score was 0.005. All other kinases had >50% activity remaining.

## Representative NMR and Mass Spectra and HPLC Analysis

(All NMR spectra were measured using CD<sub>3</sub>OD as solvent.)

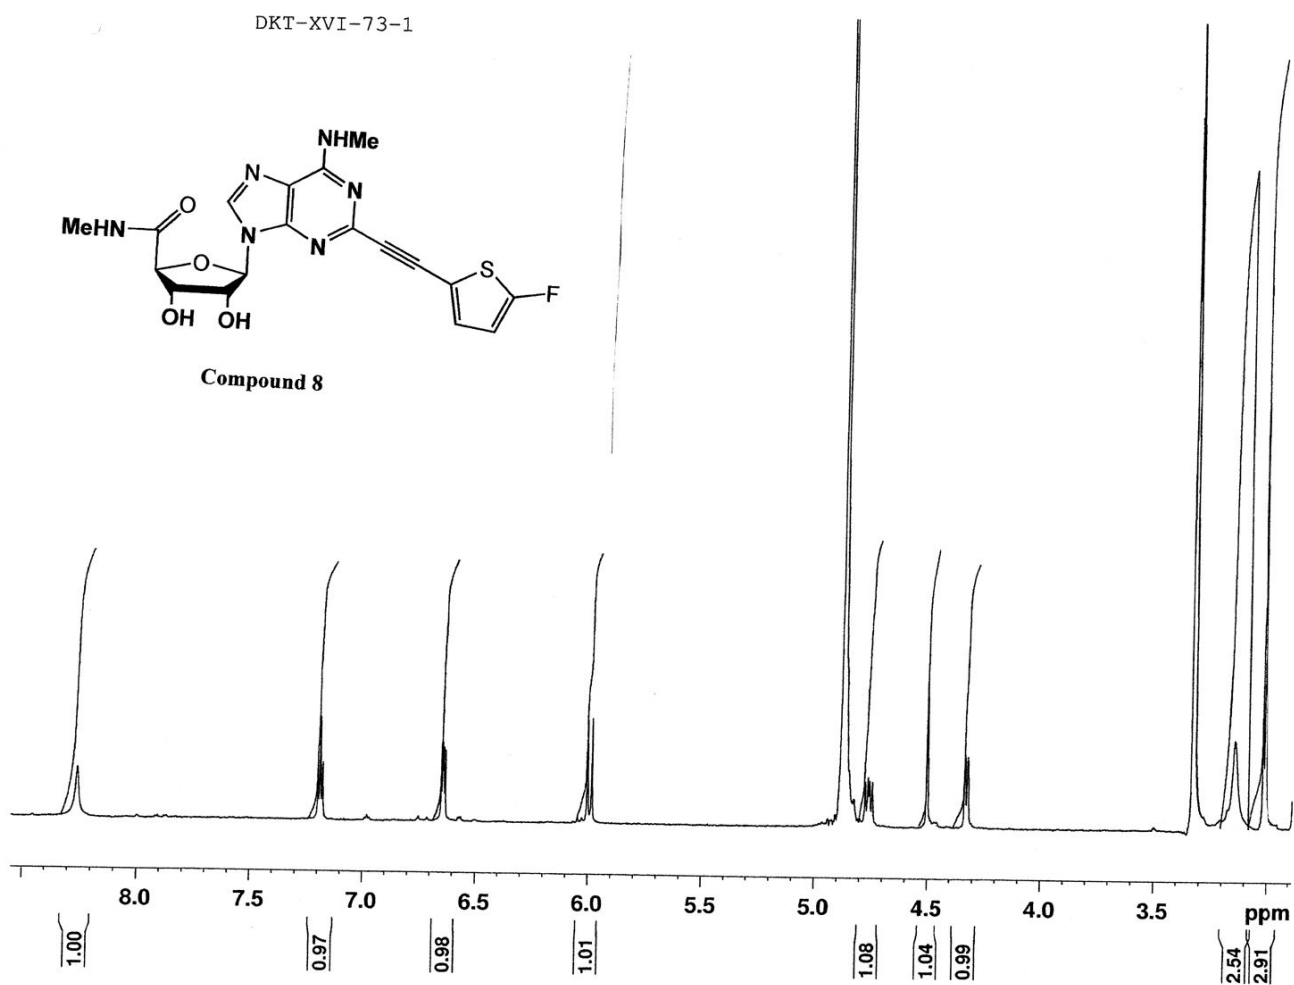



19-Jun-2017

dkt-19jun17-xvi-73 203 (3.754) Cm (203-45x3.000)

TOF MS ES+  
3.71e3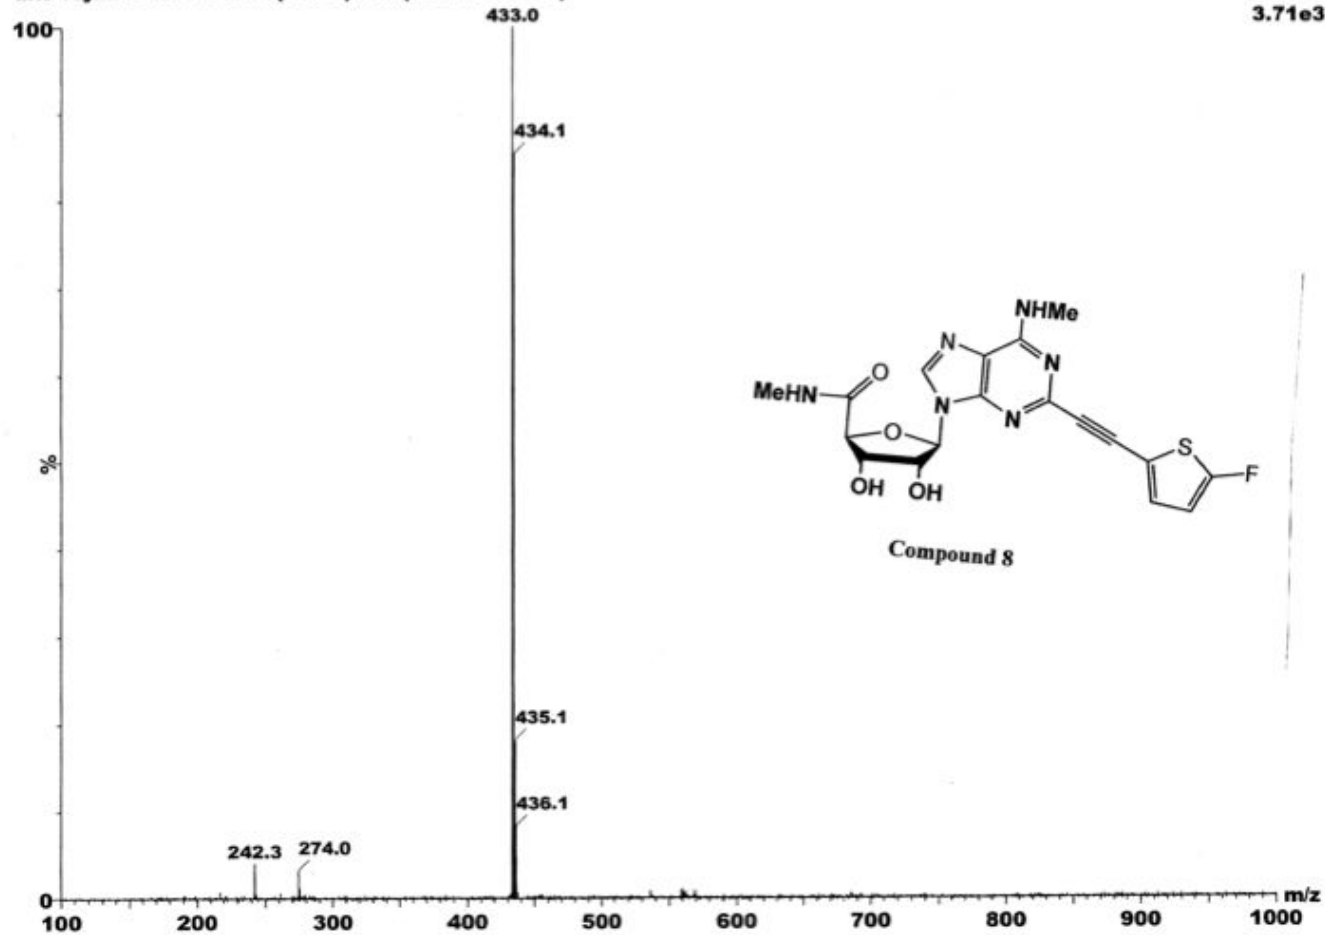

# Elemental Composition Report

## Single Mass Analysis

Tolerance = 10.0 mDa / DBE: min = -2.0, max = 1000.0

Element prediction: Off

Number of isotope peaks used for i-FIT = 3

Monoisotopic Mass, Even Electron Ions

60 formula(e) evaluated with 3 results within limits (up to 19 closest results for each mass)

Elements Used:

C: 0-40 H: 0-200 N: 6-6 O: 0-40 F: 1-1 S: 1-1

19-Jun-2017

dk1-19jun17-xvi-73 207 (3.828) Cn (Cen,5, 50.00, Ar); Sm (SG, 3x5.00); Sb (12.5.00)

TOF MS ES+  
6.95e+003

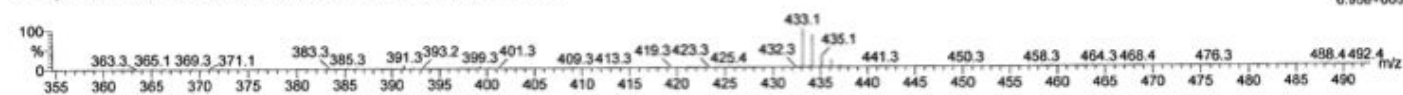

Minimum: -2.0  
Maximum: 10.0 10.0 1000.0

| Mass     | Calc. Mass | mDa  | PPM   | DBE  | i-FIT  | Formula             |
|----------|------------|------|-------|------|--------|---------------------|
| 433.1096 | 433.1094   | 0.2  | 0.5   | 12.5 | 2171.8 | C18 H18 N6 O4 F 32S |
|          | 433.1153   | -5.7 | -13.2 | 3.5  | 2645.1 | C11 H22 N6 O9 F 32S |
|          | 433.1000   | 9.6  | 22.2  | -0.5 | 2957.0 | C7 H22 N6 O12 F 32S |

DKT-XVI-58

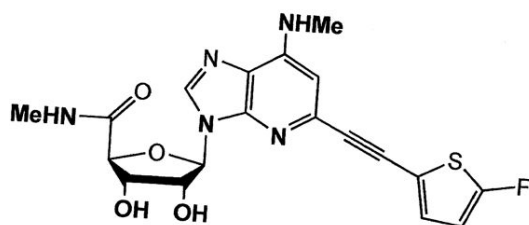

Compound 10

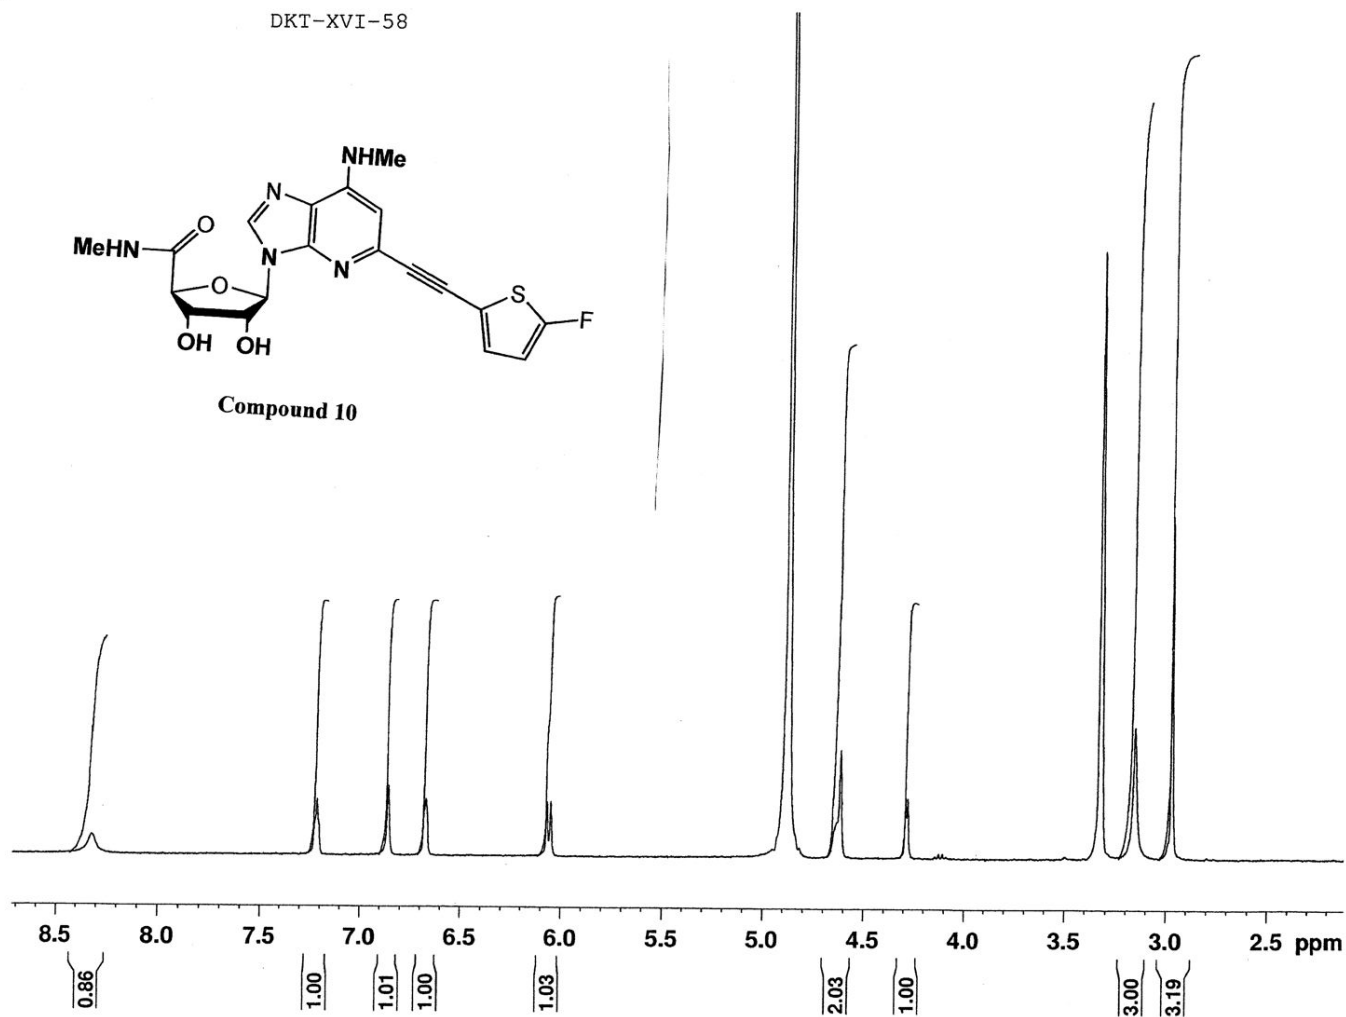



22-May-2017

dkt-22may17-xvi-58 91 (1.683) Sm (SG, 3x5.00); Cm (91-31x3.000)

TOF MS ES+  
3.45e3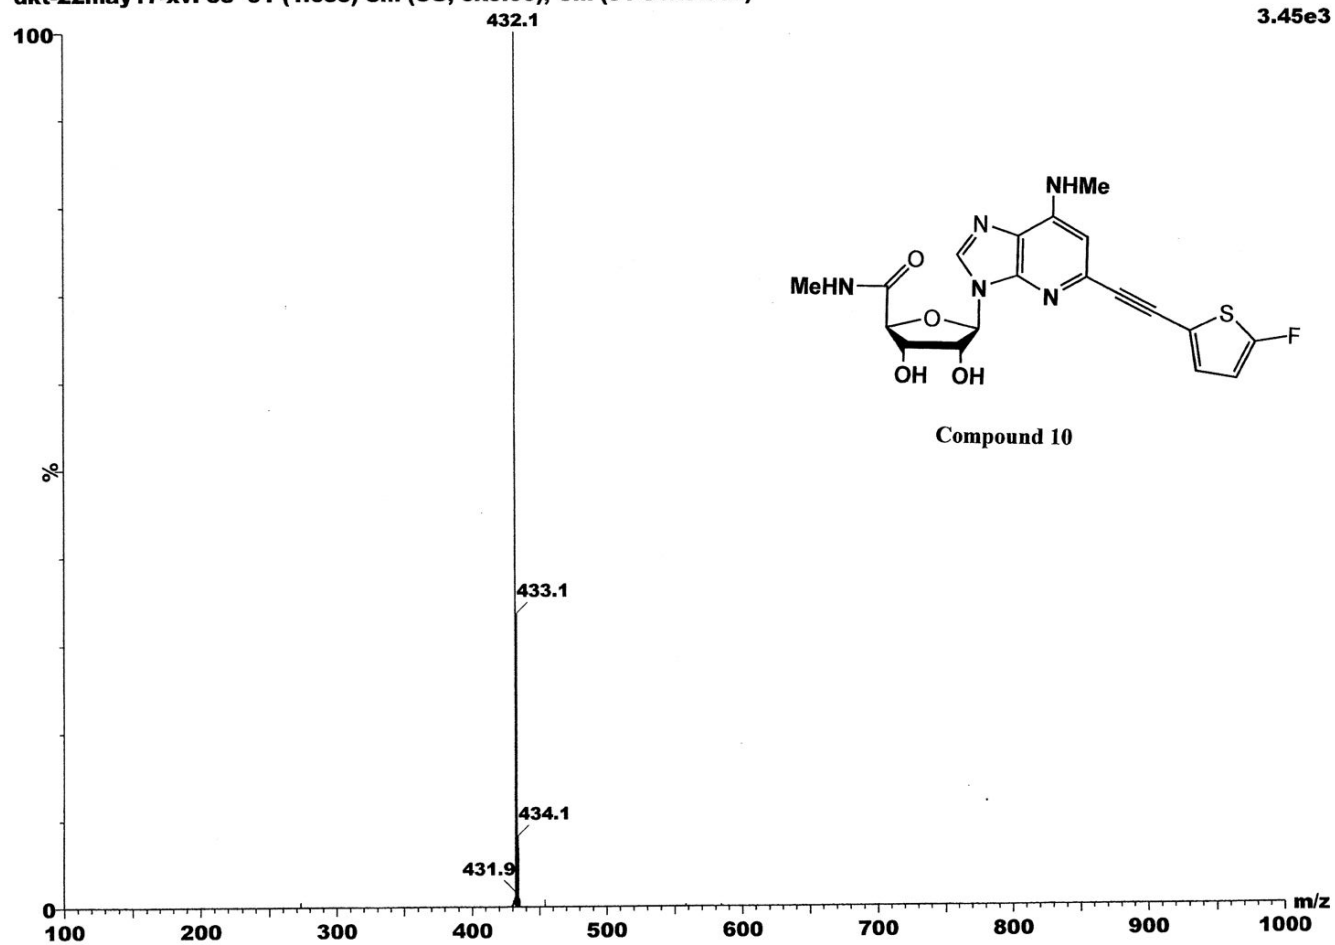

## Elemental Composition Report

Page 1

## Single Mass Analysis

Tolerance = 10.0 mDa / DBE: min = -2.0, max = 1000.0

Element prediction: Off

Number of isotope peaks used for i-FIT = 3

Monoisotopic Mass, Even Electron Ions

68 formula(e) evaluated with 3 results within limits (up to 19 closest results for each mass)

Elements Used:

C: 0-100 H: 0-200 N: 5-5 O: 0-30 F: 1-1 S: 1-1

22-May-2017

dkt-22may17-xvi-58 97 (1.794) Cn (Cen,5, 50.00, Ar); Sm (SG, 3x5.00); Sb (12,5.00)

TOF MS ES+  
4.73e+003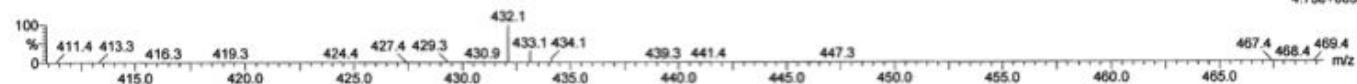

Minimum: -2.0  
Maximum: 10.0 10.0 1000.0

| Mass     | Calc. Mass | mDa  | PPM   | DBE  | i-FIT | Formula             |
|----------|------------|------|-------|------|-------|---------------------|
| 432.1141 | 432.1142   | -0.1 | -0.2  | 12.5 | 135.0 | C19 H19 N5 O4 F 32S |
|          | 432.1201   | -6.0 | -13.9 | 3.5  | 268.8 | C12 H23 N5 O9 F 32S |
|          | 432.1048   | 9.3  | 21.5  | -0.5 | 393.0 | C8 H23 N5 O12 F 32S |

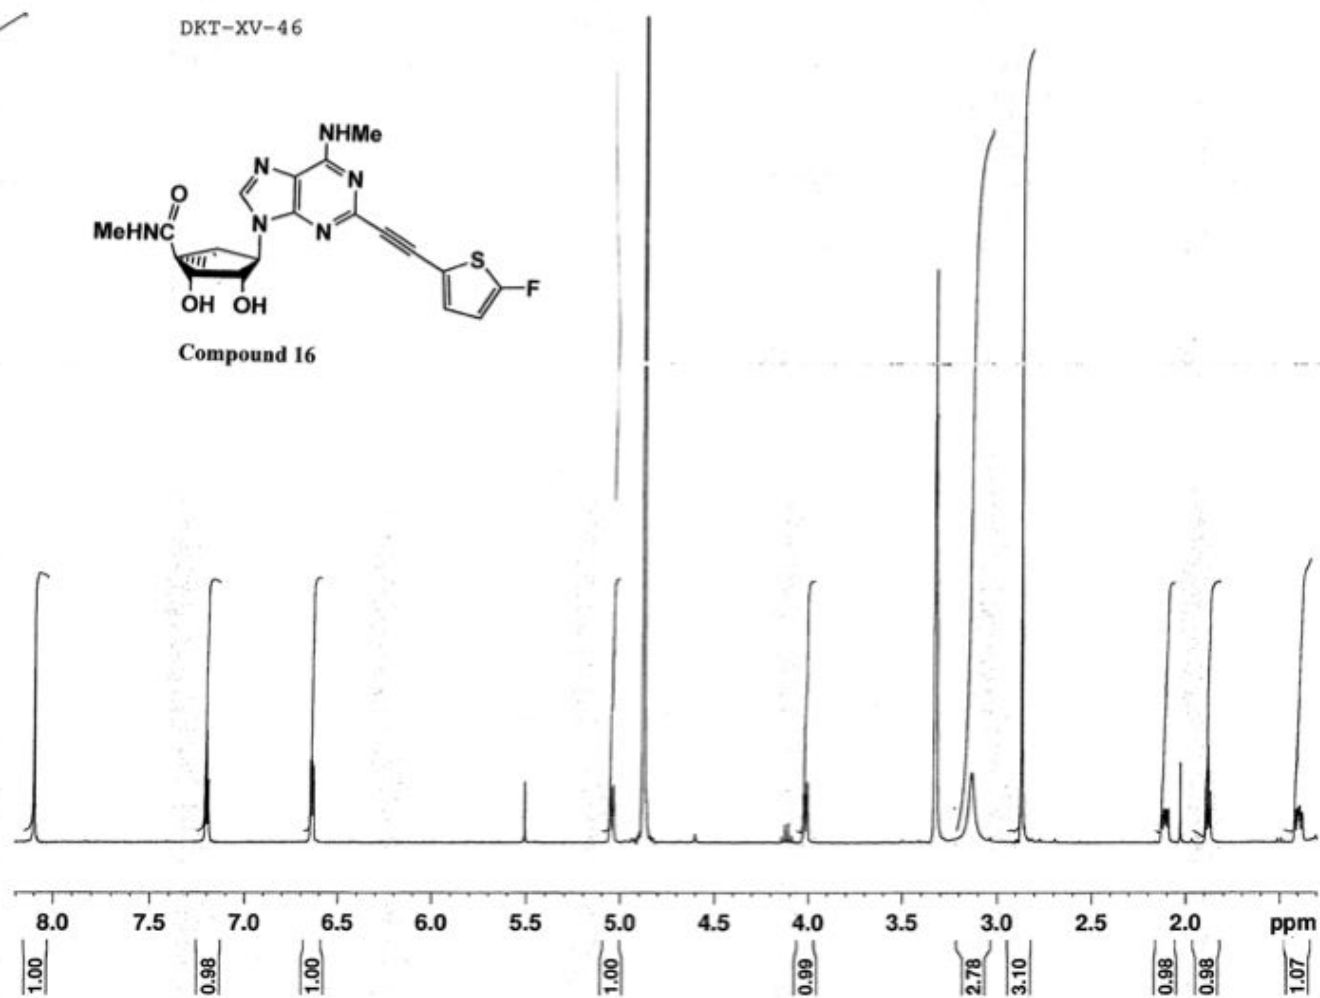

30-Aug-2016

dkt-30aug16-xv-47 154 (2.848) Cm (154-83x3.000)

TOF MS ES+  
7.99e3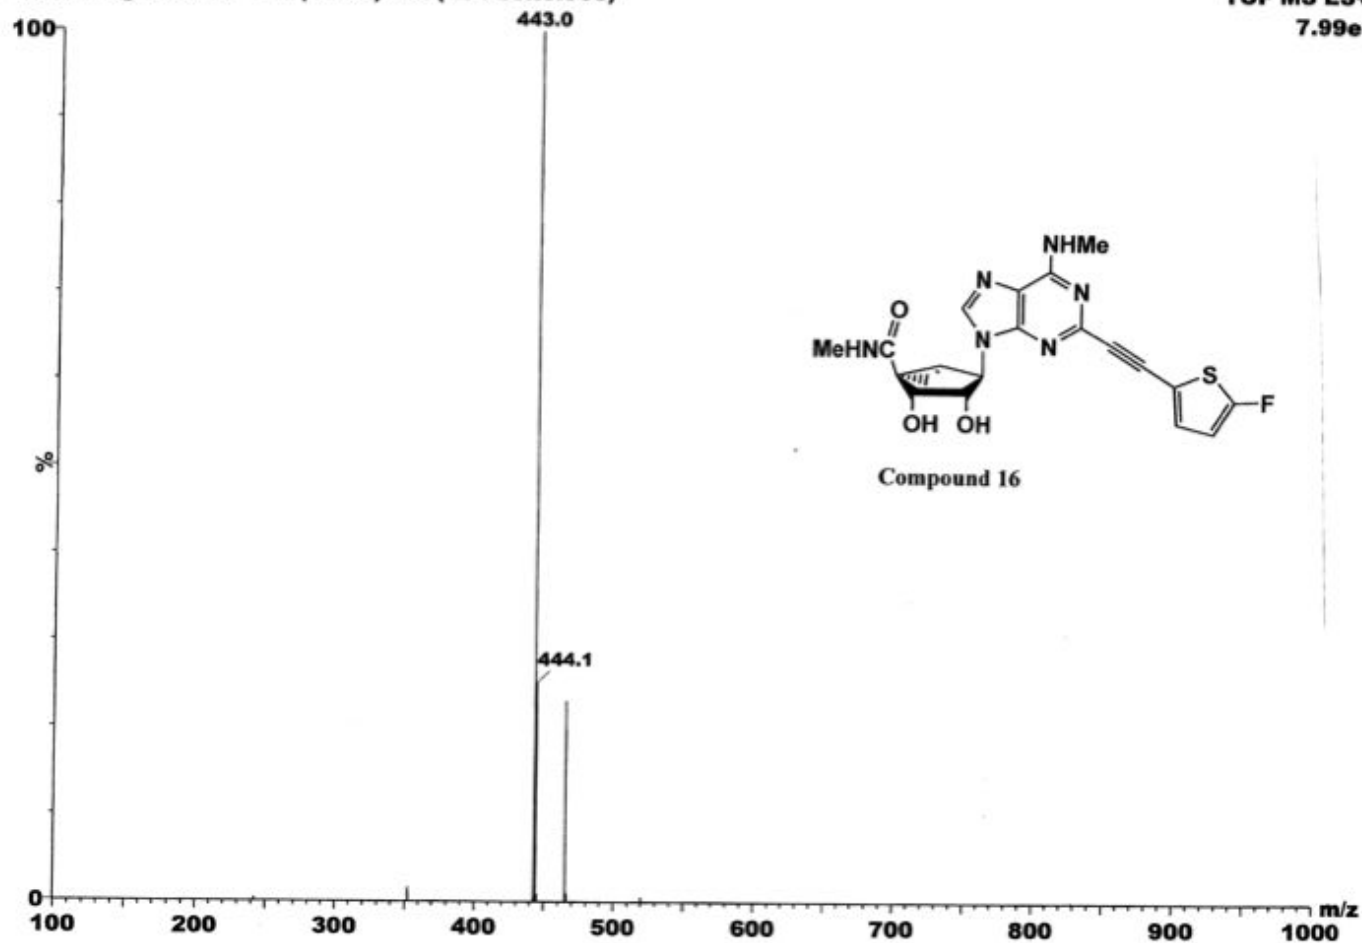

## Elemental Composition Report

## Single Mass Analysis

Tolerance = 10.0 mDa / DBE: min = -2.0, max = 1000.0

Element prediction: Off

Number of isotope peaks used for i-FIT = 5

## Monoisotopic Mass, Even Electron Ions

66 formula(e) evaluated with 3 results within limits (up to 19 closest results for each mass)

Elements Used:

C: 0-100 H: 0-200 N: 6-6 O: 0-40 F: 1-1 32S: 1-1

30-Aug-2016

dkt-30aug16-xv-47 160 (2.959) Cn (Cen,7, 50.00, Ar); Sm (SG, 3x5.00); Sb (12.5.00)

TOF MS ES+  
1.08e+004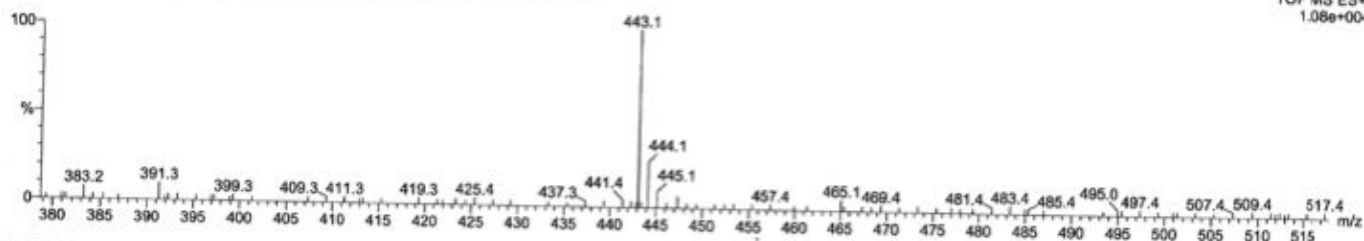

Minimum:

Maximum:

10.0 10.0 -2.0  
1000.0

| Mass     | Calc. Mass | mDa  | PPM   | DBE  | i-FIT | Formula             |
|----------|------------|------|-------|------|-------|---------------------|
| 443.1295 | 443.1302   | -0.7 | -1.6  | 13.5 | 169.3 | C20 H20 N6 O3 F 32S |
|          | 443.1360   | -6.5 | -14.7 | 4.5  | 317.7 | Cl3 H24 N6 O8 F 32S |
|          | 443.1208   | 8.7  | 19.6  | 0.5  | 528.6 | C9 H24 N6 O11 F 32S |

DKT-XVI-69

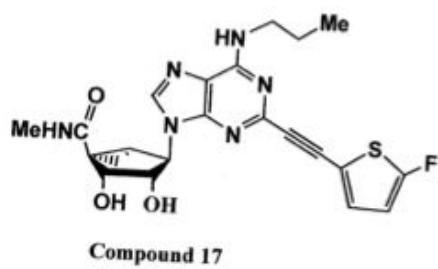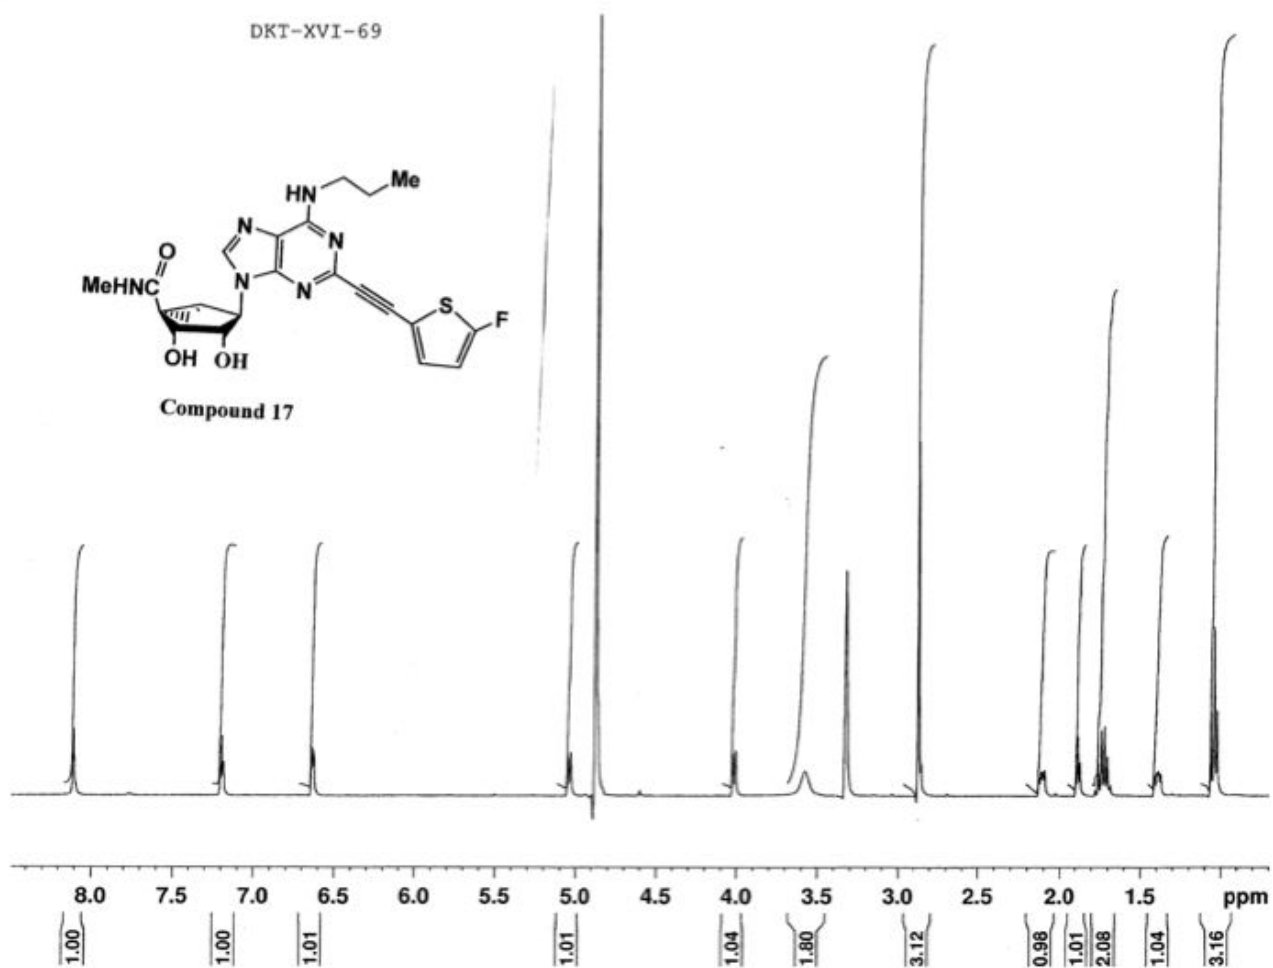

14-Jun-2017

dkt-14jun17-xvi-69 144 (2.663) Cm (144-32x3.000)

TOF MS ES+  
1.08e3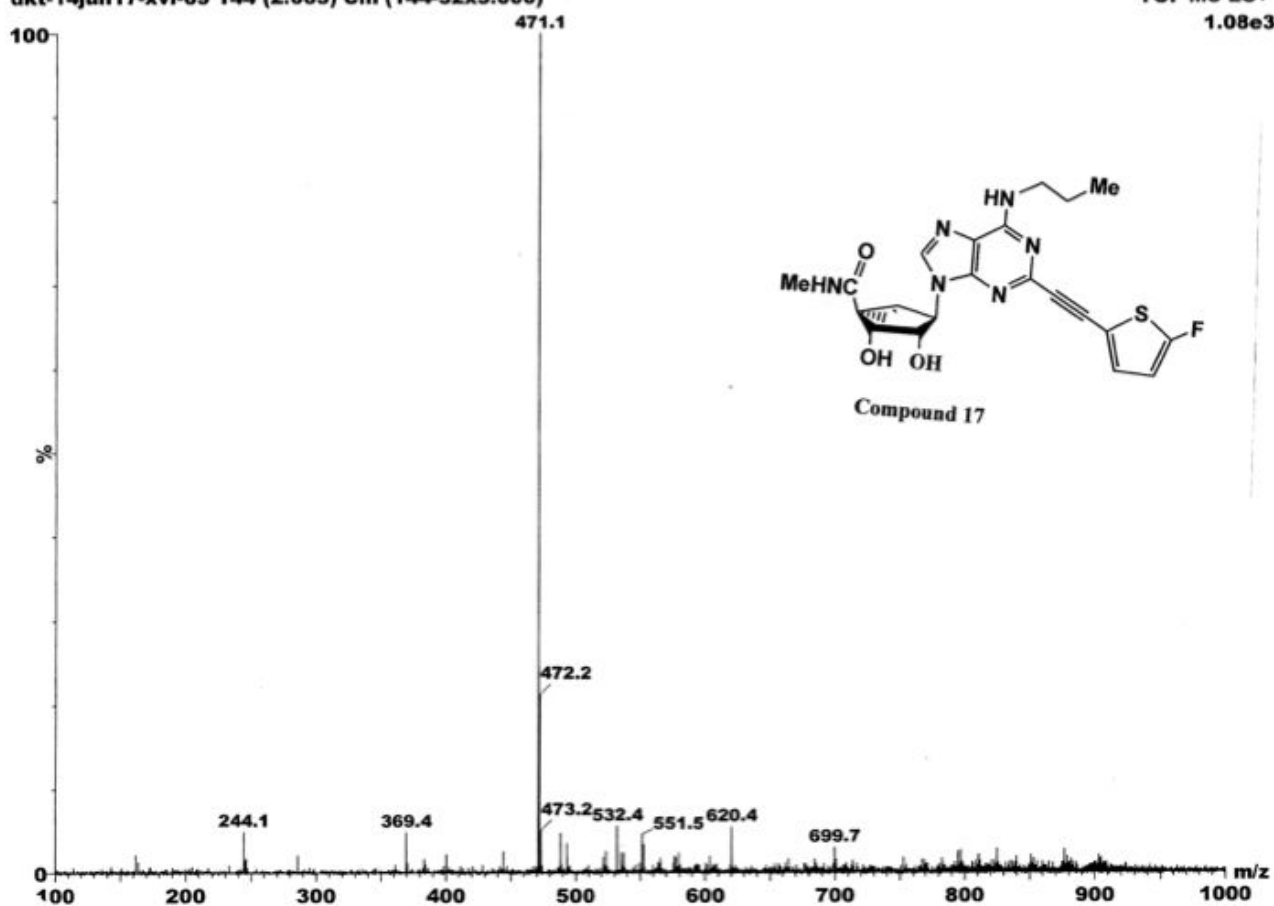

## Elemental Composition Report

Page 1

## Single Mass Analysis

Tolerance = 20.0 mDa / DBE: min = -2.0, max = 1000.0

Element prediction: Off

Number of isotope peaks used for i-FIT = 3

Monoisotopic Mass, Even Electron Ions

76 formula(e) evaluated with 5 results within limits (up to 19 closest results for each mass)

Elements Used:

C: 0-40 H: 0-200 N: 6-6 O: 0-40 F: 1-1 <sup>32</sup>S: 1-1

14-Jun-2017

dkl-14jun17-xvi-69 141 (2.606) Cn (Cen, 5, 50.00, Ar); Sm (SG, 3x5.00); Sb (12.5.00)

TOF MS ES+  
5.75e+003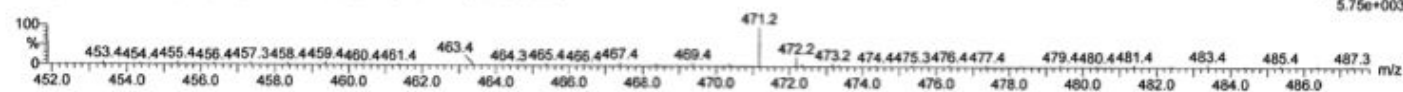

Minimum:

Maximum:

20.0

10.0

-2.0

1000.0

| Mass     | Calc. Mass | mDa   | PPM   | DBE  | i-FIT | Formula              |
|----------|------------|-------|-------|------|-------|----------------------|
| 471.1623 | 471.1615   | 0.8   | 1.7   | 13.5 | 68.3  | C22 H24 N6 O3 F 32S  |
|          | 471.1673   | -5.0  | -10.6 | 4.5  | 95.1  | C15 H28 N6 O8 F 32S  |
|          | 471.1521   | 10.2  | 21.6  | 0.5  | 176.5 | C11 H28 N6 O11 F 32S |
|          | 471.1767   | -14.4 | -30.6 | 17.5 | 106.5 | C26 H24 N6 F 32S     |
|          | 471.1462   | 16.1  | 34.2  | 9.5  | 102.7 | C18 H24 N6 O6 F 32S  |



DKT-XV-80

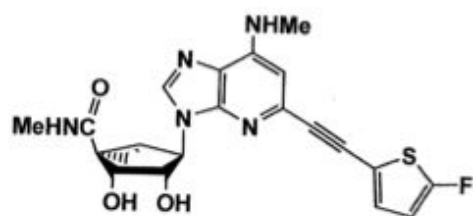

Compound 18

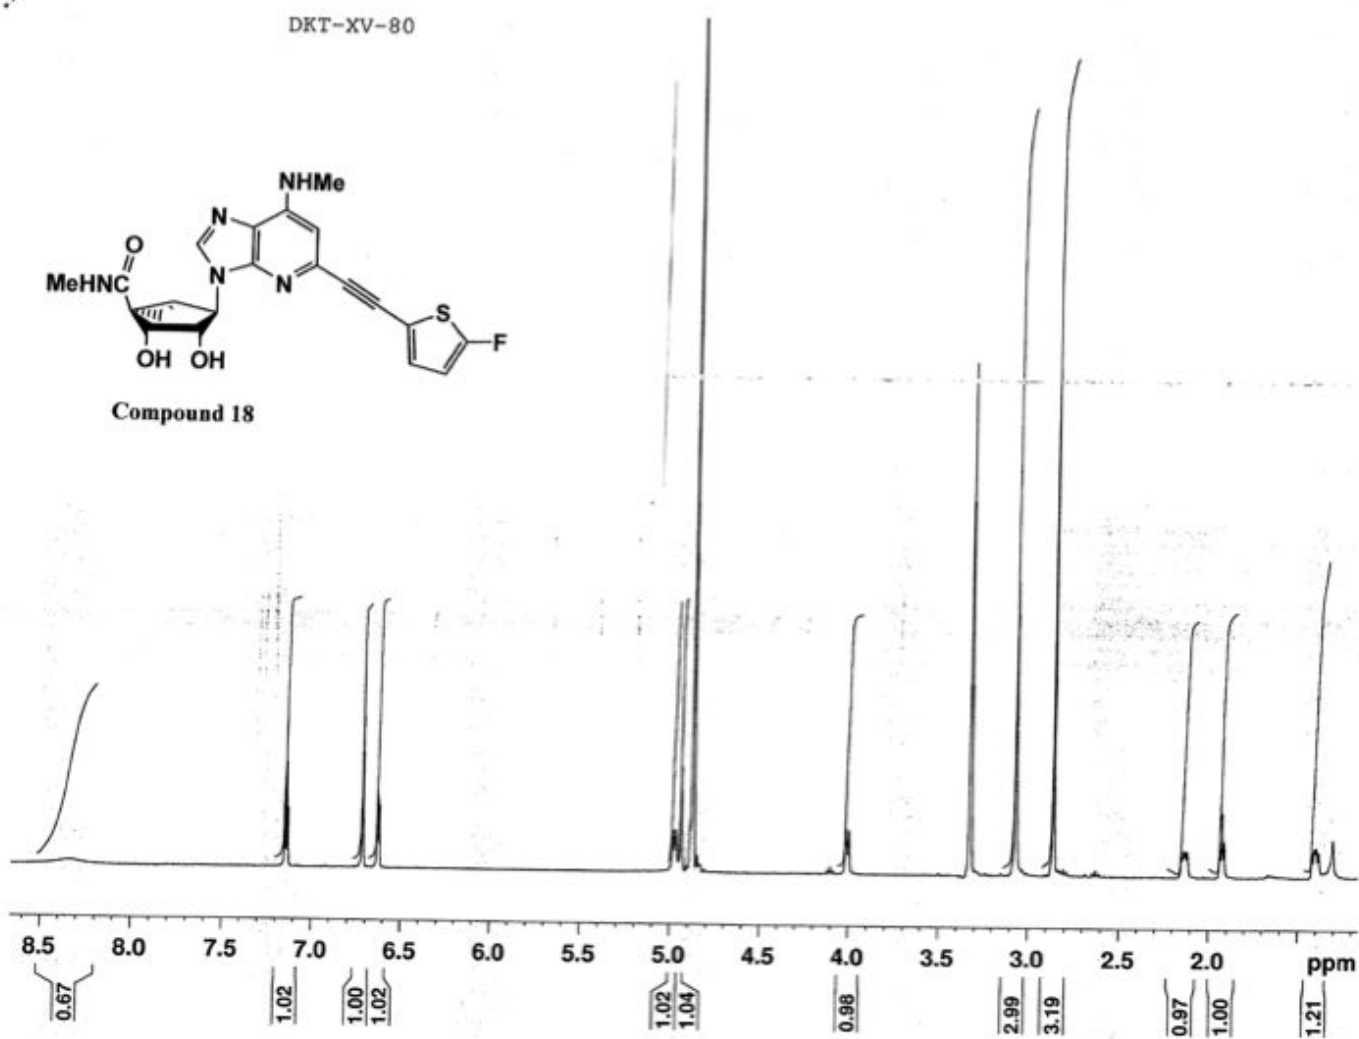

01-Nov-2016

dkt-01nov16-xv-80 81 (1.498)

TOF MS ES  
4.55e3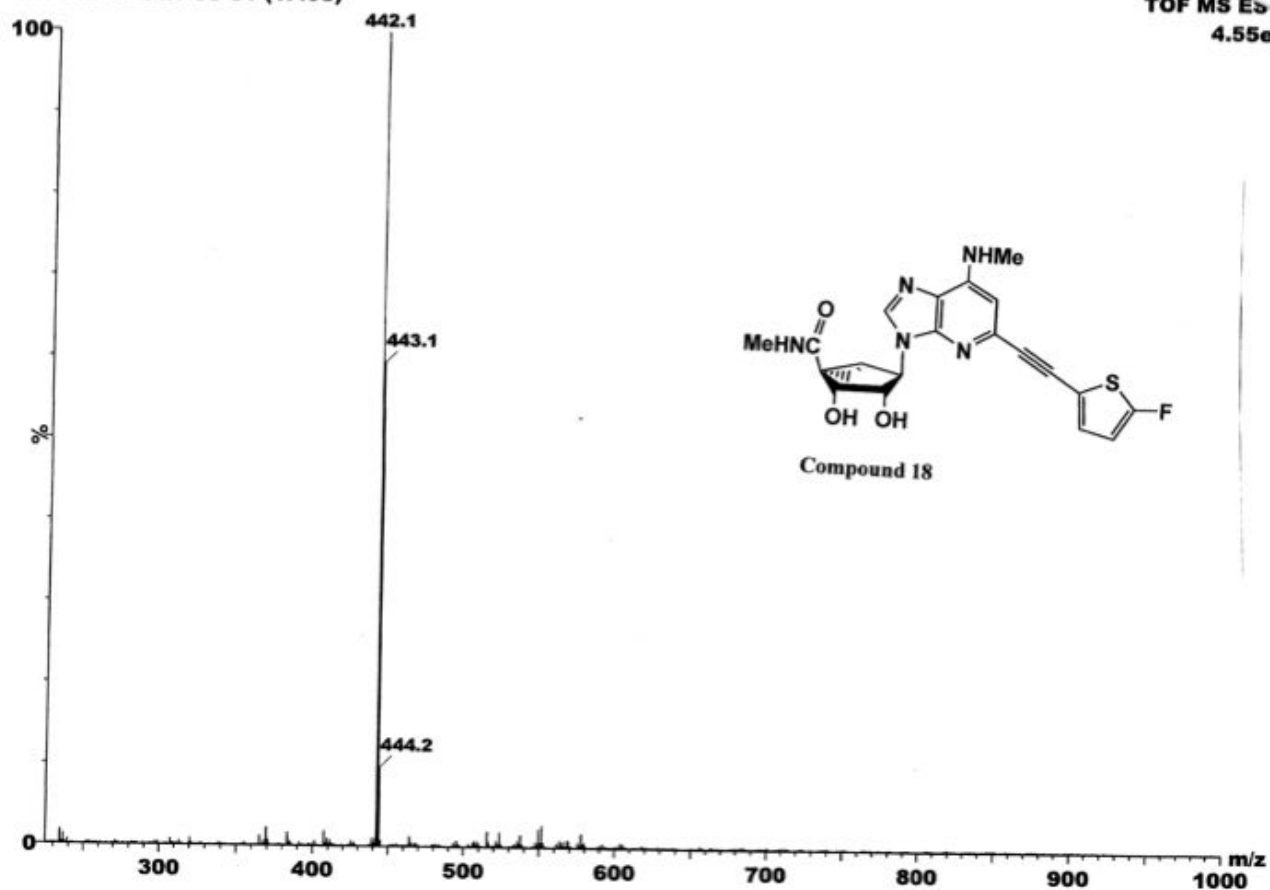

## Elemental Composition Report

## Single Mass Analysis

Tolerance = 10.0 mDa / DBE: min = -2.0, max = 1000.0

Element prediction: Off

Number of isotope peaks used for i-FIT = 3

## Monoisotopic Mass, Even Electron Ions

67 formula(e) evaluated with 3 results within limits (up to 19 closest results for each mass)

Elements Used:

C: 0-100 H: 0-200 N: 5-5 O: 0-50 F: 1-1 32S: 1-1

01-Nov-2016

dkt-01nov16-xv-80 85 (1.572) Cn (Cen,7, 50.00, Ar); Sm (SG, 1x3.00); Sb (12.5.00)

TOF MS ES+  
6.06e+003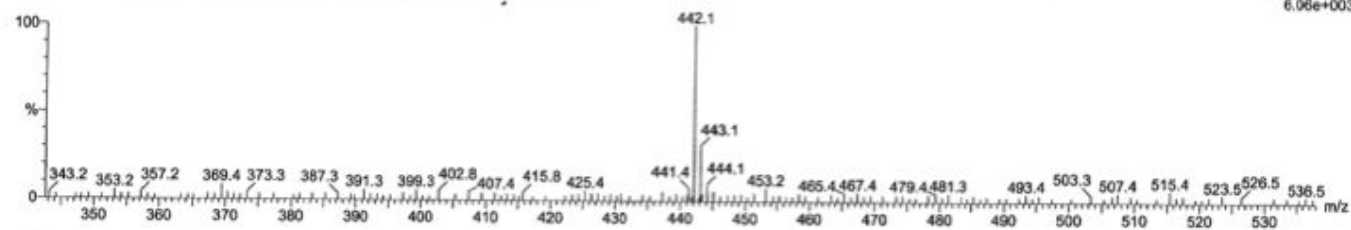

Minimum:

Maximum: 10.0 10.0 -2.0

Maximum: 1000.0

| Mass     | Calc. Mass | mDa  | PPM   | DBE  | i-FIT | Formula              |
|----------|------------|------|-------|------|-------|----------------------|
| 442.1349 | 442.1349   | 0.0  | 0.0   | 13.5 | 121.1 | C21 H21 N5 O3 F 32S  |
|          | 442.1408   | -5.9 | -13.3 | 4.5  | 271.5 | C14 H25 N5 O8 F 32S  |
|          | 442.1255   | 9.4  | 21.3  | 0.5  | 412.2 | C10 H25 N5 O11 F 32S |
